# Supplementary material for: Laxiflorol A, the first example of 7,8:15,16-di-seco-15-nor-21-homo-ent-kauranoid from Isodon eriocalyx var. laxiflora
Source: Royal Society of Chemistry journal article supplement (doi:10.1039/c4ra12704h), 2014-11-27
Supplement: c4ra12704h1.pdf [file c4ra12704h1.pdf]

**Supplementary Information for**  
**Laxiflorol A, the First Example of 7,8:15,16-di-seco-15-nor-21-homo-**  
***ent*-Kauranoid from *Isodon eriocalyx* var. *laxiflora***

**Wei-Guang Wang, Jian-Wei Tang, Yi-Ming Shi, Xue Du, Xiao-Nian Li, Hai-Yan Wu, Hua-Yi Jiang, Yan Li, Jian-Xin Pu, and Han-Dong Sun**

*State Key Laboratory of Phytochemistry and Plant Resources in West China, Kunming Institute of Botany, Chinese Academy of Sciences, Kunming 650201, Yunnan, P. R. China; University of Chinese Academy of Sciences, Beijing 100049, P. R. China.*

\* Corresponding author Tel.: +86-871-65223616

E-mail: pujianxin@mail.kib.ac.cn.

## Contents of Supporting Information

| No. | Contents                                                                           | Page | No. | Contents                                                                                                                                                                                        | Page |
|-----|------------------------------------------------------------------------------------|------|-----|-------------------------------------------------------------------------------------------------------------------------------------------------------------------------------------------------|------|
| 1.  | Figure S1. $^{13}\text{C}$ NMR spectrum of laxiflorol A ( <b>1</b> )               | 3    | 18. | Figure S18. ESIMS spectrum of laxiflorol B ( <b>2</b> )                                                                                                                                         | 26   |
| 2.  | Figure S2. $^1\text{H}$ NMR spectrum of laxiflorol A ( <b>1</b> )                  | 4    | 19. | Figure S19. HRESIMS spectrum of laxiflorol B ( <b>2</b> )                                                                                                                                       | 27   |
| 3.  | Figure S3. HSQC spectrum of laxiflorol A ( <b>1</b> )                              | 5    | 20. | Figure S20. UV spectrum of laxiflorol B ( <b>2</b> )                                                                                                                                            | 28   |
| 4.  | Figure S4. HSQC-TOCSY spectrum of laxiflorol A ( <b>1</b> )                        | 6    | 21. | Figure S21. IR spectrum of laxiflorol B ( <b>2</b> )                                                                                                                                            | 29   |
| 5.  | Figure S5. $^1\text{H}$ - $^1\text{H}$ COSY spectrum of laxiflorol A ( <b>1</b> )  | 7    | 22. | Figure S22. ORD spectrum of laxiflorol B ( <b>2</b> )                                                                                                                                           | 30   |
| 6.  | Figure S6. HMBC spectrum of laxiflorol A ( <b>1</b> )                              | 10   | 23. | Figure S23. X-ray structure of laxiflorol B ( <b>2</b> )                                                                                                                                        | 31   |
| 7.  | Figure S7. ROESY spectrum of laxiflorol A ( <b>1</b> )                             | 15   | 24. | Table S1. NMR Spectroscopic Data ( $\delta$ in ppm, $J$ in Hz) of Compound <b>2</b> <sup>a</sup>                                                                                                | 32   |
| 8.  | Figure S8. ESIMS spectrum of laxiflorol A ( <b>1</b> )                             | 16   | 25. | Detailed experimental procedures                                                                                                                                                                | 33   |
| 9.  | Figure S9. HRESIMS spectrum of laxiflorol A ( <b>1</b> )                           | 17   | 26. | Figure S24. Optimized geometries of conformers of <b>1</b> at the B3LYP/6-31G(d,p) level in the gas phase.                                                                                      | 38   |
| 10. | Figure S10. UV spectrum of laxiflorol A ( <b>1</b> )                               | 18   | 27. | Table S2. Important thermodynamic parameters (a.u.) of the optimized <b>1</b> at B3LYP/6-31G(d,p) level in the gas phase.                                                                       | 39   |
| 11. | Figure S11. ORD spectrum of laxiflorol A ( <b>1</b> )                              | 19   | 28. | Table S3. Conformational analysis of <b>1</b> .                                                                                                                                                 | 39   |
| 12. | Figure S12. $^{13}\text{C}$ NMR spectrum of laxiflorol B ( <b>2</b> )              | 20   | 29. | Table S4. Key transitions, oscillator strengths, and rotatory strengths in the ECD spectra of conformer <b>1</b> at B3LYP-SCRF/6-31++G(d,p)//B3LYP/6-31G(d,p) level with PCM model in methanol. | 40   |
| 13. | Figure S13. $^1\text{H}$ NMR spectrum of laxiflorol B ( <b>2</b> )                 | 21   | 30. | Table S5. Optimized Z-matrixes of <b>1</b> in the gas phase ( $\text{\AA}$ ) at B3LYP/6-31G(d,p) level.                                                                                         | 41   |
| 14. | Figure S14. HSQC spectrum of laxiflorol B ( <b>2</b> )                             | 22   | 31. | Figure S25. Optimized geometries of conformers of 6,8- <i>epi</i> - <b>1</b> at the B3LYP/6-31G(d,p) level in the gas phase.                                                                    | 49   |
| 15. | Figure S15. $^1\text{H}$ - $^1\text{H}$ COSY spectrum of laxiflorol B ( <b>2</b> ) | 23   | 32. | Table S6. Important thermodynamic parameters (a.u.) of the optimized 6,8- <i>epi</i> - <b>1</b> at B3LYP/6-31G(d,p) level in the gas phase.                                                     | 50   |
| 16. | Figure S16. HMBC spectrum of laxiflorol B ( <b>2</b> )                             | 24   | 33. | Table S7. Conformational analysis of <b>1</b> .                                                                                                                                                 | 50   |

Figure S1.  $^{13}\text{C}$  NMR spectrum of laxiflorol A (1)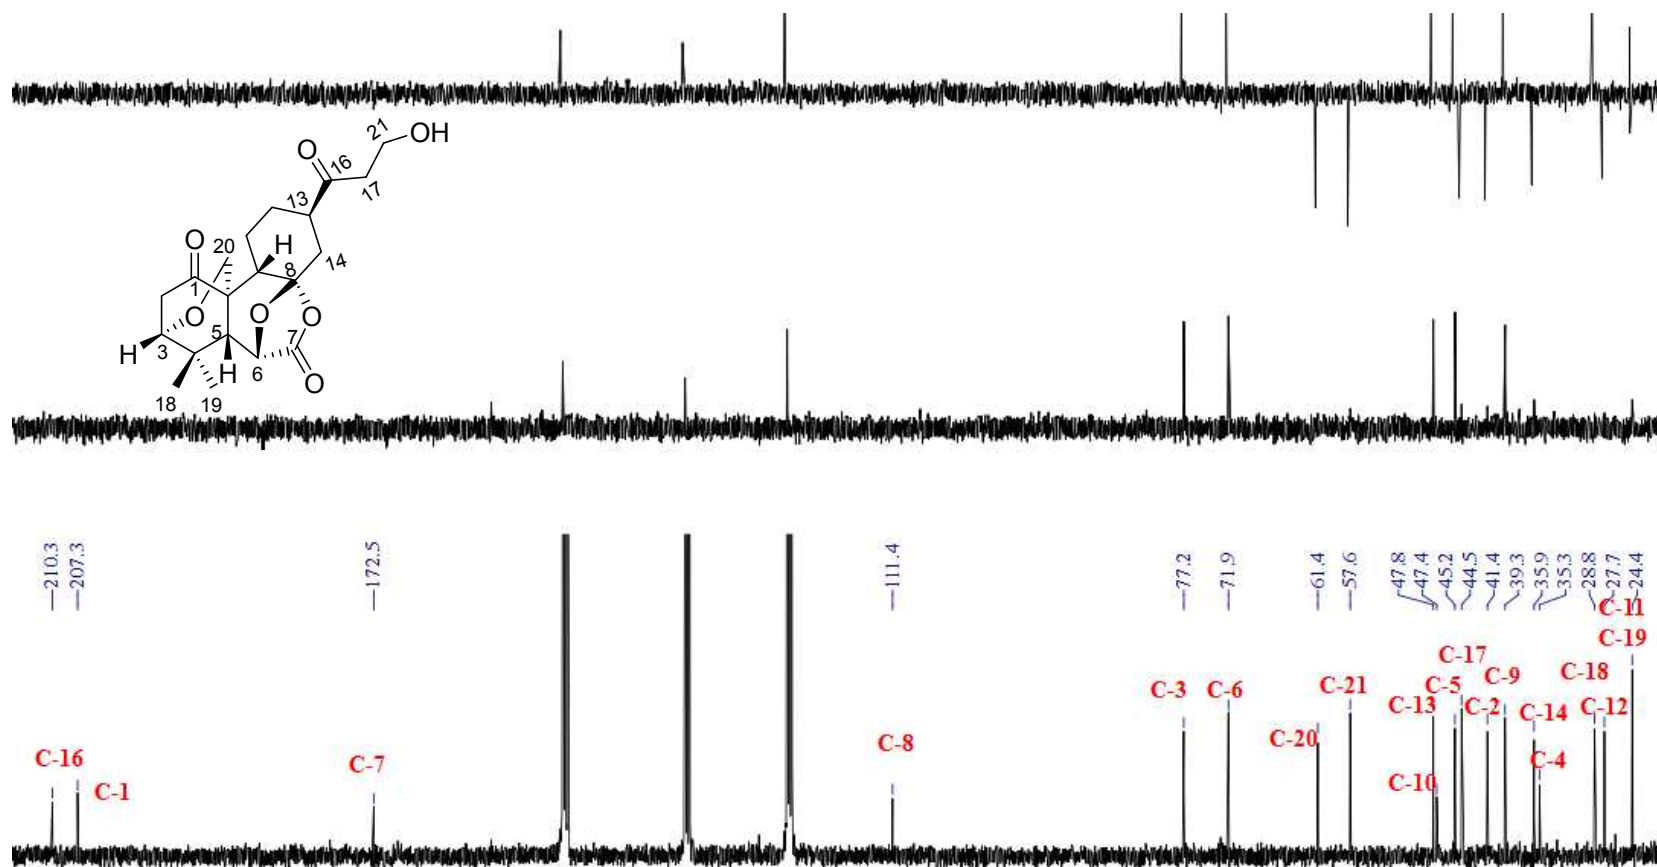

Figure S2.  $^1\text{H}$  NMR spectrum of laxiflorol A (**1**)



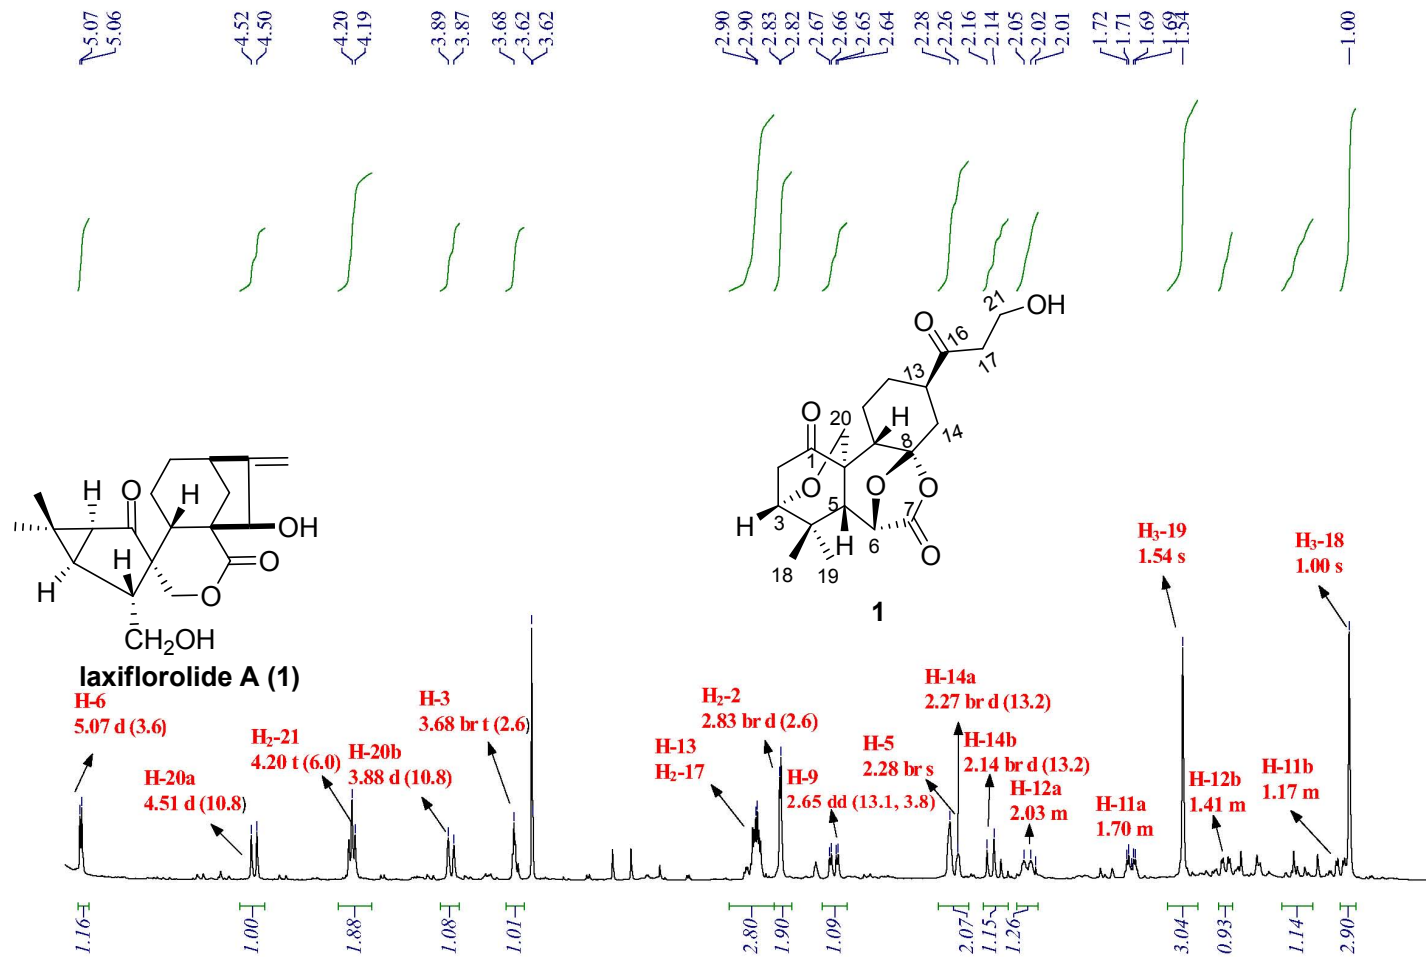

Figure S3. HSQC spectrum of laxiflorol A (1)

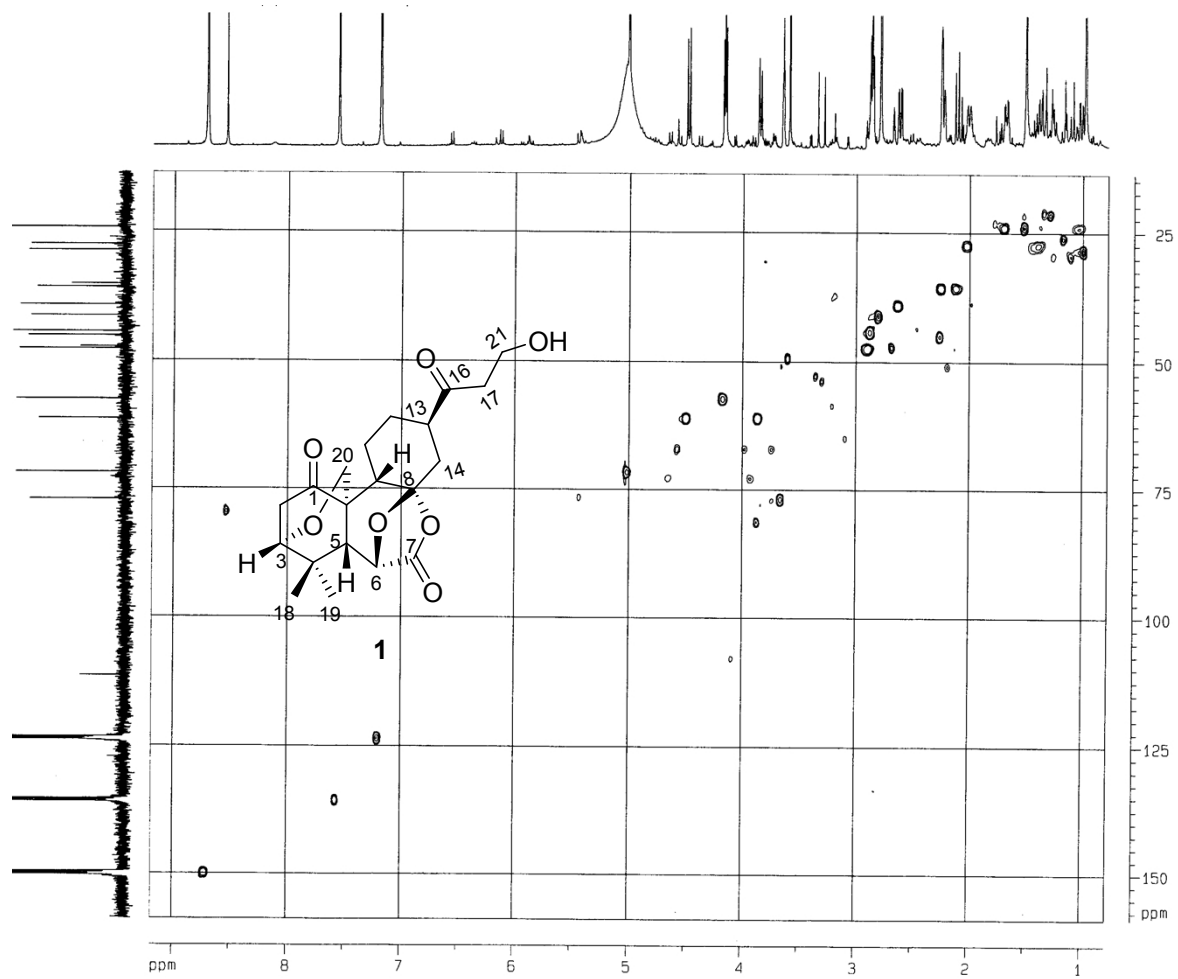

Figure S4. HSQC-TOCSY spectrum of laxiflorol A (**1**)

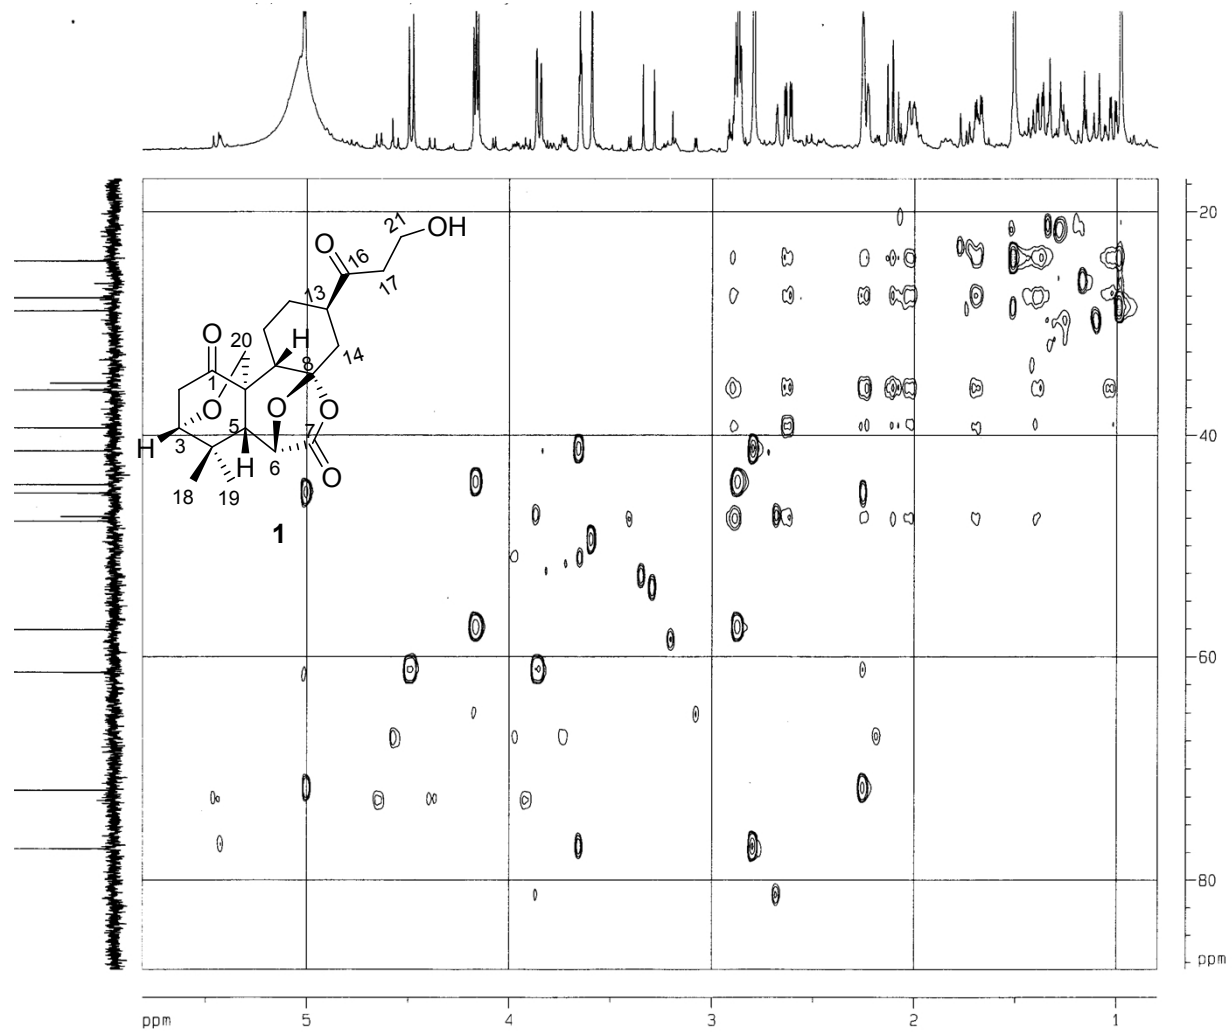

Figure S5.  $^1\text{H}$ - $^1\text{H}$  COSY spectrum of laxiflorol A (**1**)

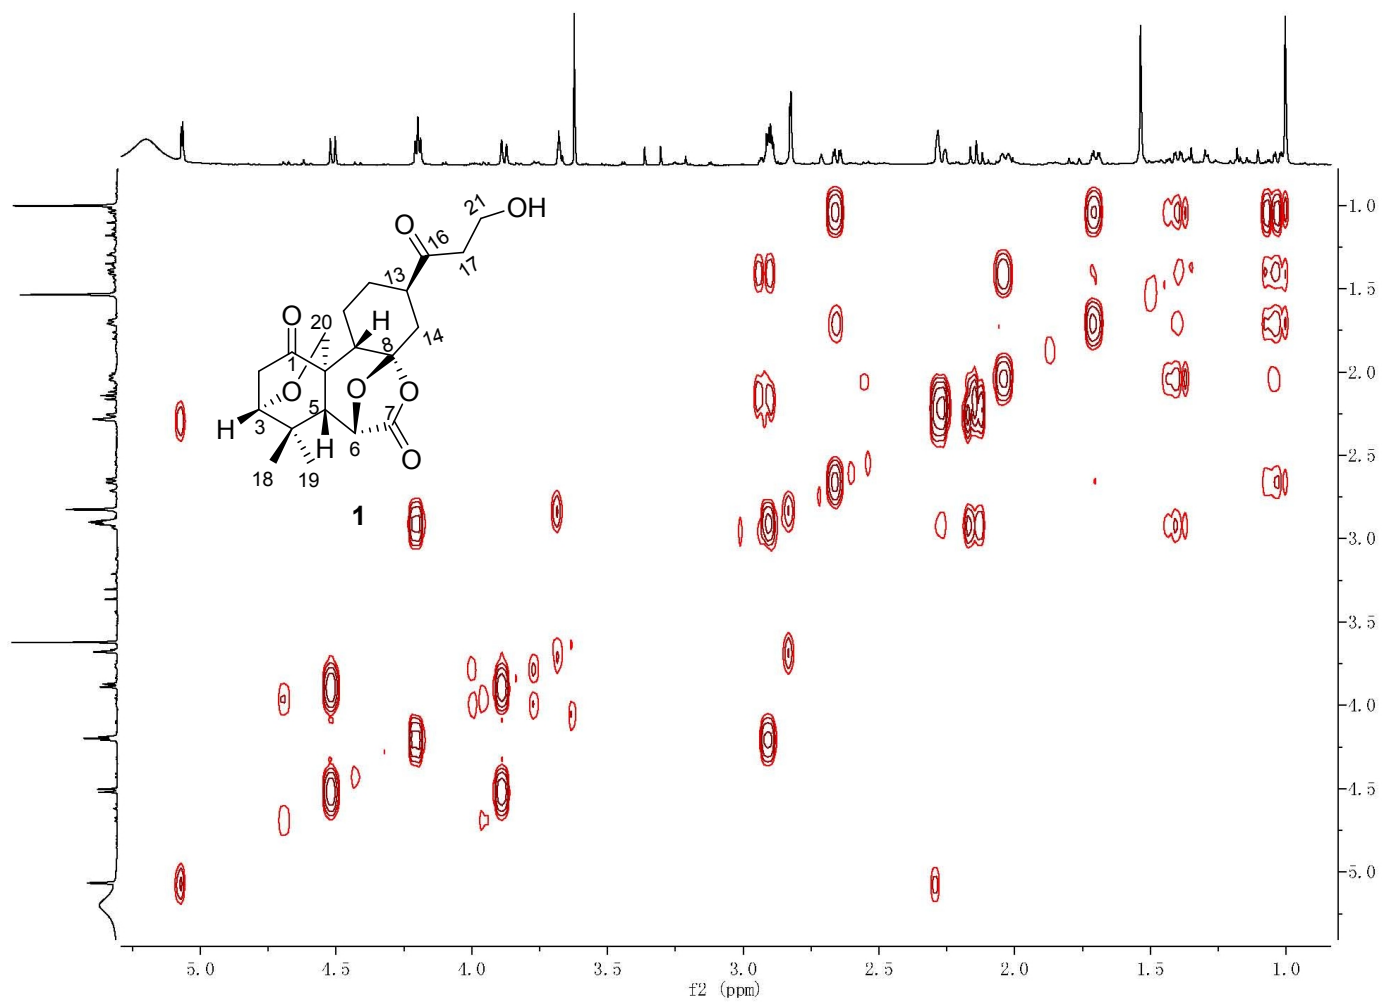

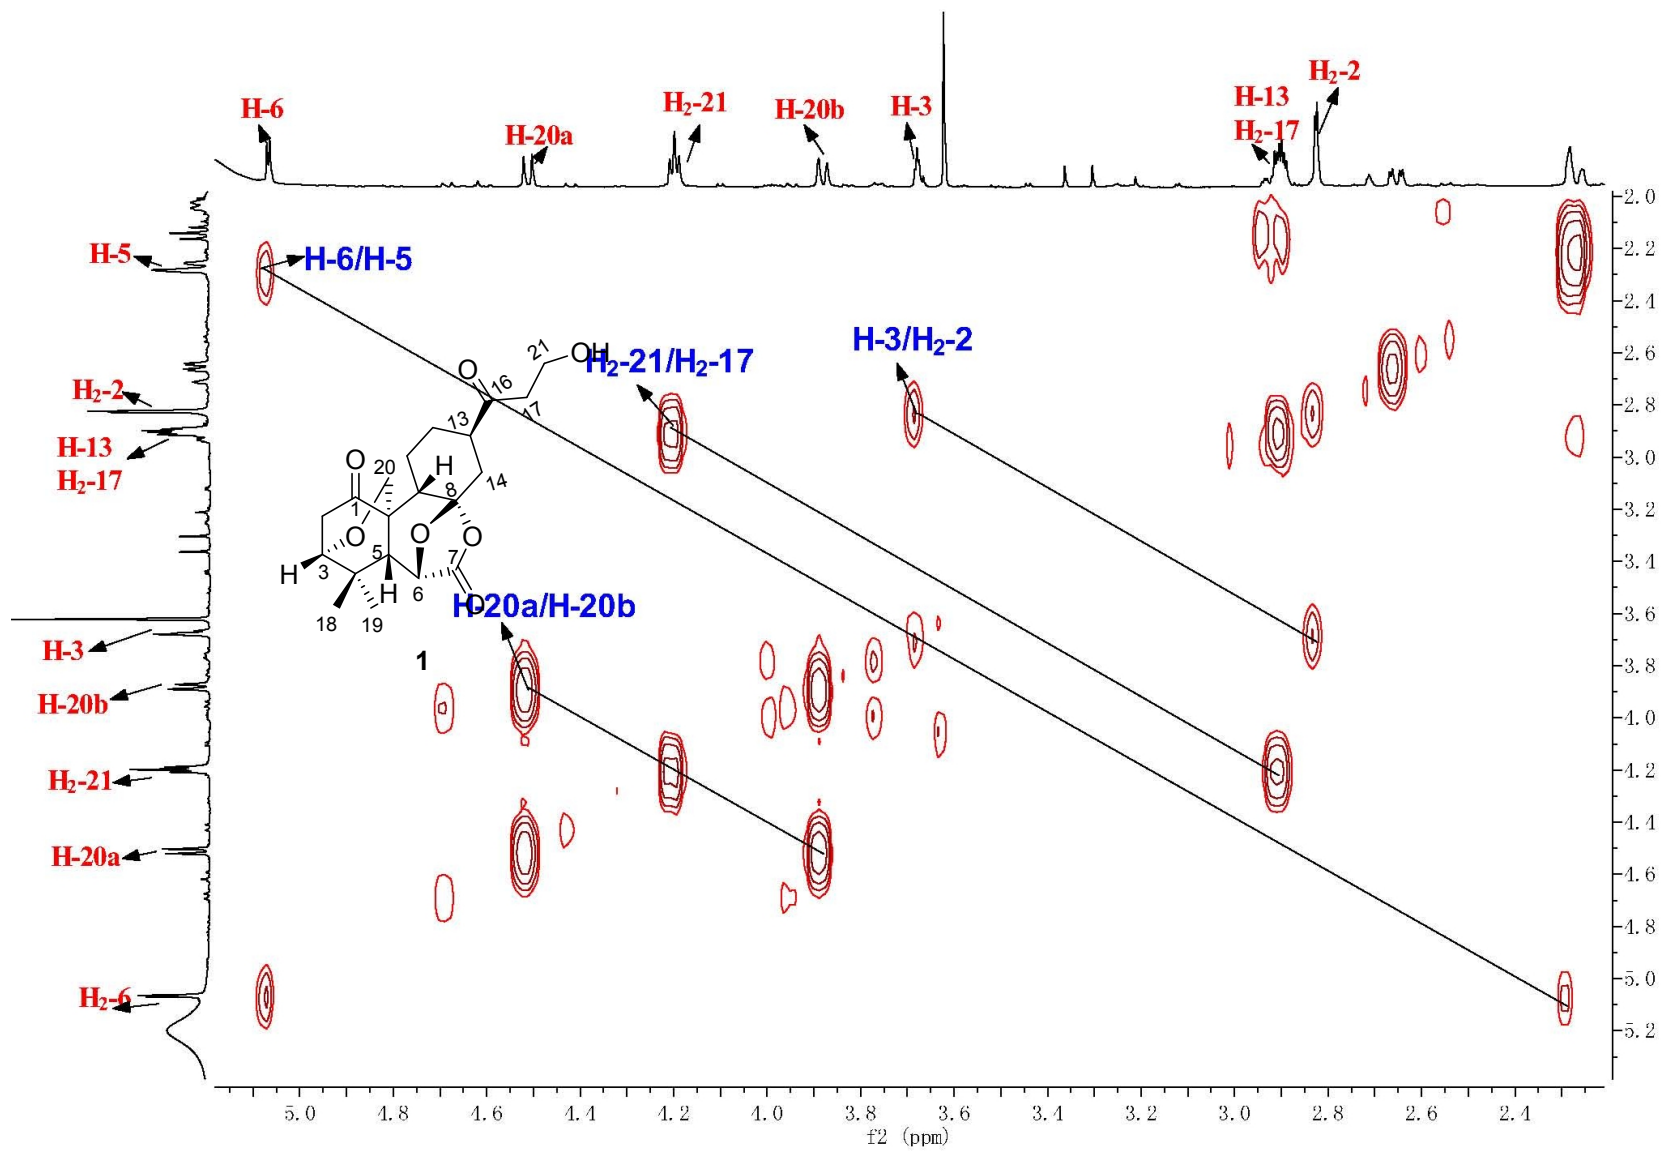

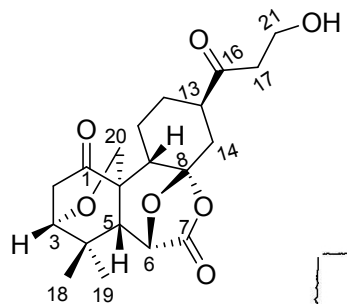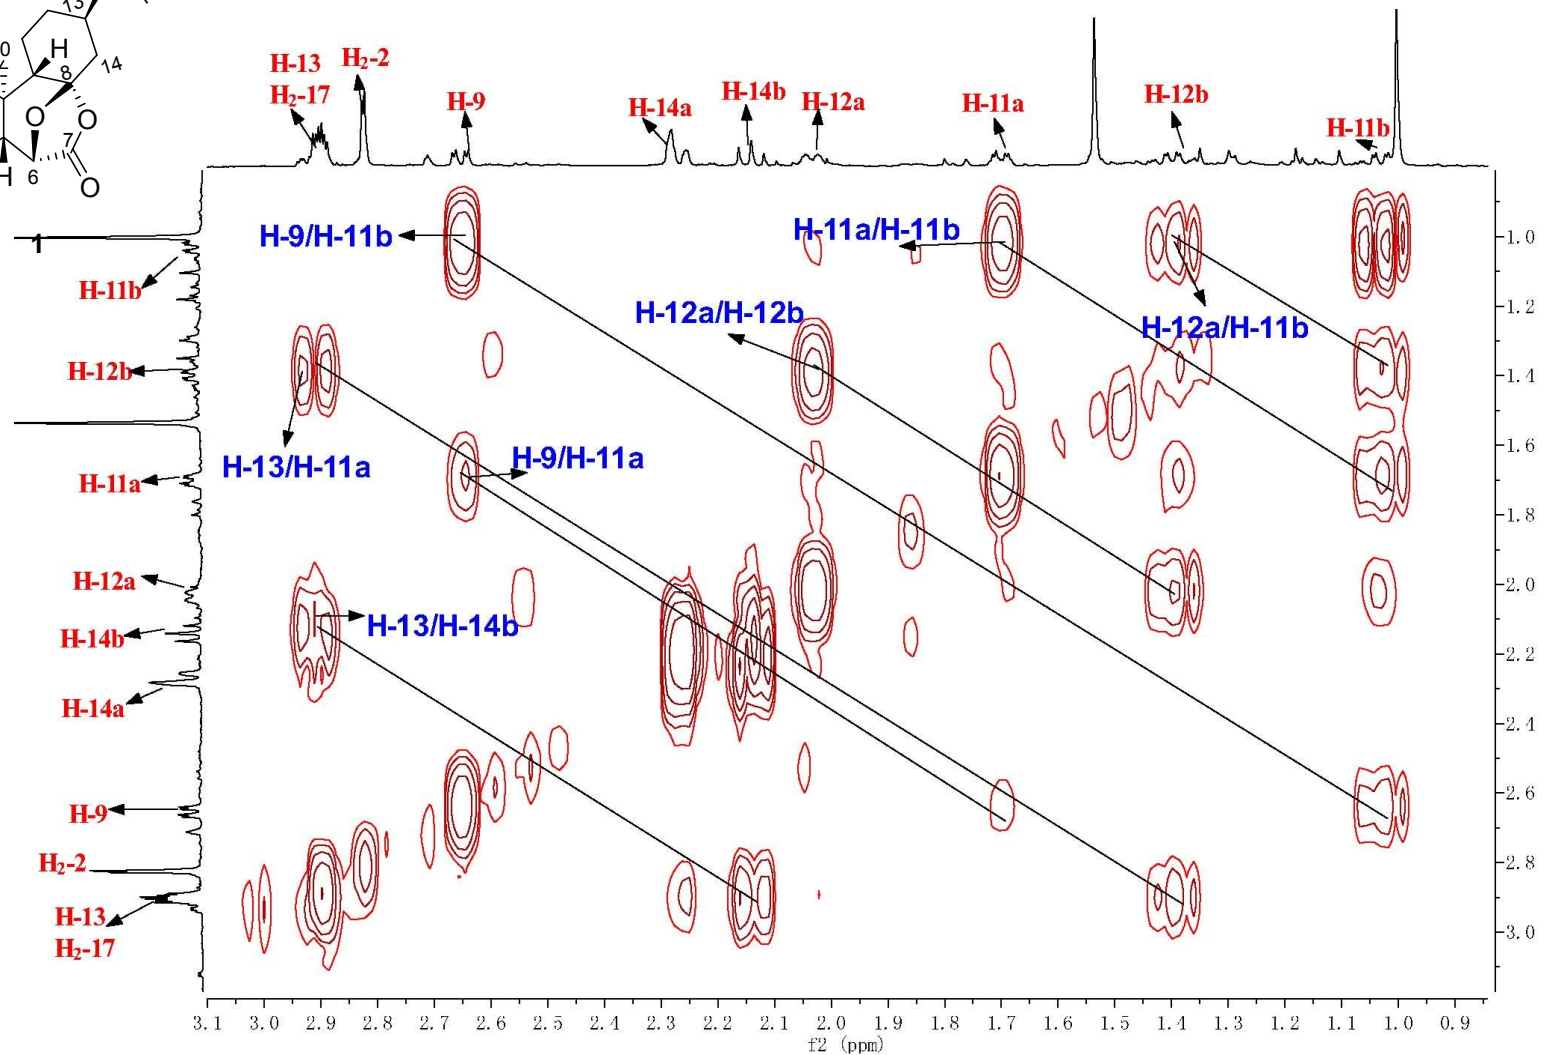

Figure S6. HMBC spectrum of laxiflorol A (1)

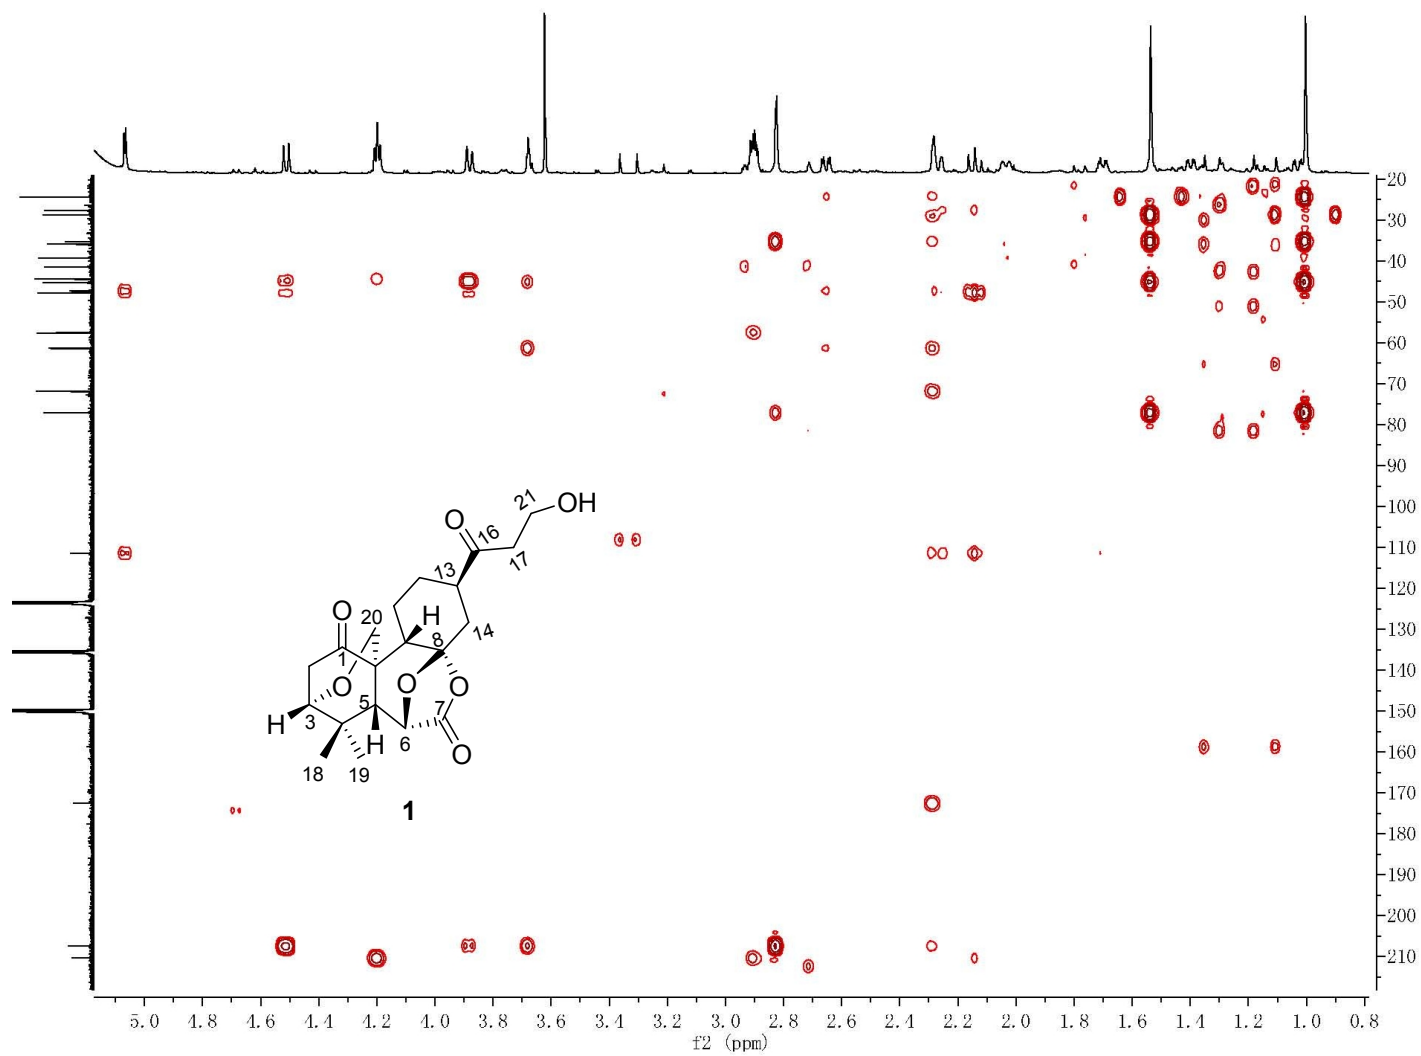

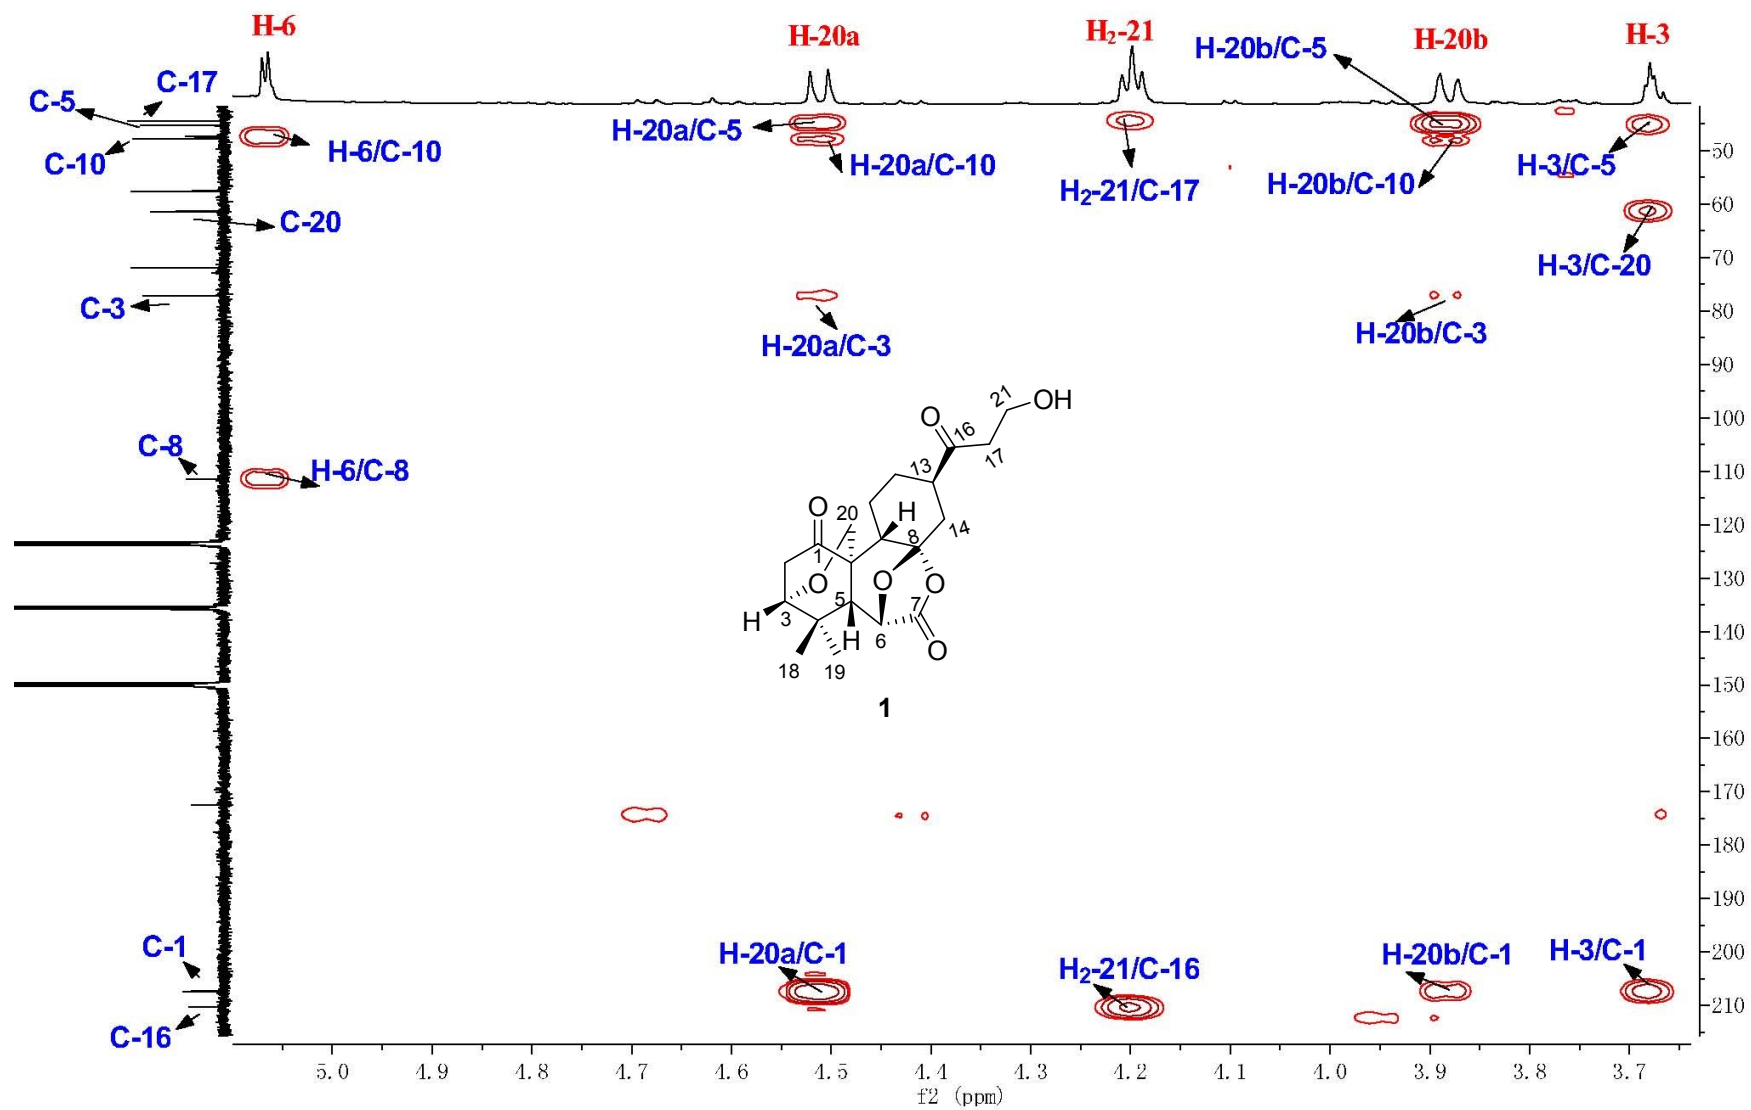



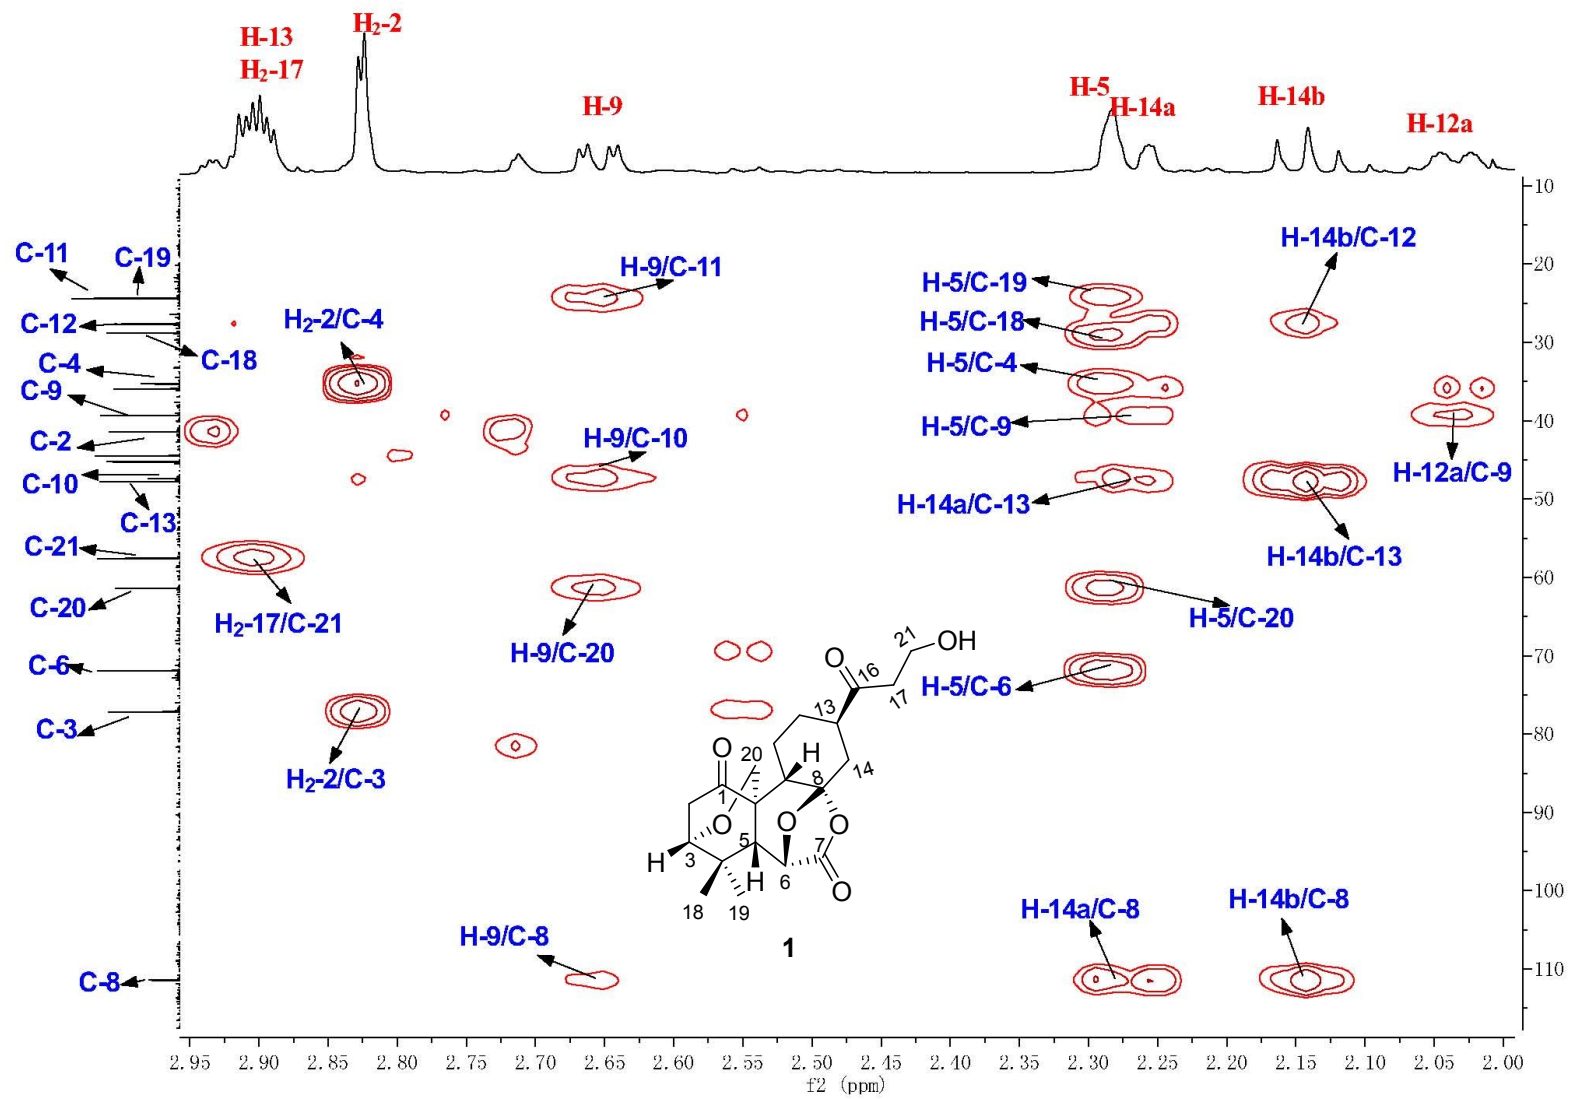

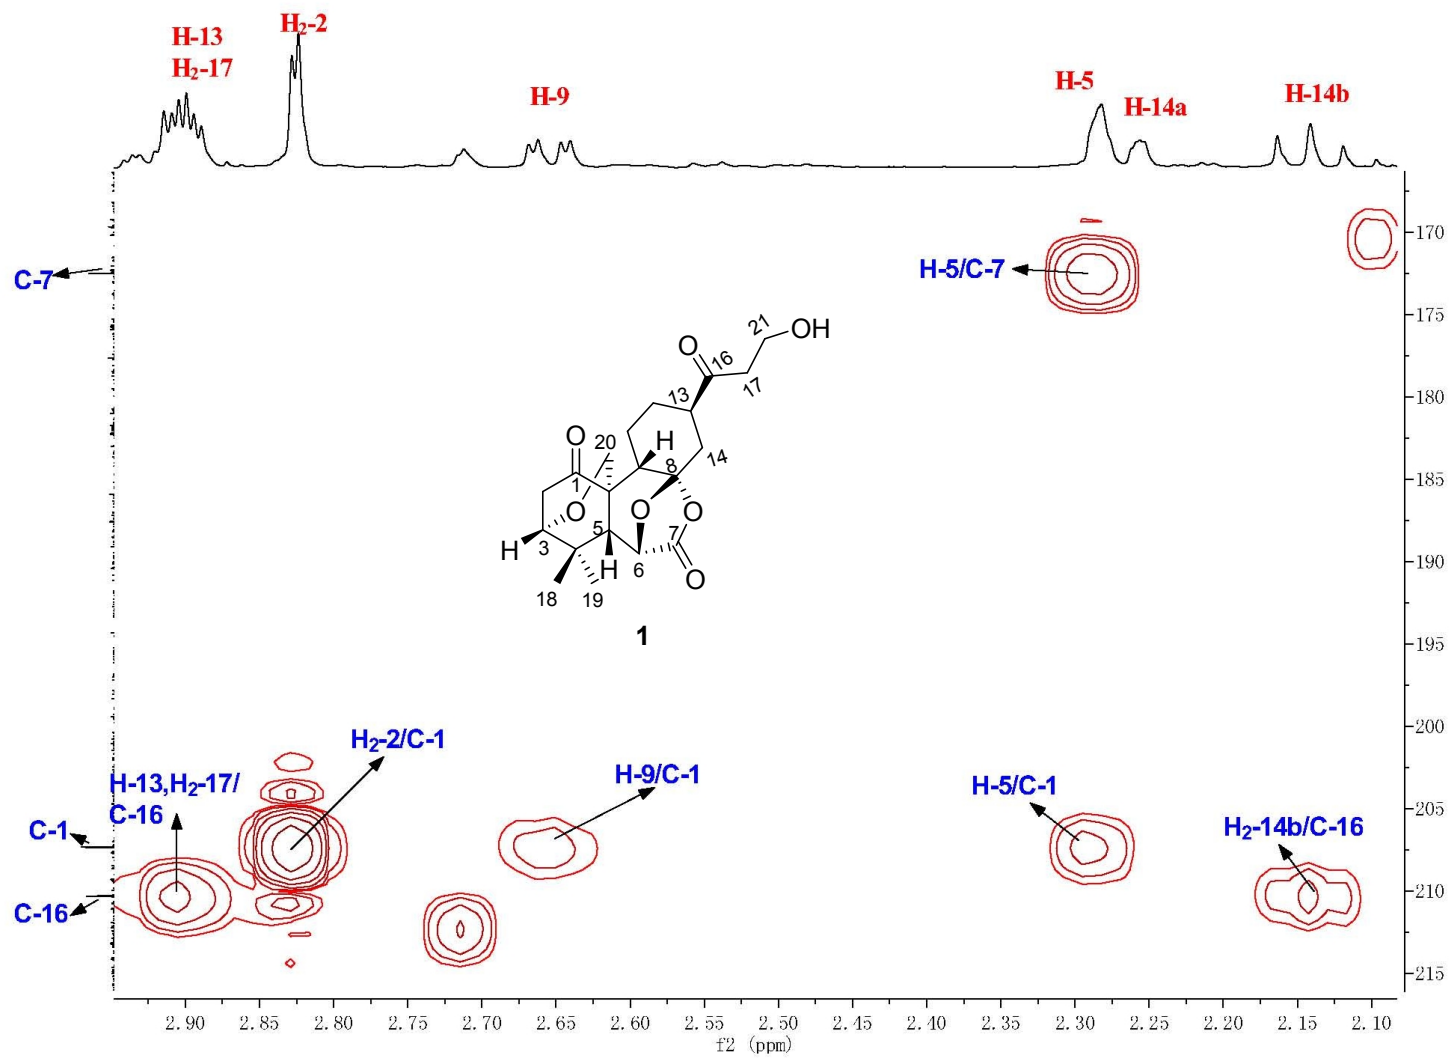

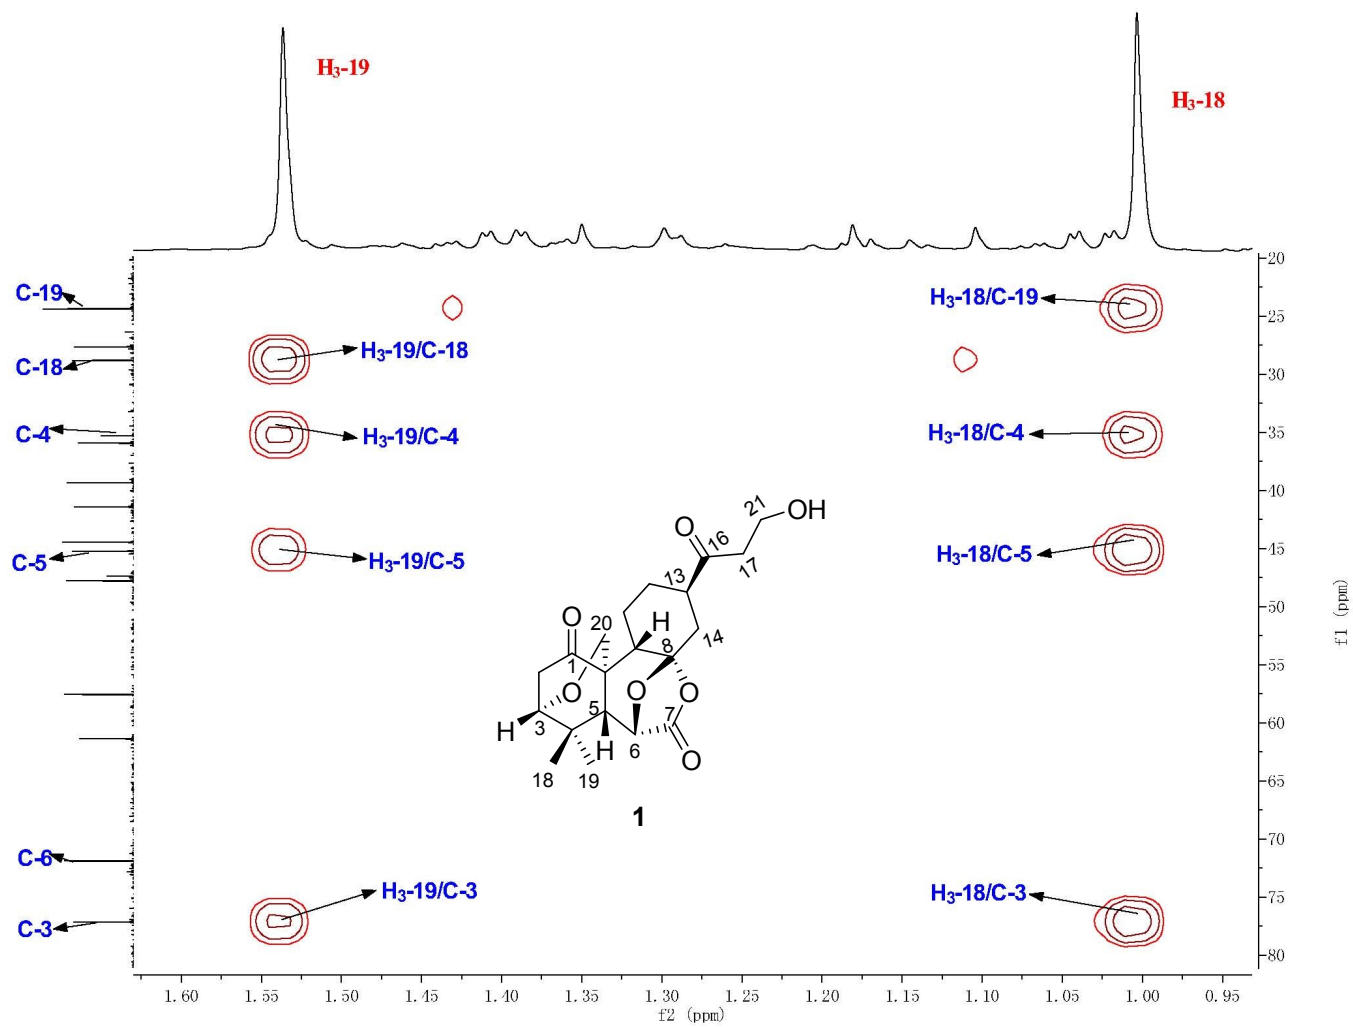



Figure S8. ESIMS spectrum of laxiflorol A (1)

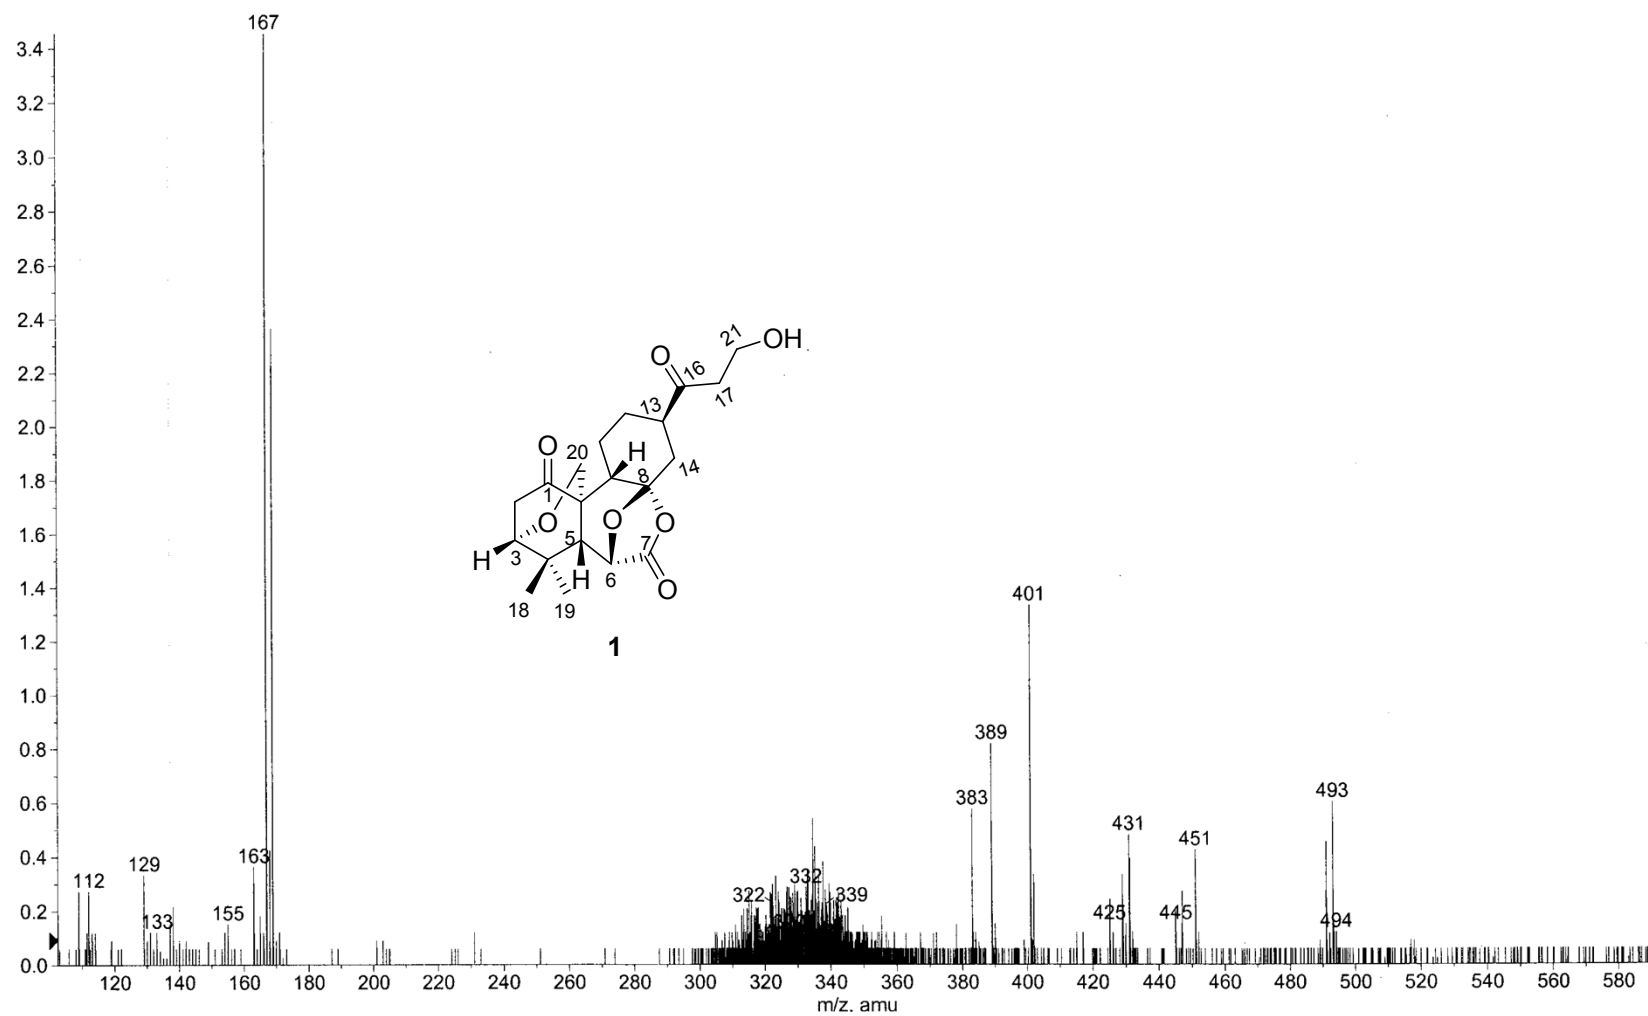

Figure S9. HRESIMS spectrum of laxiflorol A (1)

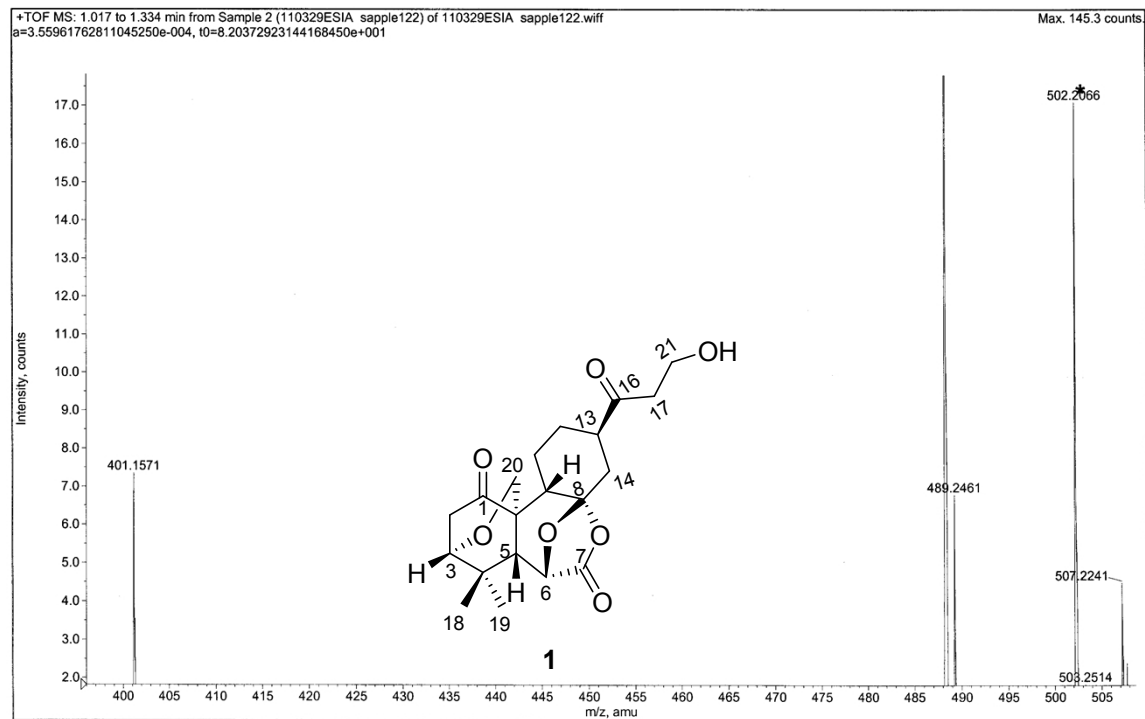

|    | Elements | Min Number | Max Number |
|----|----------|------------|------------|
| 11 | Pt       | 0          | 0          |
| 12 | S        | 0          | 0          |
| 13 | Si       | 0          | 0          |

  

|   | Formula                                           | Calculated m/z (amu) | mDa Error | PPM Error | DBE |
|---|---------------------------------------------------|----------------------|-----------|-----------|-----|
| 1 | C <sub>20</sub> H <sub>26</sub> O <sub>7</sub> Na | 401.1576             | -0.5232   | -1.3042   | 7.5 |

Figure S10. UV spectrum of laxiflorol A (1)

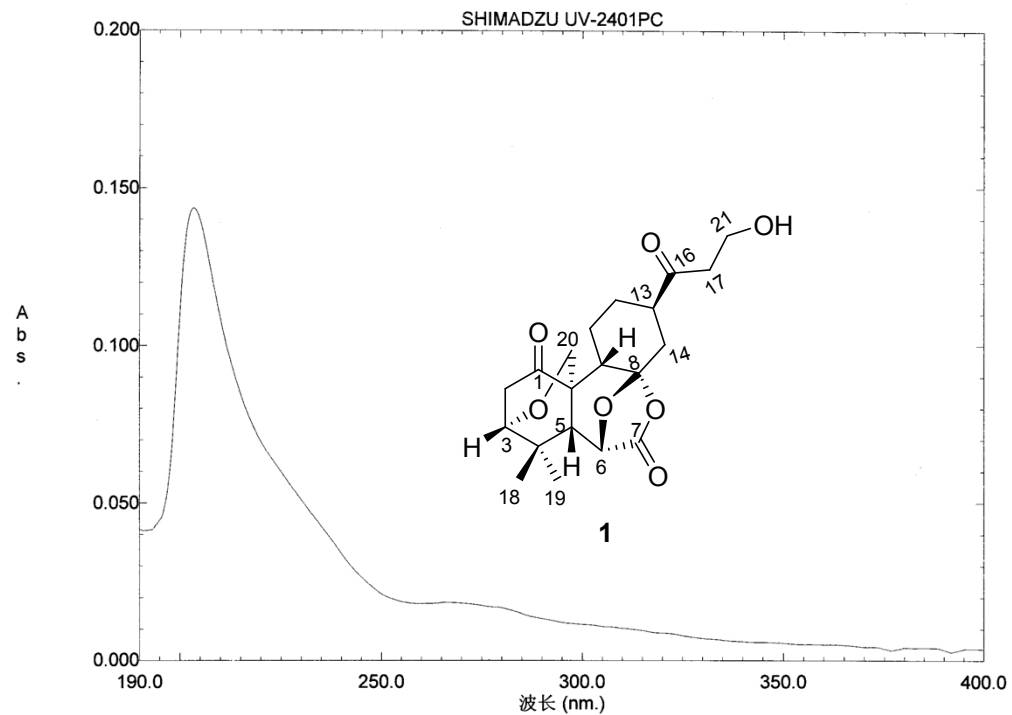

文件名: 11062700  
 样品名称: SAPPLE122

创建于: 14:11 11-06-26  
 数据: 原始

测量模式: Abs.  
 扫描速度: 中速  
 狭缝: 5.0  
 采样间隔: 0.2

11062700  
 样品浓度: 0.0350毫克/毫升  
 溶剂: 甲醇

| 否. | 波长 (nm.) | Abs.   |
|----|----------|--------|
| 1  | 203.40   | 0.1436 |

Figure S11. ORD spectrum of laxiflorol A (1)

Optical rotation measurement

Model : P-1020 (A060460638)

| No.  | Sample  | Mode   | Data     | Monitor<br>Blank  | Temp.<br>Cell<br>Temp Point | Date<br>Comment<br>Sample Name                           | Light<br>Filter<br>Operator | Cycle Time<br>Integ Time |
|------|---------|--------|----------|-------------------|-----------------------------|----------------------------------------------------------|-----------------------------|--------------------------|
| No.1 | 1 (1/3) | Sp.Rot | -29.0000 | -0.0145<br>0.0000 | 12.6<br>50.00<br>Cell       | Wed Mar 30 13:51:06 2011<br>0.00100g/mlMeOH<br>SAPPLE122 | Na<br>589nm                 | 2 sec<br>10 sec          |
| No.2 | 1 (2/3) | Sp.Rot | -29.2000 | -0.0146<br>0.0000 | 12.6<br>50.00<br>Cell       | Wed Mar 30 13:51:19 2011<br>0.00100g/mlMeOH<br>SAPPLE122 | Na<br>589nm                 | 2 sec<br>10 sec          |
| No.3 | 1 (3/3) | Sp.Rot | -30.6000 | -0.0153<br>0.0000 | 12.6<br>50.00<br>Cell       | Wed Mar 30 13:51:32 2011<br>0.00100g/mlMeOH<br>SAPPLE122 | Na<br>589nm                 | 2 sec<br>10 sec          |

*-29.6000°*

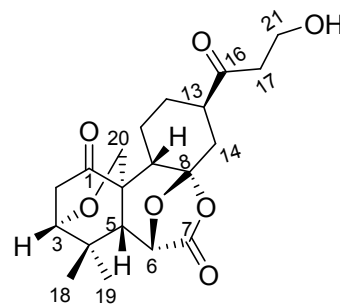

1



Figure S12.  $^{13}\text{C}$  NMR spectrum of laxiflorol B (**2**)

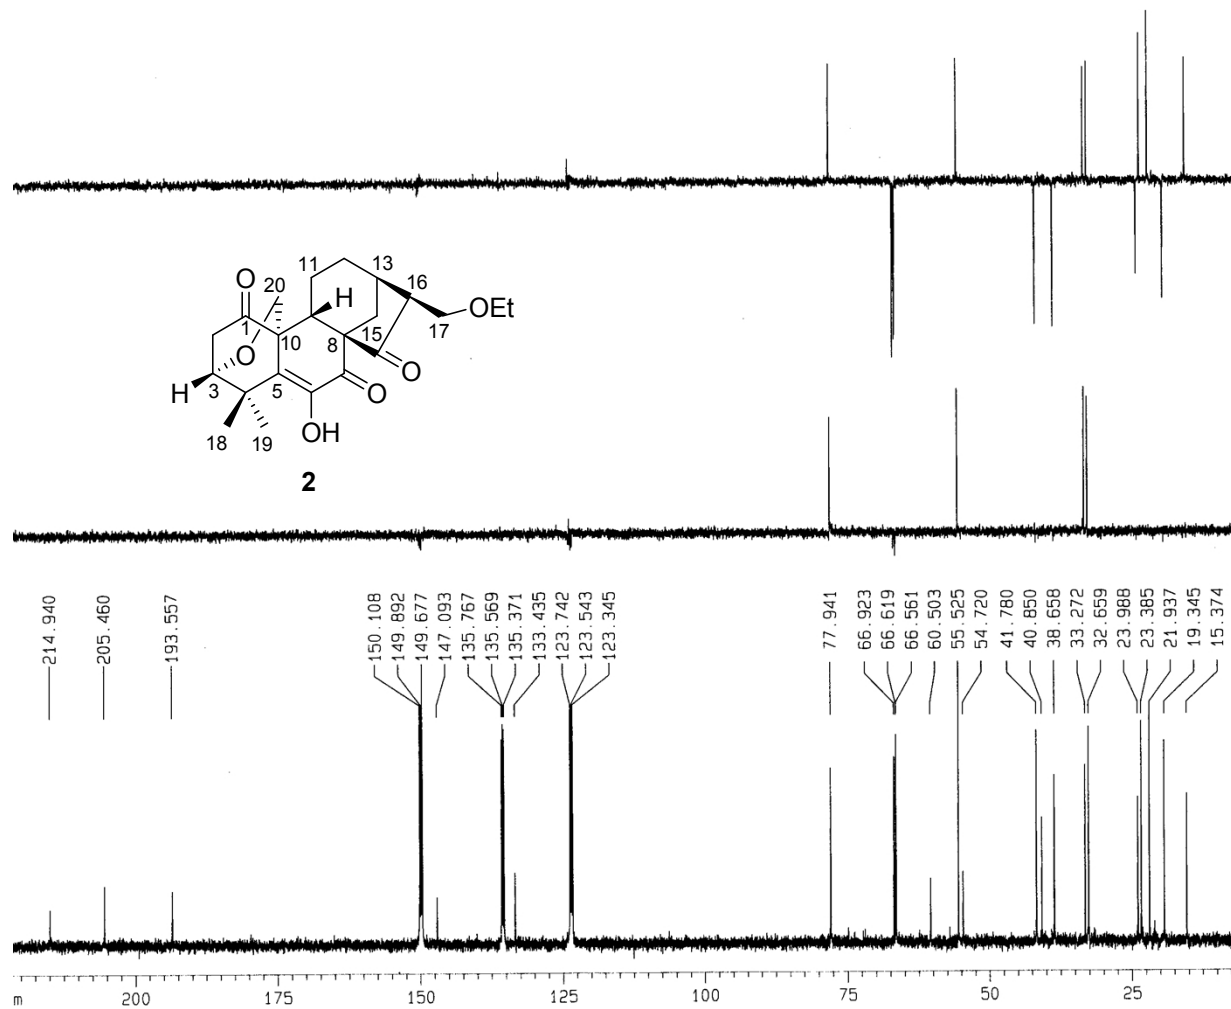

Figure S13. <sup>1</sup>H NMR spectrum of laxiflorol B (2)

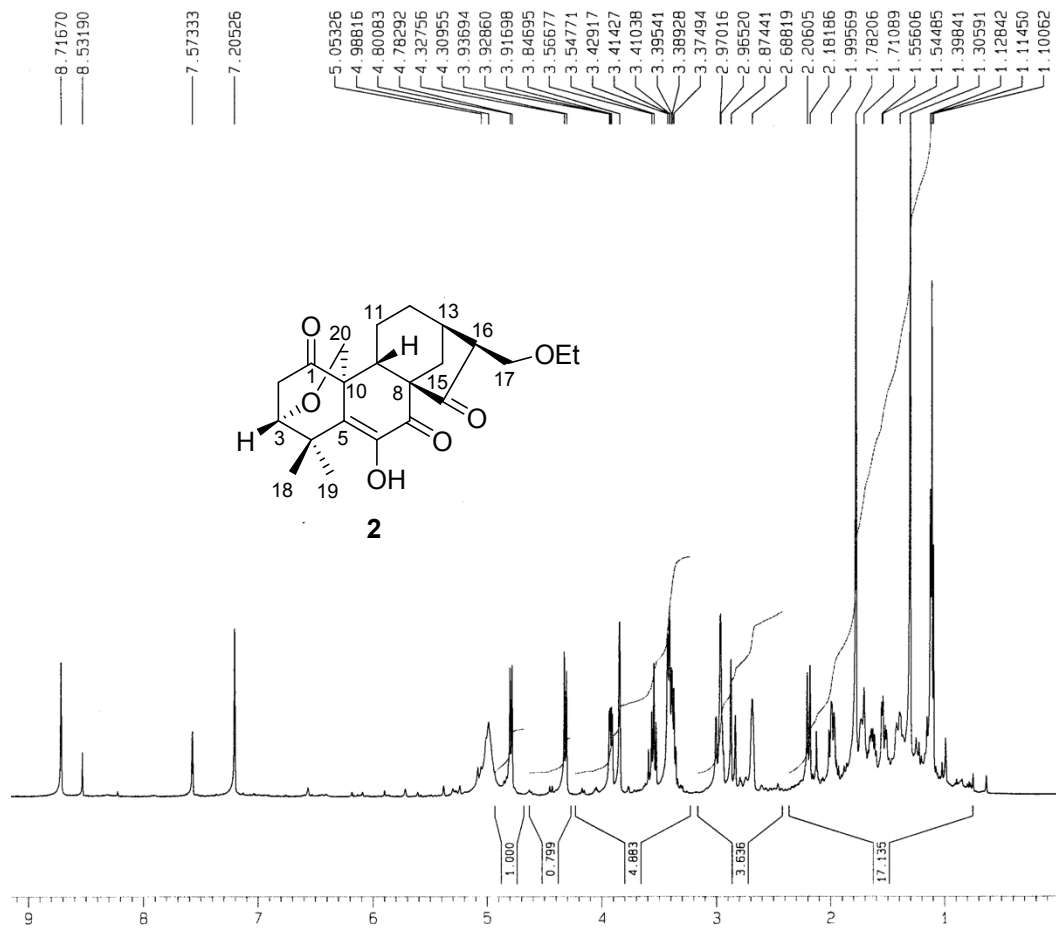

Figure S14. HSQC spectrum of laxiflorol B (2)

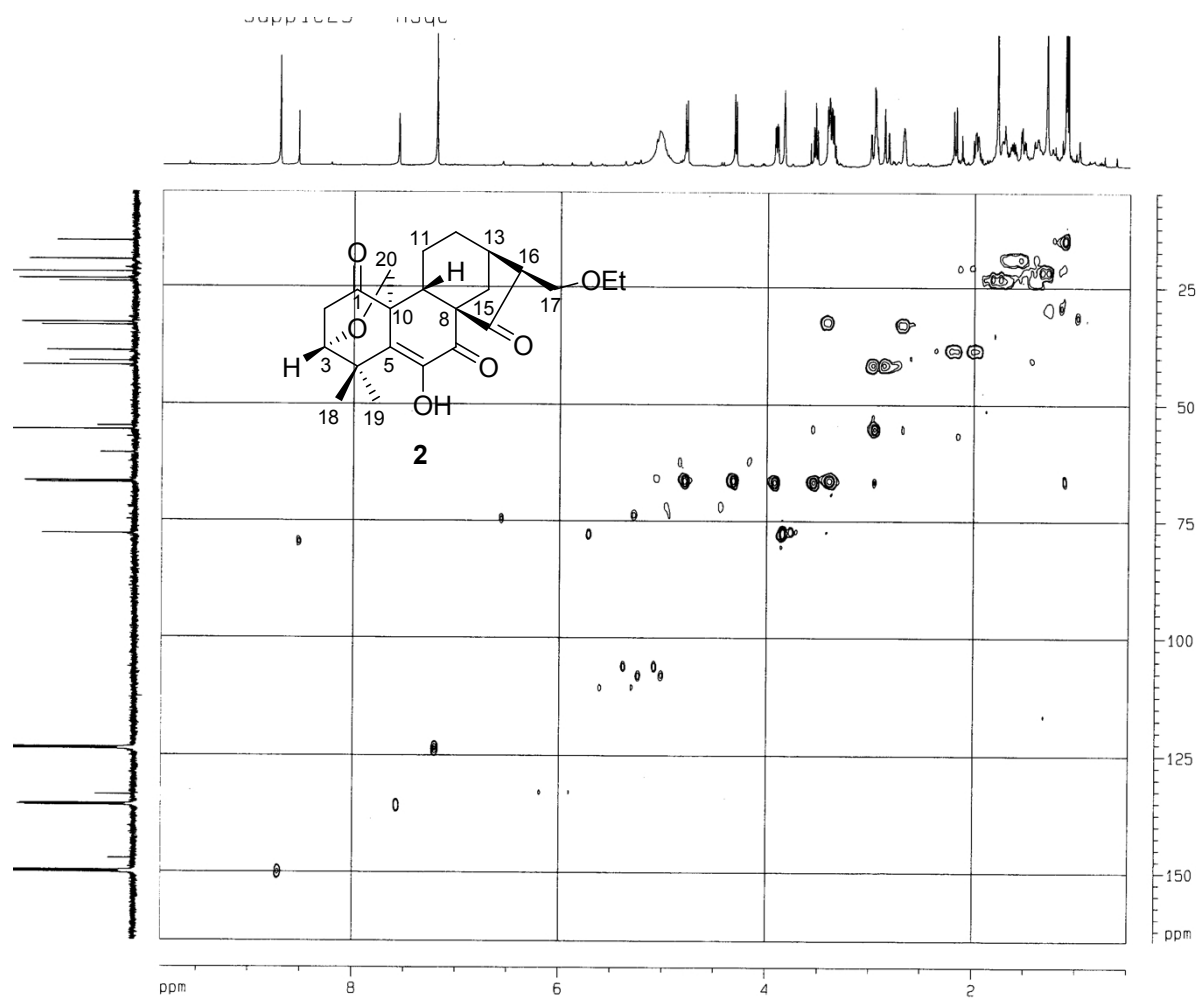

Figure S15.  $^1\text{H}$ - $^1\text{H}$  COSY spectrum of laxiflorol B (2)

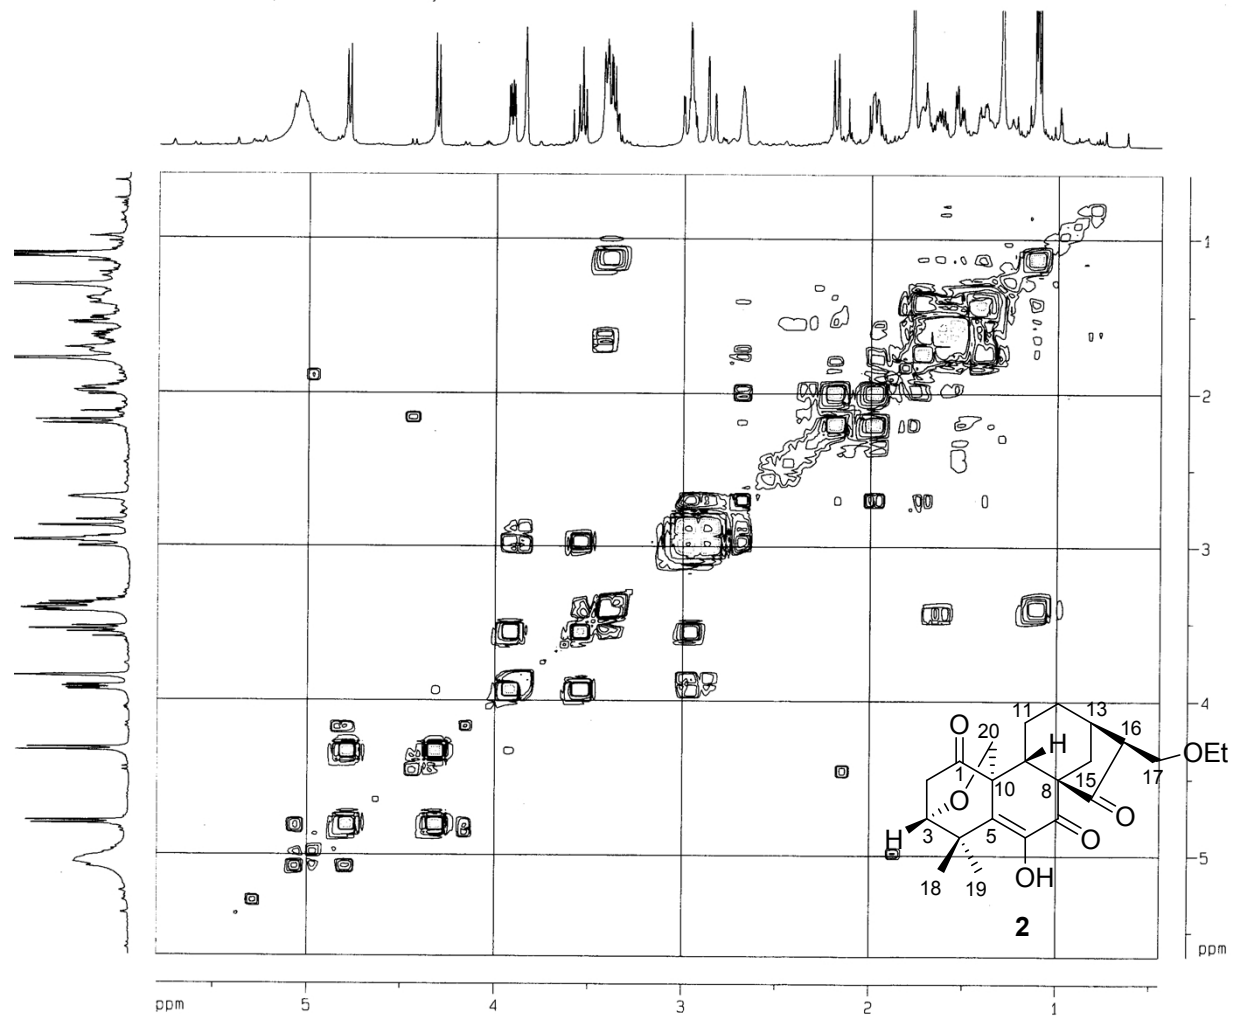

Figure S16. HMBC spectrum of laxiflorol B (2)

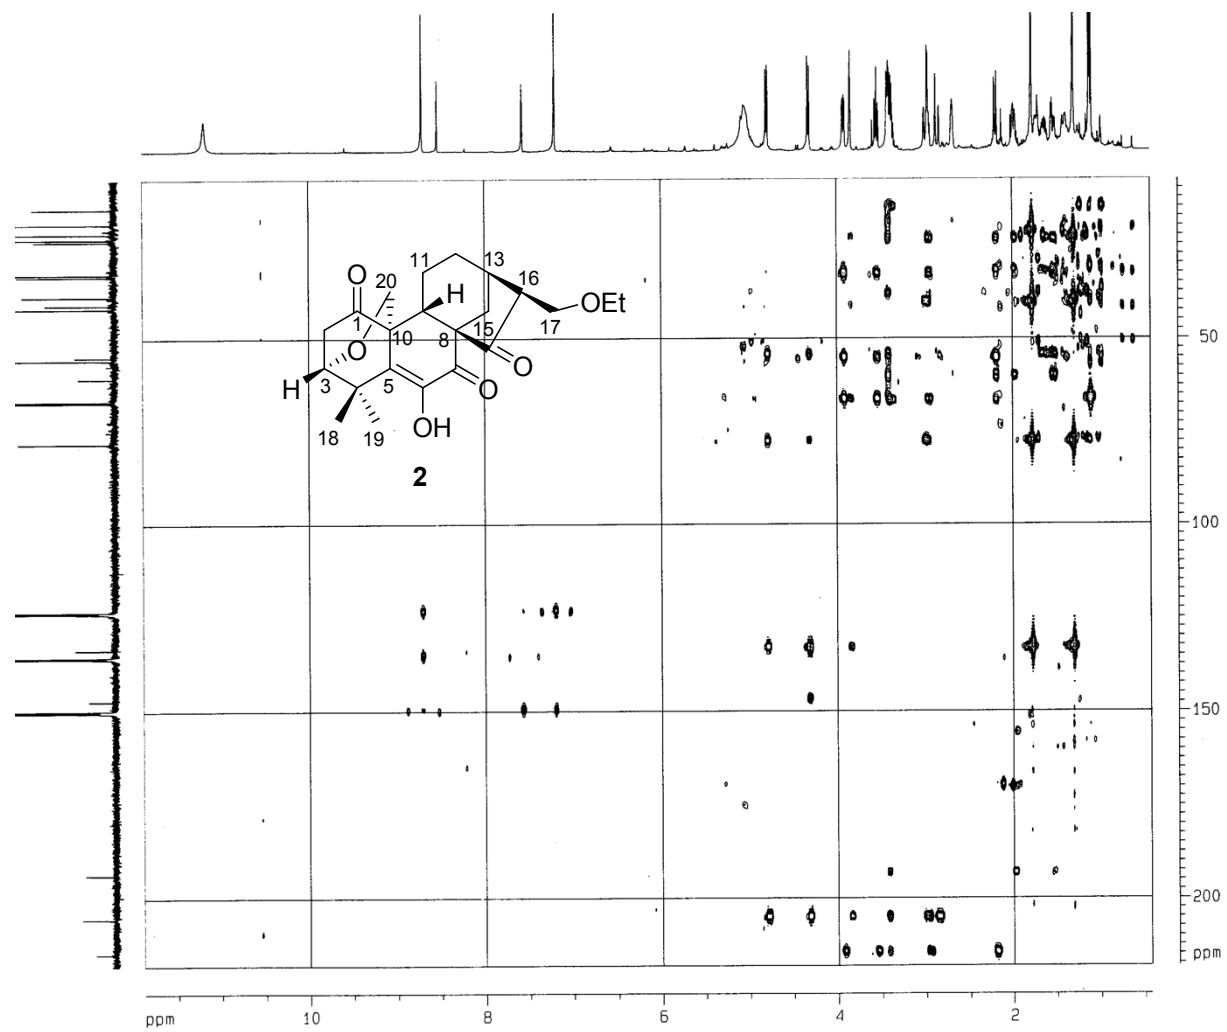

Figure S17. ROESY spectrum of laxiflorol B (2)

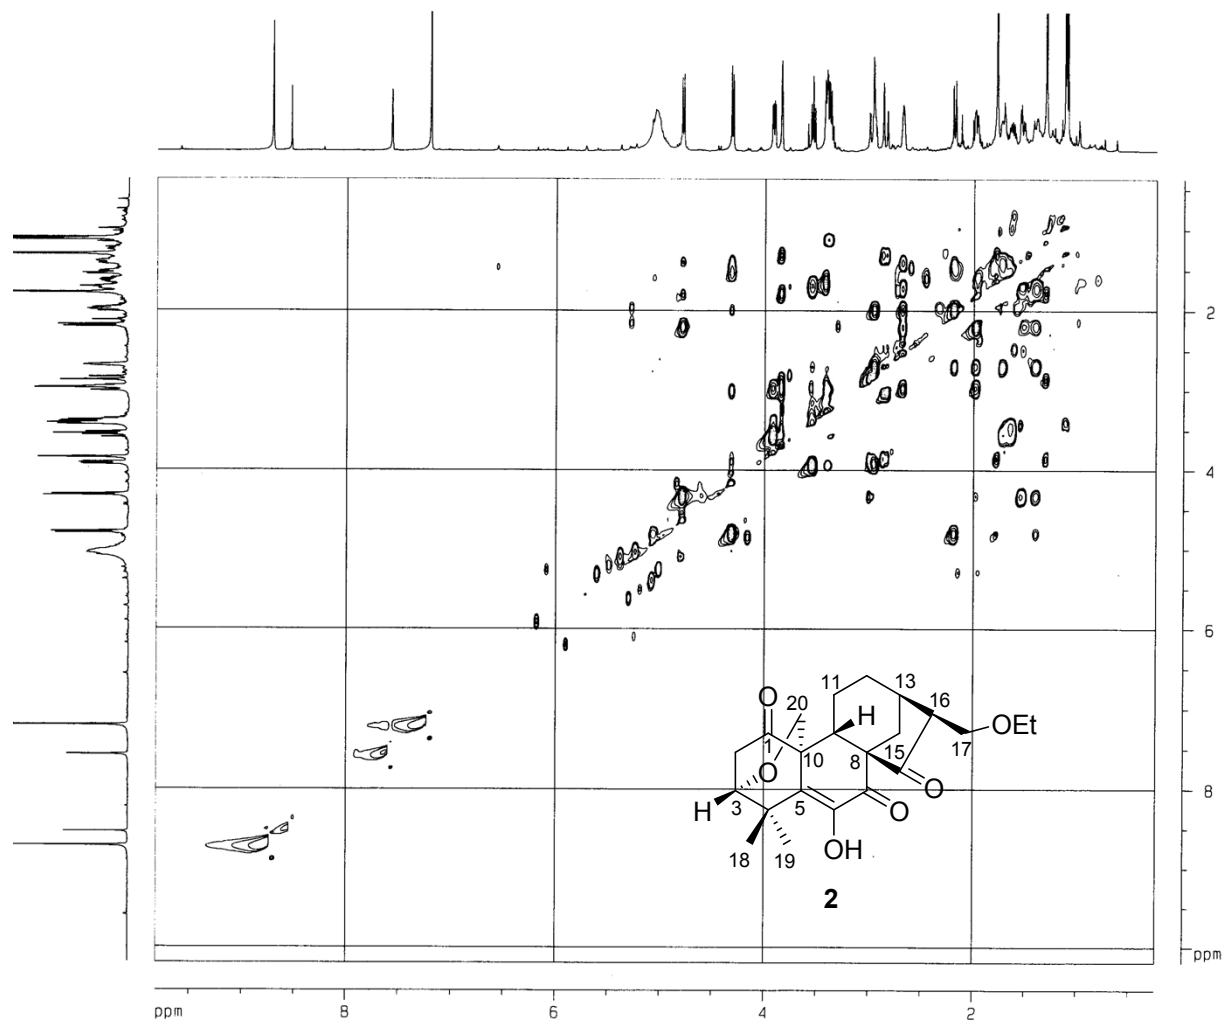

Figure S18. ESIMS spectrum of laxiflorol B (2)

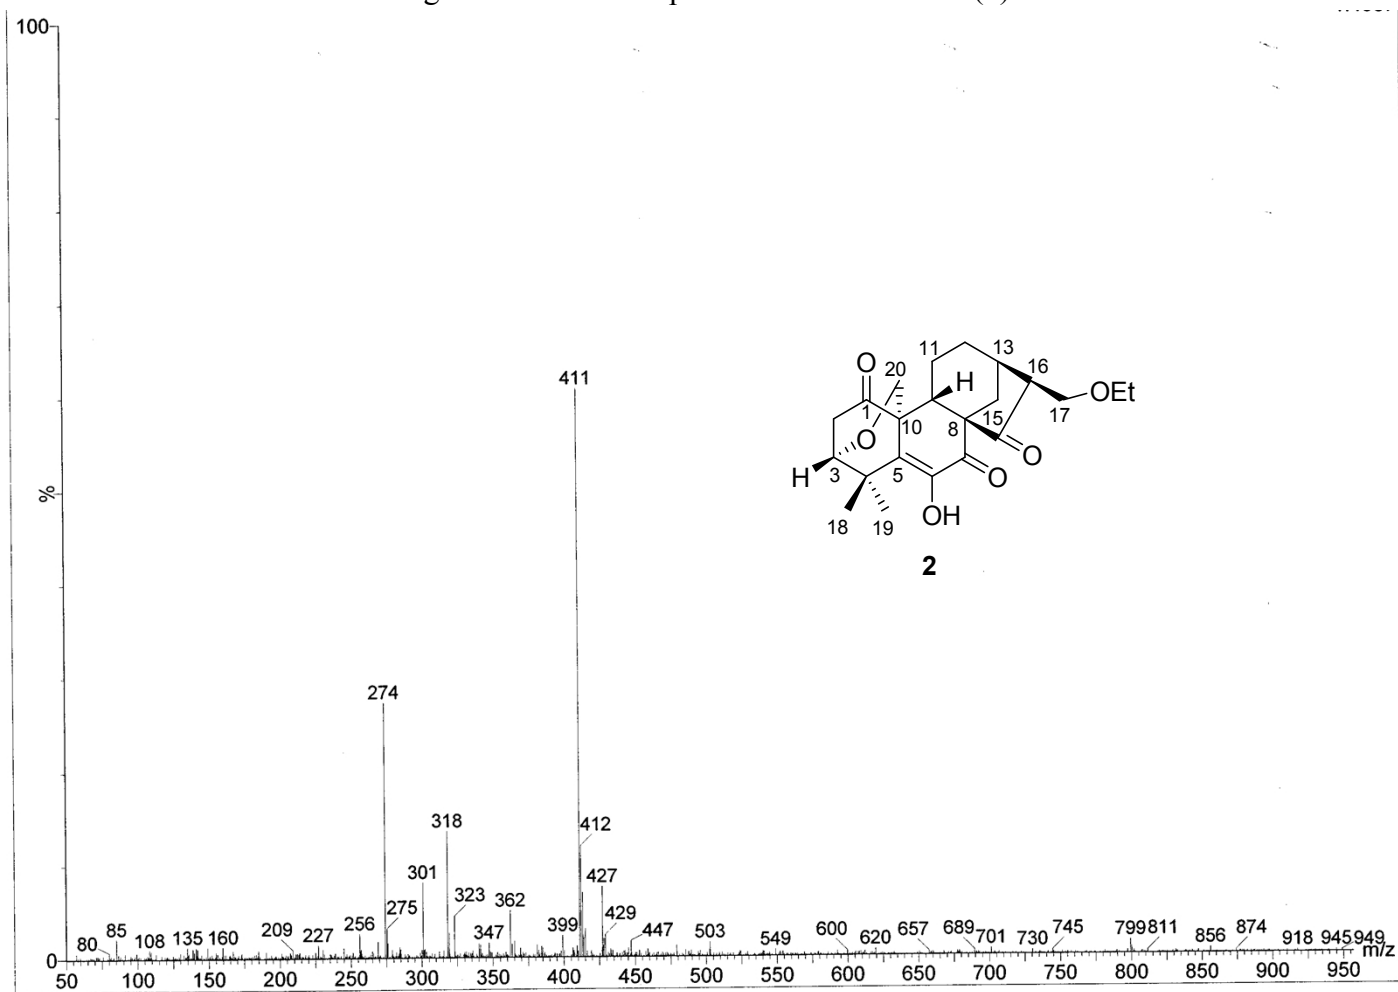

Figure S19. HRESIMS spectrum of laxiflorol B (2)

**Single Mass Analysis**

Tolerance = 10.0 PPM / DBE: min = -10.0, max = 120.0

Selected filters: None

Monoisotopic Mass, Odd and Even Electron Ions

18 formula(e) evaluated with 1 results within limits (up to 51 closest results for each mass)

Elements Used:

C: 0-200 H: 0-400 O: 5-7

Sapple29

16:10:06 29-Nov-2012

Voltage EI+

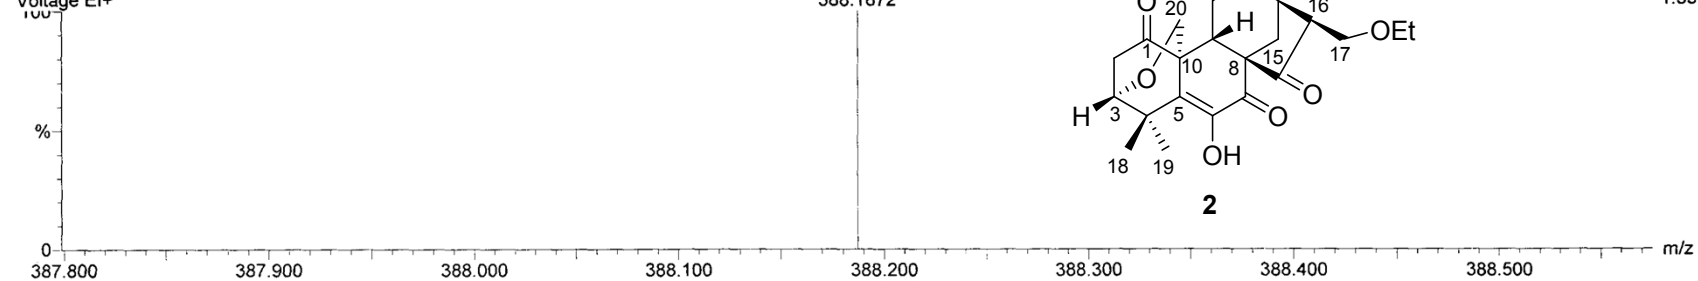

Autospec Premier  
P776  
1.33

Minimum: -10.0  
Maximum: 100.0 10.0 120.0

| Mass     | Calc. Mass | mDa  | PPM  | DBE | i-FIT     | Formula    |
|----------|------------|------|------|-----|-----------|------------|
| 388.1872 | 388.1886   | -1.4 | -3.6 | 9.0 | 5546025.5 | C22 H28 O6 |



Figure S20. UV spectrum of laxiflorol B (2)

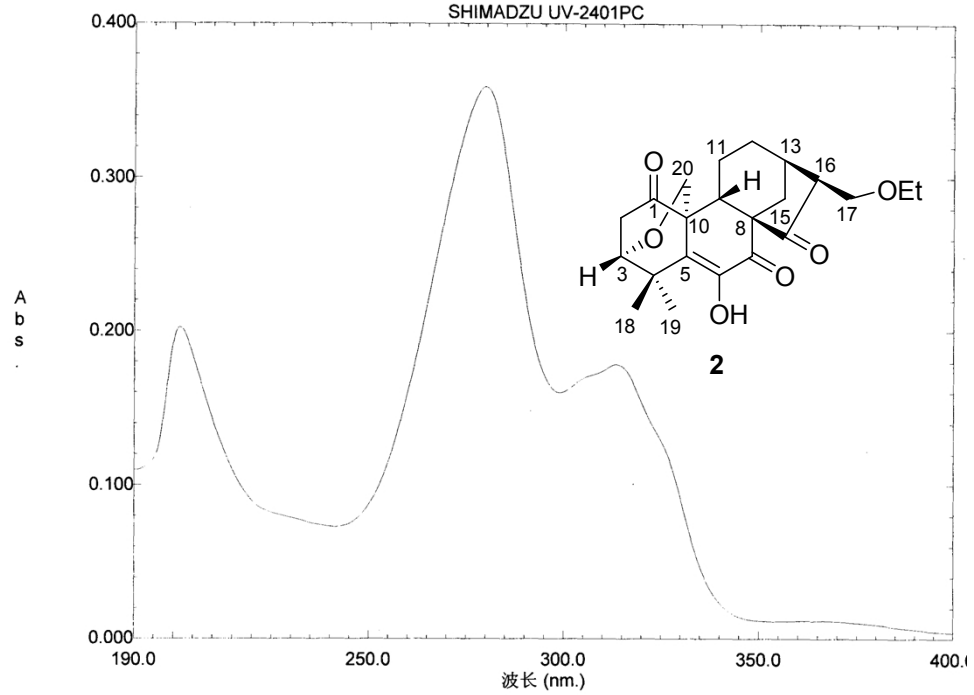

文件名: SAPPLE29

SAPPLE29

创建于: 16:19 12-11-27  
数据: 原始

样品浓度: 0.0338毫克/毫升  
溶剂: 甲醇

测量模式: Abs.  
扫描速度: 中速  
狭缝: 5.0  
采样间隔: 0.2

| 序 | 波长 (nm.) | Abs.   |
|---|----------|--------|
| 1 | 313.60   | 0.1782 |
| 2 | 279.80   | 0.3589 |
| 3 | 201.60   | 0.2023 |

Figure S21. IR spectrum of laxiflorol B (2)

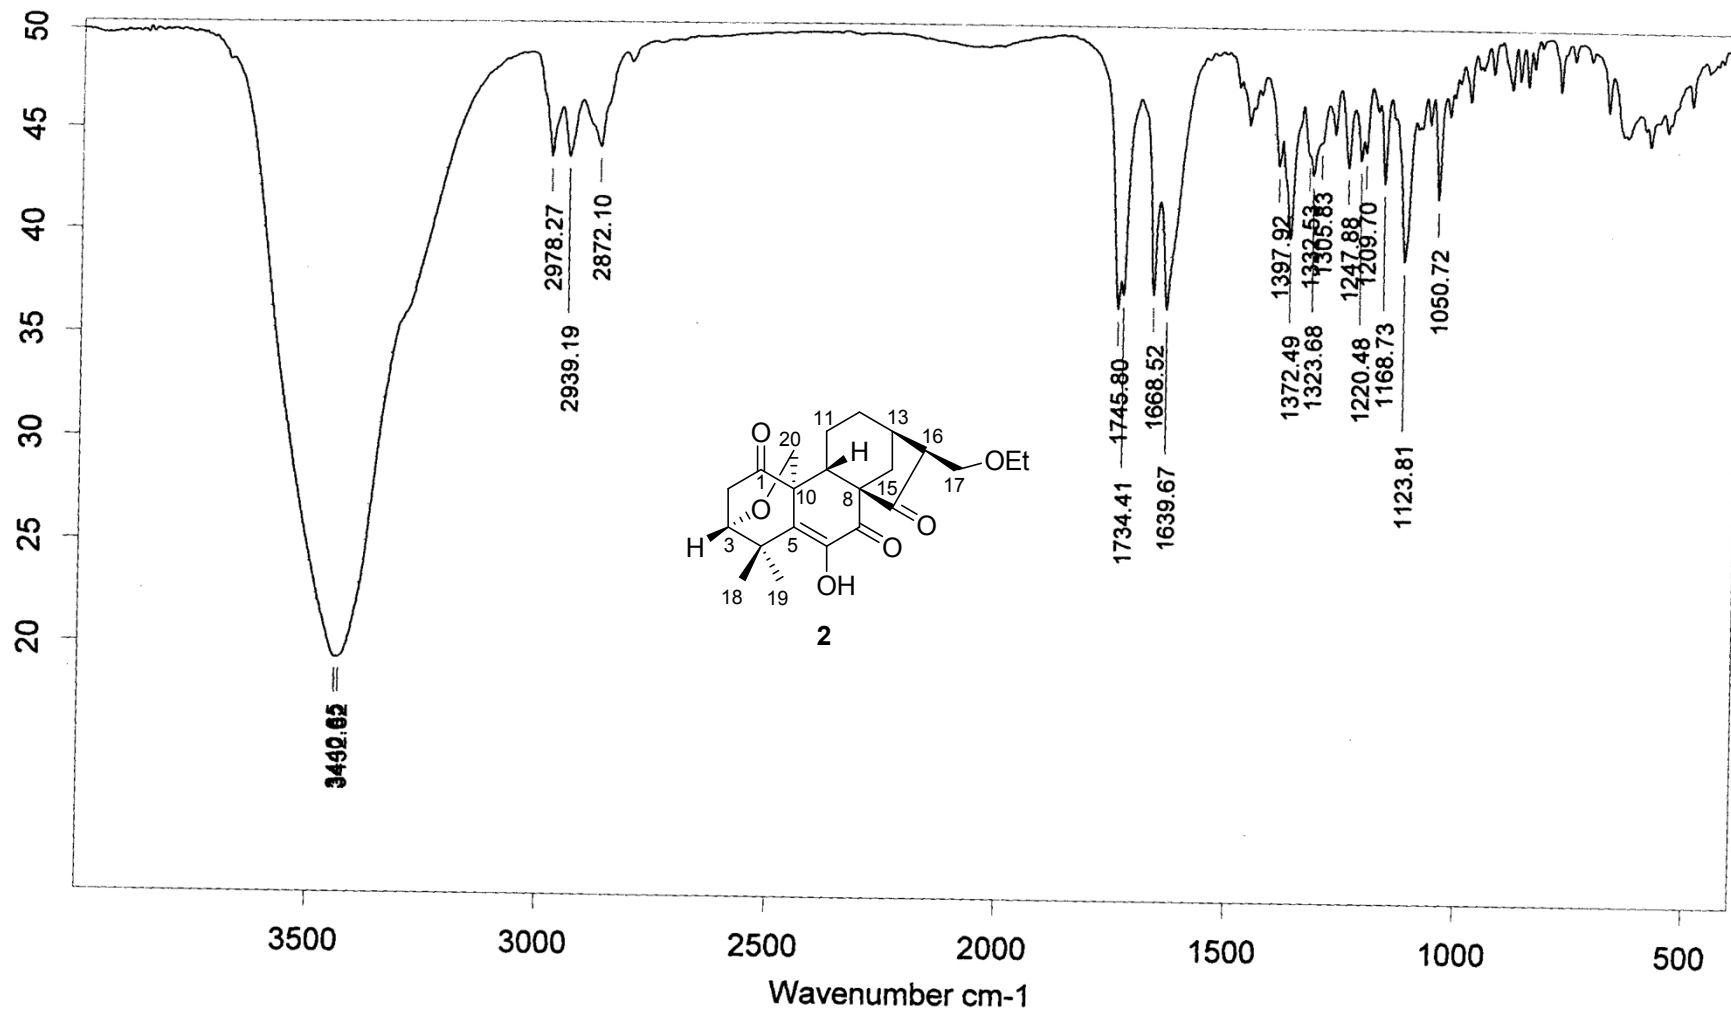

Figure S22. ORD spectrum of laxiflorol B (2)

Optical rotation measurement

Model : P-1020 (A060460638)

| No.  | Sample  | Mode   | Data     | Monitor Blank     | Temp. Cell Temp Point | Date Comment Sample Name                                | Light Filter Operator | Cycle Time Integ Time |
|------|---------|--------|----------|-------------------|-----------------------|---------------------------------------------------------|-----------------------|-----------------------|
| No.1 | 1 (1/3) | Sp.Rot | -50.6380 | -0.0357<br>0.0000 | 18.5<br>50.00         | Tue Nov 27 14:52:43 2012<br>0.00141g/mlMeOH<br>SAPPLE29 | Na<br>589nm           | 2 sec<br>10 sec       |
| No.2 | 1 (2/3) | Sp.Rot | -51.0640 | -0.0360<br>0.0000 | 18.6<br>50.00         | Tue Nov 27 14:52:57 2012<br>0.00141g/mlMeOH<br>SAPPLE29 | Na<br>589nm           | 2 sec<br>10 sec       |
| No.3 | 1 (3/3) | Sp.Rot | -50.3550 | -0.0355<br>0.0000 | 18.5<br>50.00         | Tue Nov 27 14:53:10 2012<br>0.00141g/mlMeOH<br>SAPPLE29 | Na<br>589nm           | 2 sec<br>10 sec       |

*-50.6380°*

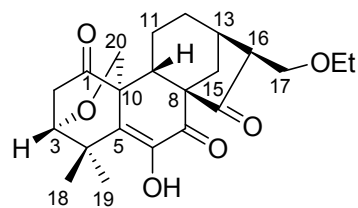

2

Figure S23. X-ray structure of laxiflorol B (2)

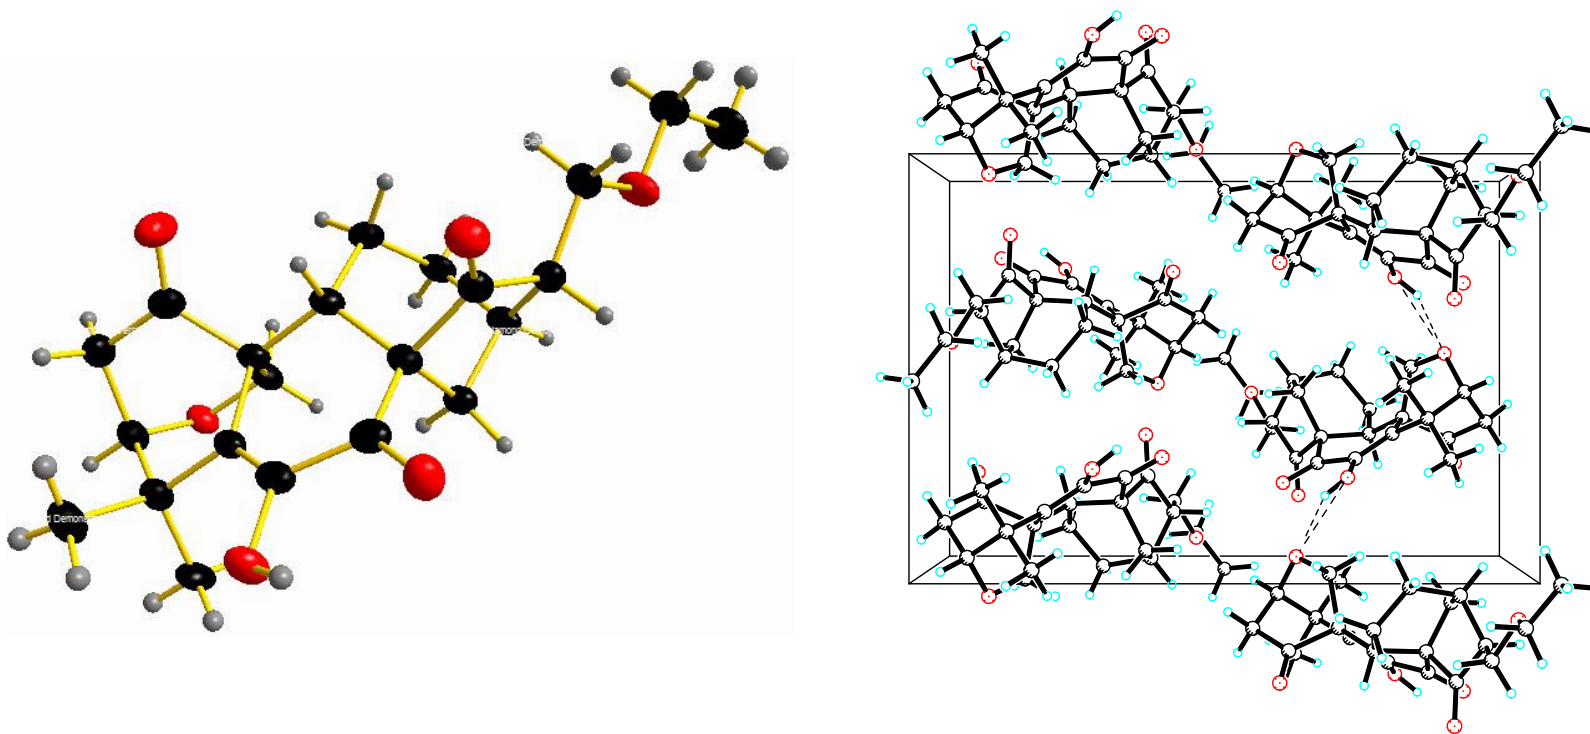

**Table S1** NMR Spectroscopic Data ( $\delta$  in ppm,  $J$  in Hz) of Compound **2**<sup>a</sup>

| no.                               | $\delta_{\text{H}}$                  | $\delta_{\text{C}}$ |
|-----------------------------------|--------------------------------------|---------------------|
| 1                                 | -                                    | 205.5 s             |
| 2                                 | 2.97 br d (19.4)<br>2.87 br d (19.4) | 41.8 t              |
| 3                                 | 3.85 br s                            | 77.9 d              |
| 4                                 | -                                    | 40.9 s              |
| 5                                 | -                                    | 133.4 s             |
| 6                                 | -                                    | 147.1 s             |
| 7                                 | -                                    | 193.6 s             |
| 8                                 | -                                    | 60.5 s              |
| 9                                 | 3.39 overlap                         | 32.7 d              |
| 10                                | -                                    | 54.7 s              |
| 11                                | 1.55 m<br>1.45 m                     | 19.3 t              |
| 12                                | 1.71 m                               | 24.0 t              |
| 12                                | 1.40 m                               |                     |
| 13                                | 2.69 br s                            | 33.3 d              |
| 14                                | 2.19 d (12.0)<br>2.00 d (12.0)       | 38.7 t              |
| 15                                | -                                    | 214.9 s             |
| 16                                | 2.97 overlap                         | 55.5 d              |
| 17                                | 3.92 m<br>3.55 m                     | 66.9 t              |
| 18                                | 1.31 s                               | 23.4 q              |
| 19                                | 1.78 s                               | 21.9 q              |
| 20                                | 4.79 d (8.9)<br>4.31 d (8.9)         | 66.6 t              |
| CH <sub>3</sub> CH <sub>2</sub> O | 3.39 overlap<br>1.14 d (6.0)         | 66.6 t<br>15.4 q    |

<sup>a</sup>Data were recorded in C<sub>5</sub>D<sub>5</sub>N on a Bruker AM 500MHz spectrometer

## Detailed experimental procedures

### 1. *General Experimental procedures*

Optical rotations were measured with a JASCO DIP-370 digital polarimeter. UV data were obtained on a Shimadzu UV-2401A spectrophotometer. CD spectra were measured on a Chirascan instrument. A BioRad FtS-135 spectrophotometer was used for scanning IR spectroscopy with KBr pellets. 1D NMR spectra and <sup>1</sup>H-<sup>1</sup>H COSY, HMBC, ROESY spectra were recorded on DRX-600 spectrometers. HSQC and HSQC-TOSY spectra were recorded on DRX-500 spectrometers. Unless otherwise specified, chemical shifts ( $\delta$ ) were expressed in ppm with reference to the solvent signals. High-resolution electrospray-ionization (HRESIMS) were performed on a VG Autospec-3000 spectrometer under 70 eV. Column chromatography was performed with silica gel (100-200 mesh; Qingdao Marine Chemical, Inc., Qingdao, People's Republic of China). Preparative HPLC was performed on a Shimadzu LC-8A preparative liquid chromatograph with a Shimadzu PRC-ODS (K) column. Fractions were monitored by TLC and spots were visualized by heating silica gel plates sprayed with 8% H<sub>2</sub>SO<sub>4</sub> in EtOH. All solvents including petroleum ether (60-90 °C) were distilled prior to use.

### 2. *Plant material*

The leaves of *Isodon eriocalyx* var. *laxiflora* were collected from Yunnan province, People's Republic of China, in September 2008. Voucher specimens (KIB20080028) were deposited at the State Key Laboratory of Phytochemistry and Plant Resources in West China, Kunming Institute of Botany, Chinese Academy of Sciences, and were identified by Prof. Xi-Wen Li.

### 3. Extraction and isolation

The air-dried leaves of *Isodon eriocalyx* var. *laxiflora* (10 Kg) were extracted with 70% aqueous acetone (3 × 40 L, 2 days each) at room temperature. The solvent was evaporated in vacuo to afford a crude extract (1.2 kg), which was suspended in H<sub>2</sub>O, and then extracted successively with EtOAc and n-BuOH. The EtOAc-soluble part (600 g) was decolorized on MCI gel with 90% MeOH/H<sub>2</sub>O to obtain a yellow gum (427.5 g). The gum was purified by CC (column chromatography on SiO<sub>2</sub> with CHCl<sub>3</sub>-Me<sub>2</sub>CO gradient system 1:0, 9:1, 8:2, 7:3, 6:4 and 1:1) to yield six main fractions, Fr. A-F. Fr. C (CHCl<sub>3</sub>/acetone 8:2, 30 g) eluting with CHCl<sub>3</sub>/CH<sub>3</sub>OH (90:1, 60:1 and 30:1), and yield subfractions C1-C5. Subfraction C1 (10 g, CHCl<sub>3</sub>/ CH<sub>3</sub>OH 90:1) was fragmented by repeated CC, first on on RP-18 with a gradien elution of MeOH/H<sub>2</sub>O (20:80 to 100:0) to yield fractions C1/1–C1/5, Subsequently fraction C1/3 (3.56 g) was purified by a silica gel column (CHCl<sub>3</sub>/ isopropyl alcohol 90:1 to 30:1) to give subfractions C1/3/1-C1/3/5. Compound **2** (12 mg) was crystallized from subfraction C1/3/1 (160 mg).

Fr. D (CHCl<sub>3</sub>/acetone 7:3, 50 g) eluting with CHCl<sub>3</sub>/CH<sub>3</sub>OH (30:1, 20:1 and 10:1), and yield subfractions D1-D3. Subfraction D1 (20 g, CHCl<sub>3</sub>/ CH<sub>3</sub>OH 30:1) was fragmented by repeated CC, first on on RP-18 with a gradien elution of MeOH/H<sub>2</sub>O (20:80 to 100:0) to yield fractions D1/1–D1/8, Subsequently fraction D1/3 (2.27 g) was purified by a silica gel column (CHCl<sub>3</sub>/ MeOH 50:1 to 10:1) to give subfractions D1/3/1-D1/3/8. Compound **1** (3 mg) was precipitated from subfraction D1/3/4 (80 mg) by preparative HPLC (20 mL/min, detector UV  $\lambda_{\max}$  210 nm, MeCN/H<sub>2</sub>O 30:70).

3.1 Laxiflorol A (**1**), White, amorphous powder.  $[\alpha]_{12.6}^D = -29.6$  ( $c$  0.10, MeOH). UV (MeOH)  $\lambda_{\max}$  ( $\log \epsilon$ ): 203.4 (2.5) nm; Positive ESIMS:  $m/z$  401  $[M + Na]^+$ ; For  $^1H$  and  $^{13}C$  spectroscopic data, see Table 1; positive HRESIMS  $[M + Na]^+$   $m/z$  401.1571 (calcd for  $C_{20}H_{26}O_7Na$ , 401.1576).

3.2 Laxiflorol B (**2**), Colorless needle crystals.  $[\alpha]_{18.5}^D = -50.7$  ( $c$  0.14, MeOH). UV (MeOH)  $\lambda_{\max}$  ( $\log \epsilon$ ): 201.6 (2.7), 279.8 (2.9), 313.6 (2.6) nm; IR (KBr)  $\nu_{\max}$  3440, 2978, 2939, 2872, 1746, 1734, 1668, 1639, 1397, 1323, 1220, 1123, 1050  $cm^{-1}$ ; For  $^{13}C$  and  $^1H$  spectroscopic data, see Table S1; Positive ESIMS:  $m/z$  411  $[M + Na]^+$ ; positive HREIMS  $[M]^+$   $m/z$  388.1872 (calcd for  $C_{22}H_{28}O_6$ , 388.1886).

X-ray Crystal Structure Analysis of laxiflorol B (**2**):  $C_{22}H_{28}O_6$ ,  $M = 388.44$ , orthorhombic,  $a = 9.4749(3)$  Å  $b = 11.6421(3)$  Å  $c = 17.1244(5)$  Å  $\alpha = 90.00^\circ$ ,  $\beta = 90.00^\circ$ ,  $\gamma = 90.00^\circ$ ,  $V = 1888.95(9)$  Å<sup>3</sup>,  $T = 100(2)$  K, space group  $P212121$ ,  $Z = 4$ , 9900 reflections measured, 3262 independent reflections ( $R_{int} = 0.0350$ ). The final  $R_I$  values were 0.0354 ( $I > 2\sigma(I)$ ). The final  $wR(F^2)$  values were 0.0987 ( $I > 2\sigma(I)$ ). The final  $R_I$  values were 0.0354 (all data). The final  $wR(F^2)$  values were 0.0988 (all data). Flack parameter = -0.03(15).

The intensity data for laxiflorol B was collected on a Bruker APEX DUO diffractometer using graphite-monochromated Cu  $K\alpha$  radiation. Its structure was solved by direct methods (SHELXS97), expanded using difference Fourier techniques, and refined by the program and full-matrix least-squares calculations. The nonhydrogen atoms were refined anisotropically, and hydrogen atoms were fixed at calculated positions. Crystallographic data for the structure of laxiflorol B has been deposited in the Cambridge Crystallographic Data Centre (deposition number CCDC 970056). Copies of the data can be obtained free of charge from the CCDC via [www.ccdc.cam.ac.uk](http://www.ccdc.cam.ac.uk).

#### 4. *Synthesis of acetic ester of 1*

We have try to synthesize the 21-acetic ester of **1** in order to get its single crystal, but we failed.



Compound **1** (2.5 mg) was dissolved in CH<sub>2</sub>Cl<sub>2</sub> (1 mL). To this solution, acetic oxide chloride (3 mg), triethylamine (0.1 ml), and DMAP (0.5 mg) were added in small portions over a period of 24 h with stirring at 60 °C; then, solvent was evaporated from the resulting mixture. The crude residue has not found the compound **1** and 21-acetic ester of **1**.

### **5. Cellular Proliferation Assay**

Colorimetric assays were performed to evaluate compound activity. The following human tumor cell lines were used: the A549 lung cancer cell line, the HL-60 human myeloid leukemia cell line, the MCF-7 breast cancer cell line, the SMMC-7721 human hepatocarcinoma cell line, and the SW-480 human pancreatic carcinoma. All cells were cultured in RPMI-1640 or DMEM medium (Hyclone, Logan, UT), supplemented with 10% fetal bovine serum (Hyclone) at 37 °C in a humidified atmosphere with 5% CO<sub>2</sub>. Cell viability was assessed by conducting colorimetric measurements of the amount of insoluble formazan formed in living cells based on the reduction of 3-(4,5-dimethylthiazol-2-yl)-2,5-diphenyltetrazolium bromide (MTT) (Sigma, St. Louis, MO). Briefly, 100 μL adherent cells were seeded into each well of a 96-well cell culture plate and allowed to adhere for 12 h before drug addition, while suspended cells were seeded just before drug addition, both with initial density of 1 × 10<sup>5</sup> cells/mL in 100 μL of medium. Each tumor cell line was exposed to the test compound at various concentrations in triplicate for 48 h, with *cis*-Platin (Sigma) as positive control. After the incubation, MTT (100 μg) was added to each well, and the incubation continued for 4 h at 37 °C. The cells were lysed with 100 μL of 20% SDS-50% DMF after removal of 100 μL of medium. The optical density of the lysate was measured at 595 nm in a 96-well microtiter plate reader (Bio-Rad 680). The IC<sub>50</sub> value of each compound was calculated by Reed and Muench's method.

### **5. ECD Calculation and molecular orbital analysis**

The theoretical calculations of compounds **1** and 6,8-*epi*-**1** were carried out using Gaussian 09.<sup>1</sup> Conformational analysis was initially performed using Discovery

Studio 3.5 Client. The optimized conformation geometries, thermodynamic parameters, and populations of all conformations were provided in Figures S24 and S25 and Tables S2–S8. The conformers were then optimized at B3LYP/6-31G(d,p) level. Room-temperature equilibrium populations were calculated according to Boltzmann distribution law. The theoretical calculation of ECD was performed using time-dependent density-functional theory (TDDFT) at B3LYP/6-31++G(d,p) level in methanol with PCM model and in the gas phase. The ECD spectra of compounds **1** and *6,8-epi-1* were obtained by weighing the Boltzmann distribution rate of each geometric conformation.

The ECD spectra are simulated by overlapping Gaussian functions for each transition according to

$$\Delta\epsilon(E) = \frac{1}{2.297 \times 10^{-39}} \times \frac{1}{\sqrt{2\pi\sigma}} \sum_i^A \Delta E_i R_i e^{-[(E-E_i)/(2\sigma)]^2}$$

where  $\sigma$  represents the width of the band at  $1/e$  height, and  $\Delta E_i$  and  $R_i$  are the excitation energies and rotational strengths for transition  $i$ , respectively.  $\sigma = 0.20$  eV and  $R^{\text{velocity}}$  have been used in this work.

The orbital information (NBO plot files) was generated by NBO program of Gaussian 09.<sup>2</sup> The predominantly populated conformers were selected for molecular orbital (MO) analysis. NBO plot files were used to generate corresponding Gaussian-type grid file by Multiwfn 2.4.<sup>3</sup> After that, the isosurface of generated grid data was afforded by VMD software.<sup>4</sup>

**Figure S24.** Optimized geometries of conformers of **1** at the B3LYP/6-31G(d,p) level in the gas phase.

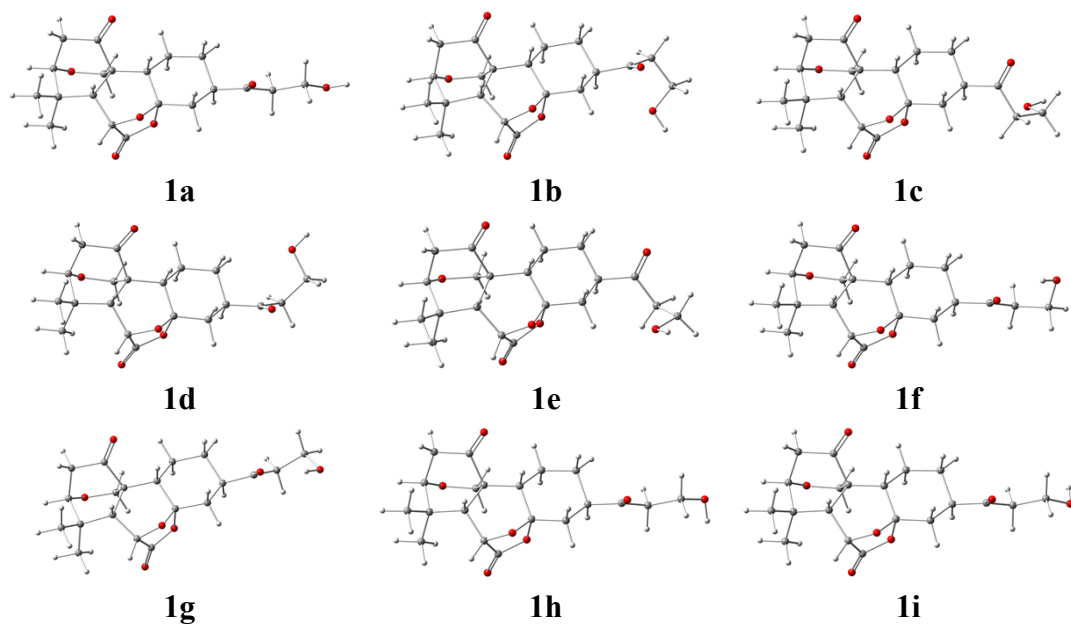

**Table S2.** Important thermodynamic parameters (a.u.) of the optimized **1** at B3LYP/6-31G(d,p) level in the gas phase.

| Species   | $E$          | $E'=E+ZPE$   | $H$          | $G$          |
|-----------|--------------|--------------|--------------|--------------|
| <b>1a</b> | -1303.902524 | -1303.926618 | -1303.90158  | -1303.979668 |
| <b>1b</b> | -1303.902036 | -1303.926008 | -1303.901092 | -1303.979255 |
| <b>1c</b> | -1303.901131 | -1303.925113 | -1303.900187 | -1303.978558 |
| <b>1d</b> | -1303.903049 | -1303.927012 | -1303.902105 | -1303.979820 |
| <b>1e</b> | -1303.902307 | -1303.926234 | -1303.901362 | -1303.978796 |
| <b>1f</b> | -1303.907035 | -1303.930688 | -1303.906090 | -1303.983080 |
| <b>1g</b> | -1303.907417 | -1303.931063 | -1303.906473 | -1303.983651 |
| <b>1h</b> | -1303.902044 | -1303.926137 | -1303.9011   | -1303.979325 |
| <b>1i</b> | -1303.901911 | -1303.925992 | -1303.900967 | -1303.979133 |

$E$ ,  $E'$ ,  $H$ ,  $G$ : total energy, total energy with zero point energy (ZPE), enthalpy, and Gibbs free energy.

**Table S3.** Conformational analysis of **1**.

| Species   | $\Delta E^a$ | $P_E\%^b$ | $\Delta E'^c$ | $P_E\%^d$ | $\Delta G^e$ | $P_G\%^f$ |
|-----------|--------------|-----------|---------------|-----------|--------------|-----------|
| <b>1a</b> | 3.07         | 0.3       | 2.79          | 0.5       | 2.50         | 0.9       |
| <b>1b</b> | 3.38         | 0.2       | 3.17          | 0.3       | 2.76         | 0.6       |
| <b>1c</b> | 3.94         | 0.1       | 3.73          | 0.1       | 3.20         | 0.3       |
| <b>1d</b> | 2.74         | 0.6       | 2.54          | 0.8       | 2.40         | 1.1       |
| <b>1e</b> | 3.21         | 0.3       | 3.03          | 0.3       | 3.05         | 0.4       |
| <b>1f</b> | 0.24         | 39.2      | 0.24          | 39.1      | 0.36         | 33.8      |
| <b>1g</b> | 0.00         | 58.9      | 0.00          | 58.2      | 0.00         | 61.9      |
| <b>1h</b> | 3.37         | 0.2       | 3.09          | 0.4       | 2.71         | 0.5       |
| <b>1i</b> | 3.46         | 0.2       | 3.18          | 0.3       | 2.84         | 0.5       |

<sup>a</sup>Relative energy, <sup>c</sup>relative energy with ZPE, and <sup>e</sup>relative Gibbs free energy in kcal/mol.

<sup>b,d,f</sup>Conformational distribution calculated by using the respective parameters above at B3LYP/6-31G(d,p) level in the gas phase. T=298 K.

**Table S4.** Key transitions, oscillator strengths, and rotatory strengths in the ECD spectra of conformer **1** at B3LYP-SCRF/6-31++G(d,p)//B3LYP/6-31G(d,p) level with PCM model in methanol.

| Species   | Exited State | $\Delta E^a$ (eV) | $\lambda^b$ (nm) | $f^c$  | $R_{vel}^d$ | $R_{len}^e$ |         |
|-----------|--------------|-------------------|------------------|--------|-------------|-------------|---------|
| <b>1f</b> | 101->102     | 4.2793            | 289.73           | 0.0005 | 6.9803      | 7.3201      |         |
|           | 100->103     | 4.4072            | 281.32           | 0.0014 | 9.4345      | 8.1872      |         |
|           | 99->102      | 5.0487            | 245.58           | 0.0007 | -2.7267     | -3.1319     |         |
|           | 101->104     | 5.3688            | 230.94           | 0.0066 | 5.0672      | 5.2544      |         |
|           | 101->103     | 5.4076            | 229.28           | 0.0004 | -1.3869     | -1.4749     |         |
|           | 101->104     | 5.5650            | 222.79           | 0.0007 | -9.8056     | -9.5454     |         |
|           | 100->102     | 5.6033            | 221.27           | 0.0001 | 0.8481      | 0.9349      |         |
|           | 98->103      | 5.6081            | 221.08           | 0.0009 | -1.8228     | -1.4719     |         |
|           | 99->103      | 5.8446            | 212.14           | 0.0001 | 0.2589      | 0.2994      |         |
|           | 97->102      | 5.9039            | 210.00           | 0.0022 | -3.6361     | -3.5515     |         |
|           | 99->104      | 5.9360            | 208.87           | 0.0073 | -3.4002     | -3.3726     |         |
|           | 100->104     | 6.0667            | 204.37           | 0.0005 | 2.8597      | 2.8648      |         |
|           | 96->102      | 6.1368            | 202.04           | 0.0074 | -0.1886     | -0.1887     |         |
|           | 101->105     | 6.1491            | 201.63           | 0.0098 | 1.3188      | 1.3177      |         |
|           | 98->102      | 6.2181            | 199.39           | 0.0001 | 0.0074      | -0.0049     |         |
|           | 97->103      | 6.2570            | 198.15           | 0.0001 | -0.1781     | -0.3106     |         |
|           | 100->105     | 6.3213            | 196.14           | 0.0132 | 7.8507      | 7.6241      |         |
|           | 97->104      | 6.3644            | 194.81           | 0.0084 | -15.8251    | -16.6947    |         |
|           | 101->108     | 6.4527            | 192.14           | 0.0042 | -1.8728     | -2.0151     |         |
|           | 96->103      | 6.4627            | 191.85           | 0.0034 | 0.2357      | -0.0172     |         |
|           | 101->106     | 6.4881            | 191.10           | 0.0199 | -9.9473     | -9.7277     |         |
|           | 95->102      | 6.5053            | 190.59           | 0.0018 | -0.1440     | -1.0519     |         |
|           | 101->107     | 6.5474            | 189.36           | 0.0291 | -5.2477     | -5.3644     |         |
|           | 94->102      | 6.6201            | 187.29           | 0.0060 | -7.7782     | -8.0202     |         |
|           | 94->102      | 6.6283            | 187.05           | 0.0094 | -7.3993     | -7.5107     |         |
|           | 98->104      | 6.6618            | 186.11           | 0.0002 | 0.0841      | 0.0399      |         |
|           | 101->109     | 6.7346            | 184.10           | 0.0023 | 1.4429      | 0.3699      |         |
|           | 98->105      | 6.7679            | 183.19           | 0.0122 | -3.8395     | -4.7969     |         |
|           | 100->108     | 6.7877            | 182.66           | 0.0005 | -0.9503     | -1.2997     |         |
|           | 101->109     | 6.8088            | 182.10           | 0.0040 | 7.8774      | 8.4367      |         |
|           | <b>1g</b>    | 101->102          | 4.2770           | 289.88 | 0.0005      | 6.9823      | 7.3606  |
|           |              | 100->103          | 4.4156           | 280.79 | 0.0004      | 12.0133     | 11.2022 |
| 99->102   |              | 5.0442            | 245.80           | 0.0007 | -2.8132     | -3.1579     |         |
| 101->104  |              | 5.3681            | 230.97           | 0.0065 | 5.4327      | 5.4486      |         |
| 101->103  |              | 5.4131            | 229.05           | 0.0015 | -1.5773     | -1.6802     |         |
| 101->104  |              | 5.5637            | 222.85           | 0.0007 | -9.9152     | -9.6906     |         |
| 98->103   |              | 5.5984            | 221.46           | 0.0015 | 1.8717      | 1.7219      |         |
| 100->102  |              | 5.6062            | 221.16           | 0.0001 | -0.1021     | 0.0150      |         |
| 99->103   |              | 5.8525            | 211.85           | 0.0001 | 0.1088      | 0.1446      |         |
| 97->102   |              | 5.9026            | 210.05           | 0.0023 | -3.5201     | -3.3648     |         |

---

|          |        |        |        |          |          |
|----------|--------|--------|--------|----------|----------|
| 99->104  | 5.9372 | 208.83 | 0.0071 | -3.1569  | -3.1277  |
| 100->104 | 6.0676 | 204.34 | 0.0005 | 2.5907   | 2.5832   |
| 96->102  | 6.1327 | 202.17 | 0.0079 | -0.0951  | -0.1009  |
| 101->105 | 6.1442 | 201.79 | 0.0098 | 1.1658   | 1.1614   |
| 98->102  | 6.1938 | 200.18 | 0.0000 | 0.0333   | 0.0260   |
| 97->103  | 6.2673 | 197.83 | 0.0001 | -0.0034  | -0.1083  |
| 100->105 | 6.3320 | 195.80 | 0.0134 | 5.5122   | 5.4423   |
| 97->104  | 6.3651 | 194.79 | 0.0079 | -15.0914 | -16.0251 |
| 99->105  | 6.4478 | 192.29 | 0.0032 | 0.1237   | 0.0868   |
| 96->103  | 6.4748 | 191.49 | 0.0021 | -1.5313  | -1.7351  |
| 101->106 | 6.4879 | 191.10 | 0.0174 | -11.4557 | -11.3118 |
| 95->102  | 6.5027 | 190.67 | 0.0021 | -0.4022  | -1.2199  |
| 101->108 | 6.5539 | 189.18 | 0.0345 | -5.4822  | -5.5753  |
| 101->107 | 6.6155 | 187.42 | 0.0054 | -9.7891  | -10.0823 |
| 94->102  | 6.6243 | 187.17 | 0.0094 | -7.2997  | -7.4064  |
| 98->104  | 6.6333 | 186.91 | 0.0001 | 0.2259   | 0.2413   |
| 98->105  | 6.7456 | 183.80 | 0.0065 | 3.9953   | 5.1631   |
| 101->109 | 6.7727 | 183.06 | 0.0062 | -7.1492  | -6.6244  |
| 100->107 | 6.7944 | 182.48 | 0.0009 | 6.4537   | 6.4953   |
| 101->109 | 6.8144 | 181.94 | 0.0062 | 14.5595  | 15.7628  |

---

<sup>a</sup>Excitation energy. <sup>b</sup>Wavelength. <sup>c</sup>Oscillator strength. <sup>d</sup>Rotatory strength in velocity form ( $10^{-40}$  cgs.). <sup>e</sup>Rotatory strength in length form ( $10^{-40}$  cgs.).

**Table S5.** Optimized Z-matrixes of **1** in the gas phase (Å) at B3LYP/6-31G(d,p) level.

| <b>1a</b> |           |           | <b>1b</b> |   |           |           |           |
|-----------|-----------|-----------|-----------|---|-----------|-----------|-----------|
| C         | -3.698847 | 2.164622  | 0.010129  | C | 3.770331  | -1.951908 | -0.207545 |
| C         | -4.116690 | 0.847899  | -0.656341 | C | 4.043380  | -0.546454 | -0.757826 |
| C         | -3.900379 | -0.393993 | 0.251894  | C | 3.734762  | 0.581248  | 0.265034  |
| C         | -2.401560 | -0.314201 | 0.725917  | C | 2.265242  | 0.311901  | 0.759240  |
| C         | -1.592165 | 0.754373  | -0.104865 | C | 1.536959  | -0.747277 | -0.154476 |
| C         | -2.207462 | 2.099870  | 0.318390  | C | 2.287439  | -2.060806 | 0.127839  |
| C         | -1.583221 | -1.620326 | 0.866958  | C | 1.331183  | 1.513546  | 1.042813  |
| O         | -0.383348 | -1.285682 | 1.574954  | O | 0.188069  | 0.999451  | 1.735301  |
| C         | 0.423765  | -0.699281 | 0.567049  | C | -0.588972 | 0.437501  | 0.689035  |
| C         | -0.075073 | 0.717669  | 0.234355  | C | 0.032690  | -0.887868 | 0.212974  |
| O         | -1.590486 | 3.000849  | 0.849501  | O | 1.772636  | -3.063649 | 0.579587  |
| C         | -1.934998 | 0.612584  | -1.615453 | C | 1.823936  | -0.432269 | -1.649980 |
| C         | -4.830362 | -0.344226 | 1.480240  | C | 4.700733  | 0.514797  | 1.464388  |
| C         | -4.249182 | -1.656947 | -0.560834 | C | 3.936507  | 1.939923  | -0.435416 |
| H         | -2.120190 | -2.391144 | 1.421092  | H | 1.808780  | 2.275767  | 1.659781  |
| H         | -5.159088 | 0.886563  | -0.987431 | H | 5.075582  | -0.454191 | -1.109676 |
| O         | -3.345777 | 0.712140  | -1.855018 | O | 3.230981  | -0.378770 | -1.924707 |
| H         | -2.408948 | 0.051990  | 1.760172  | H | 2.337084  | -0.147471 | 1.753215  |
| C         | -0.992141 | -2.176282 | -0.438348 | C | 0.656266  | 2.132204  | -0.191790 |
| O         | 0.218956  | -1.573151 | -0.590664 | O | -0.494720 | 1.432709  | -0.382266 |
| O         | -1.438236 | -2.978969 | -1.214015 | O | 1.005136  | 3.045192  | -0.892236 |
| C         | 1.880845  | -0.754609 | 0.978909  | C | -2.032645 | 0.313547  | 1.129650  |
| C         | 2.801819  | -0.062452 | -0.038214 | C | -2.907290 | -0.363455 | 0.066683  |
| C         | 2.306857  | 1.377898  | -0.325125 | C | -2.292164 | -1.717337 | -0.368326 |
| C         | 0.847177  | 1.387269  | -0.801353 | C | -0.849675 | -1.543168 | -0.866167 |
| C         | 4.239737  | -0.005502 | 0.484599  | C | -4.330009 | -0.566501 | 0.576064  |
| C         | 5.350126  | -0.105156 | -0.543187 | C | -5.427035 | -0.814680 | -0.459590 |
| C         | 6.736233  | 0.146125  | 0.030918  | C | -6.291949 | 0.437944  | -0.600914 |
| O         | 7.661749  | 0.010311  | -1.041958 | O | -5.449180 | 1.476036  | -1.091586 |
| O         | 4.472745  | 0.138856  | 1.672499  | O | -4.608885 | -0.515378 | 1.760456  |
| H         | 2.790253  | -0.622006 | -0.982288 | H | -2.977355 | 0.283090  | -0.818026 |
| H         | 0.031446  | 1.283122  | 1.167939  | H | 0.004893  | -1.546109 | 1.089806  |
| H         | -3.872858 | 2.999319  | -0.678119 | H | 4.007914  | -2.701893 | -0.970207 |
| H         | -4.250338 | 2.392243  | 0.928344  | H | 4.362617  | -2.203506 | 0.678555  |
| H         | -1.580714 | -0.340857 | -2.018682 | H | 1.372536  | 0.518337  | -1.949449 |
| H         | -1.443310 | 1.409105  | -2.185566 | H | 1.390464  | -1.212653 | -2.285480 |
| H         | -4.651383 | 0.533866  | 2.108066  | H | 4.626013  | -0.428466 | 2.014076  |
| H         | -5.882195 | -0.334101 | 1.174339  | H | 5.739128  | 0.635785  | 1.136887  |
| H         | -4.681241 | -1.229839 | 2.107416  | H | 4.485572  | 1.322330  | 2.172661  |
| H         | -3.653316 | -1.753926 | -1.466402 | H | 3.311388  | 2.055549  | -1.318783 |
| H         | -5.303588 | -1.615907 | -0.855756 | H | 4.982074  | 2.031582  | -0.749950 |

|           |           |           |           |           |           |           |           |
|-----------|-----------|-----------|-----------|-----------|-----------|-----------|-----------|
| H         | -4.111699 | -2.565607 | 0.032406  | H         | 3.723668  | 2.774138  | 0.239054  |
| H         | 2.155269  | -1.804972 | 1.114169  | H         | -2.407264 | 1.312397  | 1.368298  |
| H         | 1.982868  | -0.263742 | 1.951322  | H         | -2.057371 | -0.268843 | 2.055872  |
| H         | 2.401855  | 1.970935  | 0.593281  | H         | -2.304262 | -2.407294 | 0.485949  |
| H         | 2.944447  | 1.852961  | -1.079326 | H         | -2.899541 | -2.176953 | -1.155789 |
| H         | 0.519753  | 2.419085  | -0.962834 | H         | -0.430889 | -2.519331 | -1.130526 |
| H         | 0.782234  | 0.865025  | -1.762963 | H         | -0.858781 | -0.929463 | -1.774502 |
| H         | 5.150978  | 0.591176  | -1.368648 | H         | -6.054325 | -1.640304 | -0.108250 |
| H         | 5.311475  | -1.106052 | -0.996162 | H         | -5.010951 | -1.076044 | -1.437278 |
| H         | 6.934250  | -0.572496 | 0.838204  | H         | -6.711236 | 0.688680  | 0.383798  |
| H         | 6.773525  | 1.150233  | 0.478384  | H         | -7.126717 | 0.237625  | -1.289599 |
| H         | 8.548829  | 0.148213  | -0.687173 | H         | -5.939447 | 2.307179  | -1.066967 |
| <b>1c</b> |           |           |           | <b>1d</b> |           |           |           |
| C         | 3.785998  | 1.940188  | 0.204776  | C         | 3.376522  | 2.357678  | -0.196121 |
| C         | 4.050227  | 0.535964  | 0.762467  | C         | 3.929277  | 1.135811  | 0.548843  |
| C         | 3.741748  | -0.595102 | -0.257040 | C         | 3.829780  | -0.178305 | -0.273836 |
| C         | 2.274510  | -0.323537 | -0.757037 | C         | 2.326385  | -0.279198 | -0.728130 |
| C         | 1.547422  | 0.745786  | 0.146288  | C         | 1.421484  | 0.757338  | 0.043078  |
| C         | 2.307245  | 2.051583  | -0.148387 | C         | 1.897167  | 2.123805  | -0.481028 |
| C         | 1.337839  | -1.523936 | -1.035285 | C         | 1.641470  | -1.666542 | -0.771233 |
| O         | 0.197020  | -1.009956 | -1.734327 | O         | 0.407276  | -1.500022 | -1.479066 |
| C         | -0.576435 | -0.436928 | -0.691258 | C         | -0.445210 | -0.931439 | -0.498284 |
| C         | 0.044738  | 0.891390  | -0.226126 | C         | -0.088009 | 0.547816  | -0.266404 |
| O         | 1.803559  | 3.047951  | -0.625434 | O         | 1.192248  | 2.918774  | -1.068897 |
| C         | 1.826439  | 0.442722  | 1.645427  | C         | 1.790199  | 0.753026  | 1.553735  |
| C         | 4.711728  | -0.536581 | -1.453501 | C         | 4.740379  | -0.117445 | -1.516098 |
| C         | 3.936371  | -1.951405 | 0.449948  | C         | 4.308997  | -1.344214 | 0.613696  |
| H         | 1.813686  | -2.291684 | -1.646631 | H         | 2.247874  | -2.414675 | -1.283381 |
| H         | 5.080485  | 0.440759  | 1.119247  | H         | 4.965669  | 1.299604  | 0.860017  |
| O         | 3.231902  | 0.375264  | 1.925677  | O         | 3.186689  | 1.003726  | 1.765285  |
| H         | 2.350900  | 0.128167  | -1.754198 | H         | 2.286579  | 0.015307  | -1.784527 |
| C         | 0.655996  | -2.133191 | 0.199897  | C         | 1.122509  | -2.191197 | 0.576955  |
| O         | -0.493779 | -1.426150 | 0.382693  | O         | -0.140198 | -1.702716 | 0.710869  |
| O         | 0.995264  | -3.045125 | 0.905353  | O         | 1.654953  | -2.893718 | 1.394737  |
| C         | -2.021070 | -0.312343 | -1.138538 | C         | -1.894031 | -1.160001 | -0.877769 |
| C         | -2.895541 | 0.378335  | -0.065150 | C         | -2.857492 | -0.503881 | 0.119727  |
| C         | -2.284303 | 1.724787  | 0.343973  | C         | -2.519811 | 0.999614  | 0.295571  |
| C         | -0.841234 | 1.561196  | 0.842231  | C         | -1.062615 | 1.191402  | 0.738446  |
| C         | -4.324918 | 0.520522  | -0.580322 | C         | -4.308543 | -0.645089 | -0.325623 |
| C         | -5.184214 | -0.743328 | -0.655530 | C         | -5.394954 | -0.508958 | 0.743706  |
| C         | -6.298105 | -0.670829 | 0.387460  | C         | -6.480965 | 0.470585  | 0.318888  |
| O         | -5.671279 | -0.647902 | 1.666752  | O         | -5.897109 | 1.771344  | 0.335312  |
| O         | -4.792541 | 1.596453  | -0.904736 | O         | -4.608624 | -0.846593 | -1.488279 |



|           |           |           |           |           |           |           |           |
|-----------|-----------|-----------|-----------|-----------|-----------|-----------|-----------|
| H         | -2.944210 | -0.288218 | 0.807131  | H         | -2.754049 | -0.989832 | 1.100078  |
| H         | 0.022728  | 1.540195  | -1.110248 | H         | -0.260176 | 1.036313  | -1.233229 |
| H         | 4.016169  | 2.691054  | 0.968950  | H         | 3.469713  | 3.248698  | 0.434979  |
| H         | 4.389282  | 2.188905  | -0.674588 | H         | 3.896858  | 2.579499  | -1.133749 |
| H         | 1.363624  | -0.499628 | 1.953528  | H         | 1.532420  | -0.200864 | 2.023417  |
| H         | 1.398829  | 1.234141  | 2.270955  | H         | 1.228068  | 1.535072  | 2.076635  |
| H         | 4.497024  | -1.346714 | -2.159007 | H         | 4.675025  | -1.052369 | -2.083282 |
| H         | 5.748689  | -0.658734 | -1.121993 | H         | 5.788404  | 0.015898  | -1.226045 |
| H         | 4.641291  | 0.404557  | -2.007363 | H         | 4.471107  | 0.696333  | -2.196314 |
| H         | 3.308420  | -2.060328 | 1.332244  | H         | 3.734422  | -1.436146 | 1.533499  |
| H         | 4.980559  | -2.045581 | 0.768194  | H         | 5.357471  | -1.182301 | 0.887344  |
| H         | 3.722974  | -2.788055 | -0.221456 | H         | 4.253203  | -2.299915 | 0.084608  |
| H         | -2.382869 | -1.315118 | -1.383971 | H         | -2.063746 | -2.238175 | -0.947789 |
| H         | -2.025397 | 0.278934  | -2.061716 | H         | -2.058353 | -0.742540 | -1.875722 |
| H         | -2.315603 | 2.408387  | -0.512323 | H         | -2.686886 | 1.509056  | -0.661929 |
| H         | -2.901818 | 2.182679  | 1.122974  | H         | -3.202290 | 1.463994  | 1.013370  |
| H         | -0.421483 | 2.540661  | 1.091949  | H         | -0.840736 | 2.260220  | 0.820444  |
| H         | -0.844208 | 0.961666  | 1.760352  | H         | -0.930224 | 0.750078  | 1.733378  |
| H         | -4.592309 | -1.648344 | -0.489022 | H         | -4.974744 | -0.202473 | 1.706479  |
| H         | -5.635348 | -0.795542 | -1.652263 | H         | -5.837846 | -1.504384 | 0.878927  |
| H         | -6.965107 | -1.539790 | 0.281817  | H         | -7.334208 | 0.408552  | 1.011139  |
| H         | -6.886566 | 0.240142  | 0.209424  | H         | -6.827302 | 0.195779  | -0.686084 |
| H         | -6.347548 | -0.478544 | 2.334421  | H         | -6.493365 | 2.378064  | -0.120657 |
| <b>1e</b> |           |           |           | <b>1f</b> |           |           |           |
| C         | -3.806591 | 1.804672  | 0.546625  | C         | 3.622885  | 2.211019  | -0.067281 |
| C         | -4.125736 | 0.527825  | -0.241261 | C         | 4.096972  | 0.889600  | 0.551201  |
| C         | -3.613295 | -0.763091 | 0.455258  | C         | 3.861429  | -0.336889 | -0.373025 |
| C         | -2.089257 | -0.505786 | 0.751800  | C         | 2.341300  | -0.275261 | -0.776202 |
| C         | -1.560229 | 0.766208  | -0.016702 | C         | 1.551629  | 0.755790  | 0.118636  |
| C         | -2.292228 | 1.937145  | 0.663074  | C         | 2.119034  | 2.124072  | -0.299720 |
| C         | -1.084604 | -1.675076 | 0.617071  | C         | 1.542902  | -1.593805 | -0.913868 |
| O         | 0.143471  | -1.239689 | 1.213413  | O         | 0.303329  | -1.266157 | -1.554521 |
| C         | 0.711618  | -0.424272 | 0.201504  | C         | -0.464474 | -0.722944 | -0.493881 |
| C         | -0.019642 | 0.927704  | 0.123415  | C         | 0.020611  | 0.695891  | -0.148782 |
| O         | -1.740462 | 2.850046  | 1.242952  | O         | 1.457871  | 3.025039  | -0.774564 |
| C         | -2.089007 | 0.753426  | -1.478842 | C         | 1.969735  | 0.584106  | 1.607002  |
| C         | -4.361559 | -1.007161 | 1.780548  | C         | 4.733061  | -0.243344 | -1.641258 |
| C         | -3.891673 | -1.960461 | -0.475339 | C         | 4.271557  | -1.609873 | 0.393794  |
| H         | -1.425973 | -2.578408 | 1.124261  | H         | 2.067306  | -2.338275 | -1.514045 |
| H         | -5.199549 | 0.441840  | -0.434702 | H         | 5.153060  | 0.942332  | 0.833120  |
| O         | -3.519185 | 0.655668  | -1.530787 | O         | 3.386922  | 0.714753  | 1.781720  |
| H         | -2.003142 | -0.268343 | 1.819655  | H         | 2.294212  | 0.116948  | -1.799809 |
| C         | -0.608858 | -1.981155 | -0.811860 | C         | 1.026493  | -2.196145 | 0.402339  |

|           |           |           |           |           |           |           |           |
|-----------|-----------|-----------|-----------|-----------|-----------|-----------|-----------|
| O         | 0.473818  | -1.184543 | -1.027653 | O         | -0.187301 | -1.621014 | 0.629154  |
| O         | -1.042059 | -2.750773 | -1.627480 | O         | 1.523311  | -3.010404 | 1.133458  |
| C         | 2.206313  | -0.296698 | 0.423598  | C         | -1.939125 | -0.800130 | -0.835021 |
| C         | 2.853900  | 0.631817  | -0.633283 | C         | -2.817763 | -0.162061 | 0.253542  |
| C         | 2.149775  | 1.995030  | -0.655901 | C         | -2.344922 | 1.284887  | 0.548878  |
| C         | 0.644852  | 1.845705  | -0.921041 | C         | -0.862799 | 1.319035  | 0.948024  |
| C         | 4.348851  | 0.746152  | -0.348627 | C         | -4.283189 | -0.131377 | -0.178663 |
| C         | 5.236413  | -0.450719 | -0.702499 | C         | -5.340644 | -0.328994 | 0.893652  |
| C         | 6.087983  | -0.879651 | 0.485585  | C         | -6.769600 | -0.313369 | 0.341056  |
| O         | 5.199267  | -1.421999 | 1.459894  | O         | -7.089681 | 0.911262  | -0.290536 |
| O         | 4.835483  | 1.745950  | 0.146159  | O         | -4.584307 | 0.085890  | -1.343948 |
| H         | 2.739635  | 0.141274  | -1.611089 | H         | -2.731412 | -0.745320 | 1.178559  |
| H         | 0.139290  | 1.392932  | 1.103966  | H         | -0.141941 | 1.282735  | -1.060931 |
| H         | -4.189333 | 2.678489  | 0.007480  | H         | 3.817892  | 3.036709  | 0.626054  |
| H         | -4.251782 | 1.830156  | 1.546651  | H         | 4.122034  | 2.463755  | -1.008540 |
| H         | -1.662241 | -0.076731 | -2.049475 | H         | 1.658493  | -0.388605 | 2.000113  |
| H         | -1.799098 | 1.679807  | -1.987068 | H         | 1.486457  | 1.352351  | 2.221280  |
| H         | -4.006762 | -1.929153 | 2.253983  | H         | 5.797290  | -0.218115 | -1.382825 |
| H         | -4.220647 | -0.195928 | 2.501339  | H         | 4.509541  | 0.643010  | -2.242795 |
| H         | -5.436883 | -1.122992 | 1.606075  | H         | 4.572968  | -1.119190 | -2.279411 |
| H         | -4.972262 | -2.051047 | -0.632596 | H         | 3.723540  | -1.737811 | 1.325520  |
| H         | -3.546366 | -2.899475 | -0.033214 | H         | 5.338235  | -1.554885 | 0.637752  |
| H         | -3.421025 | -1.855990 | -1.451257 | H         | 4.121708  | -2.508290 | -0.211805 |
| H         | 2.647722  | -1.296009 | 0.423651  | H         | -2.196262 | -1.852199 | -0.989712 |
| H         | 2.359423  | 0.121431  | 1.424378  | H         | -2.101816 | -0.280290 | -1.783751 |
| H         | 2.320124  | 2.499285  | 0.302036  | H         | -2.503876 | 1.895862  | -0.348474 |
| H         | 2.603814  | 2.633247  | -1.421162 | H         | -2.953148 | 1.725425  | 1.346760  |
| H         | 0.163734  | 2.828377  | -0.891817 | H         | -0.552376 | 2.354893  | 1.116566  |
| H         | 0.496788  | 1.438631  | -1.928470 | H         | -0.734767 | 0.777409  | 1.892307  |
| H         | 5.895191  | -0.132737 | -1.520654 | H         | -5.214346 | 0.465191  | 1.643160  |
| H         | 4.646090  | -1.298766 | -1.062768 | H         | -5.131246 | -1.272271 | 1.417929  |
| H         | 6.620621  | -0.000027 | 0.870732  | H         | -7.479052 | -0.441818 | 1.164554  |
| H         | 6.830903  | -1.625390 | 0.165089  | H         | -6.900977 | -1.167209 | -0.341389 |
| H         | 5.686916  | -1.541433 | 2.284253  | H         | -6.513215 | 0.951464  | -1.068829 |
| <b>1g</b> |           |           |           | <b>1h</b> |           |           |           |
| C         | 3.687245  | 2.143230  | -0.166117 | C         | -3.697494 | 2.166956  | 0.009495  |
| C         | 4.126586  | 0.835559  | 0.504571  | C         | -4.115344 | 0.851519  | -0.659553 |
| C         | 3.855509  | -0.421208 | -0.368372 | C         | -3.901661 | -0.391953 | 0.247070  |
| C         | 2.334926  | -0.338374 | -0.766414 | C         | -2.403738 | -0.313808 | 0.724307  |
| C         | 1.577664  | 0.755028  | 0.080943  | C         | -1.591868 | 0.754902  | -0.103844 |
| C         | 2.182142  | 2.086477  | -0.398532 | C         | -2.206742 | 2.100594  | 0.319864  |
| C         | 1.500369  | -1.640370 | -0.835256 | C         | -1.587004 | -1.620750 | 0.865721  |
| O         | 0.267291  | -1.311613 | -1.487551 | O         | -0.387978 | -1.287742 | 1.576467  |

|   |           |           |           |   |           |           |           |
|---|-----------|-----------|-----------|---|-----------|-----------|-----------|
| C | -0.480896 | -0.694792 | -0.453448 | C | 0.421322  | -0.701041 | 0.570872  |
| C | 0.045387  | 0.725792  | -0.182779 | C | -0.075459 | 0.716606  | 0.238168  |
| O | 1.545949  | 2.982571  | -0.915161 | O | -1.589195 | 3.000731  | 0.851655  |
| C | 1.993672  | 0.641053  | 1.575707  | C | -1.932195 | 0.614703  | -1.615071 |
| C | 4.721837  | -0.402356 | -1.643220 | C | -4.834176 | -0.343728 | 1.473552  |
| C | 4.236419  | -1.671449 | 0.449536  | C | -4.249404 | -1.653345 | -0.568517 |
| H | 2.001432  | -2.428173 | -1.398881 | H | -2.125645 | -2.391512 | 1.418323  |
| H | 5.184399  | 0.870815  | 0.782711  | H | -5.157109 | 0.891618  | -0.992491 |
| O | 3.415082  | 0.728452  | 1.742192  | O | -3.342371 | 0.717047  | -1.857139 |
| H | 2.291270  | 0.004884  | -1.807626 | H | -2.412962 | 0.051354  | 1.758937  |
| C | 0.973799  | -2.160767 | 0.511747  | C | -0.993440 | -2.176586 | -0.438422 |
| O | -0.222991 | -1.541502 | 0.712825  | O | 0.218552  | -1.574071 | -0.588057 |
| O | 1.452069  | -2.949038 | 1.282485  | O | -1.437772 | -2.979194 | -1.215136 |
| C | -1.958371 | -0.748048 | -0.786748 | C | 1.877731  | -0.757980 | 0.985039  |
| C | -2.814776 | -0.027569 | 0.265728  | C | 2.799994  | -0.068030 | -0.032410 |
| C | -2.300622 | 1.419133  | 0.484430  | C | 2.308591  | 1.373817  | -0.318000 |
| C | -0.817081 | 1.431502  | 0.879999  | C | 0.849249  | 1.386294  | -0.795380 |
| C | -4.282008 | 0.019306  | -0.152984 | C | 4.238892  | -0.016179 | 0.487807  |
| C | -5.327748 | 0.013111  | 0.948736  | C | 5.351454  | -0.112470 | -0.541790 |
| C | -6.715452 | 0.456822  | 0.469884  | C | 6.744773  | 0.161148  | 0.027676  |
| O | -7.250445 | -0.410899 | -0.508866 | O | 7.746495  | 0.142394  | -0.981871 |
| O | -4.595747 | 0.075450  | -1.334100 | O | 4.475276  | 0.122343  | 1.675344  |
| H | -2.743471 | -0.561021 | 1.222513  | H | 2.785066  | -0.626906 | -0.977027 |
| H | -0.101500 | 1.268250  | -1.124612 | H | 0.029816  | 1.281301  | 1.172388  |
| H | 3.902560  | 2.989796  | 0.495392  | H | -3.869969 | 3.002788  | -0.677781 |
| H | 4.193718  | 2.347129  | -1.115251 | H | -4.250226 | 2.393652  | 0.927219  |
| H | 1.649316  | -0.299328 | 2.016408  | H | -1.578878 | -0.339217 | -2.018201 |
| H | 1.539164  | 1.455416  | 2.151739  | H | -1.438276 | 1.410673  | -2.184018 |
| H | 5.787903  | -0.391879 | -1.391395 | H | -4.687077 | -1.230615 | 2.099422  |
| H | 4.536935  | -1.300321 | -2.242780 | H | -5.885350 | -0.332235 | 1.165438  |
| H | 4.515430  | 0.463008  | -2.280230 | H | -4.655820 | 0.533105  | 2.103309  |
| H | 3.690683  | -1.743370 | 1.388478  | H | -4.112939 | -2.563180 | 0.023158  |
| H | 5.305830  | -1.635653 | 0.685020  | H | -3.652278 | -1.748588 | -1.473486 |
| H | 4.058023  | -2.590529 | -0.116043 | H | -5.303355 | -1.611584 | -0.864961 |
| H | -2.247510 | -1.798555 | -0.883397 | H | 2.150488  | -1.808634 | 1.121740  |
| H | -2.108246 | -0.278447 | -1.763391 | H | 1.979462  | -0.266310 | 1.957062  |
| H | -2.442142 | 1.987081  | -0.443830 | H | 2.404233  | 1.965377  | 0.601261  |
| H | -2.893196 | 1.919925  | 1.258299  | H | 2.947597  | 1.848955  | -1.070985 |
| H | -0.476574 | 2.465434  | 0.992422  | H | 0.523743  | 2.418908  | -0.955505 |
| H | -0.703069 | 0.938047  | 1.852098  | H | 0.784336  | 0.865767  | -1.757971 |
| H | -4.979287 | 0.628027  | 1.789137  | H | 5.144477  | 0.575115  | -1.372448 |
| H | -5.382565 | -1.017316 | 1.329946  | H | 5.303872  | -1.120418 | -0.983454 |
| H | -6.655558 | 1.494896  | 0.104952  | H | 6.963928  | -0.545784 | 0.838708  |

|           |           |           |           |   |          |           |           |
|-----------|-----------|-----------|-----------|---|----------|-----------|-----------|
| H         | -7.410098 | 0.449968  | 1.315845  | H | 6.772671 | 1.161924  | 0.466695  |
| H         | -6.634702 | -0.357940 | -1.256593 | H | 7.855257 | -0.771648 | -1.274942 |
| <b>ii</b> |           |           |           |   |          |           |           |
| C         | -3.698707 | 2.165445  | 0.016677  |   |          |           |           |
| C         | -4.116767 | 0.851369  | -0.654853 |   |          |           |           |
| C         | -3.901348 | -0.393946 | 0.248853  |   |          |           |           |
| C         | -2.403047 | -0.315771 | 0.724762  |   |          |           |           |
| C         | -1.592585 | 0.754501  | -0.102704 |   |          |           |           |
| C         | -2.206950 | 2.099847  | 0.322559  |   |          |           |           |
| C         | -1.585275 | -1.622544 | 0.863175  |   |          |           |           |
| O         | -0.385874 | -1.289970 | 1.573079  |   |          |           |           |
| C         | 0.422285  | -0.701610 | 0.567503  |   |          |           |           |
| C         | -0.075746 | 0.716321  | 0.237547  |   |          |           |           |
| O         | -1.588385 | 3.000317  | 0.852716  |   |          |           |           |
| C         | -1.934894 | 0.616016  | -1.613720 |   |          |           |           |
| C         | -4.832747 | -0.349025 | 1.476259  |   |          |           |           |
| C         | -4.249110 | -1.653780 | -0.569166 |   |          |           |           |
| H         | -2.122890 | -2.394613 | 1.414908  |   |          |           |           |
| H         | -5.158932 | 0.891565  | -0.986421 |   |          |           |           |
| O         | -3.345143 | 0.720321  | -1.853751 |   |          |           |           |
| H         | -2.411430 | 0.047801  | 1.759927  |   |          |           |           |
| C         | -0.993157 | -2.175395 | -0.443003 |   |          |           |           |
| O         | 0.218545  | -1.572218 | -0.592595 |   |          |           |           |
| O         | -1.438544 | -2.975692 | -1.221403 |   |          |           |           |
| C         | 1.879061  | -0.758278 | 0.980599  |   |          |           |           |
| C         | 2.800593  | -0.065399 | -0.035529 |   |          |           |           |
| C         | 2.306798  | 1.375883  | -0.319537 |   |          |           |           |
| C         | 0.847258  | 1.387633  | -0.796282 |   |          |           |           |
| C         | 4.238979  | -0.010895 | 0.486525  |   |          |           |           |
| C         | 5.353388  | -0.114376 | -0.540427 |   |          |           |           |
| C         | 6.744708  | 0.169057  | 0.028469  |   |          |           |           |
| O         | 7.770126  | -0.053012 | -0.931215 |   |          |           |           |
| O         | 4.473370  | 0.131522  | 1.673840  |   |          |           |           |
| H         | 2.787964  | -0.623643 | -0.980468 |   |          |           |           |
| H         | 0.030415  | 1.279912  | 1.172284  |   |          |           |           |
| H         | -3.873996 | 3.003233  | -0.667428 |   |          |           |           |
| H         | -4.248913 | 2.388674  | 0.936763  |   |          |           |           |
| H         | -1.582976 | -0.337901 | -2.018058 |   |          |           |           |
| H         | -1.440892 | 1.412000  | -2.182573 |   |          |           |           |
| H         | -4.654451 | 0.526511  | 2.107813  |   |          |           |           |
| H         | -5.884188 | -0.337600 | 1.169119  |   |          |           |           |
| H         | -4.684475 | -1.237185 | 2.099996  |   |          |           |           |
| H         | -3.652865 | -1.746849 | -1.474908 |   |          |           |           |

|   |           |           |           |
|---|-----------|-----------|-----------|
| H | -5.303382 | -1.612027 | -0.864435 |
| H | -4.111450 | -2.564788 | 0.020376  |
| H | 2.153126  | -1.808864 | 1.114547  |
| H | 1.980841  | -0.268789 | 1.953716  |
| H | 2.402187  | 1.966834  | 0.600132  |
| H | 2.944664  | 1.852804  | -1.072698 |
| H | 0.520637  | 2.420077  | -0.955302 |
| H | 0.782177  | 0.867635  | -1.759109 |
| H | 5.124967  | 0.556797  | -1.381743 |
| H | 5.330760  | -1.127648 | -0.966356 |
| H | 6.945978  | -0.512694 | 0.857659  |
| H | 6.782508  | 1.187633  | 0.440253  |
| H | 7.695423  | 0.630643  | -1.609601 |

**Figure S25.** Optimized geometries of conformers of 6,8-*epi*-1 at the B3LYP/6-31G(d,p) level in the gas phase.

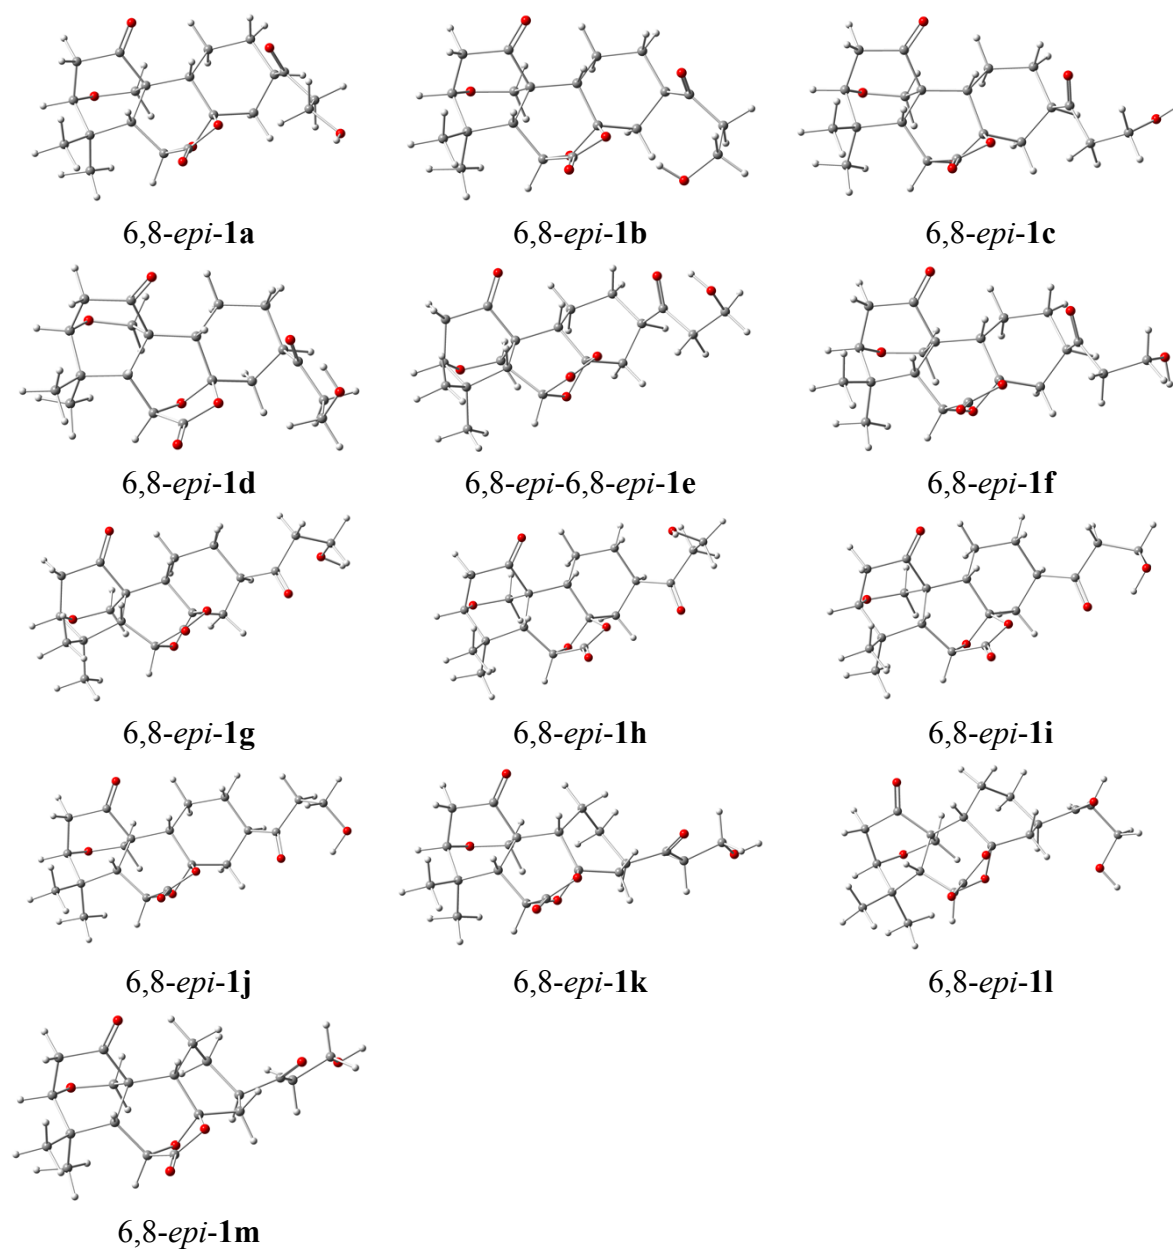

**Table S6.** Important thermodynamic parameters (a.u.) of the optimized 6,8-*epi*-1 at B3LYP/6-31G(d,p) level in the gas phase.

| Species             | $E$          | $E'=E+ZPE$   | $H$          | $G$          |
|---------------------|--------------|--------------|--------------|--------------|
| 6,8- <i>epi</i> -1a | -1303.890679 | -1303.914676 | -1303.889735 | -1303.967908 |
| 6,8- <i>epi</i> -1b | -1303.895613 | -1303.919105 | -1303.894668 | -1303.970560 |
| 6,8- <i>epi</i> -1c | -1303.891566 | -1303.915419 | -1303.890622 | -1303.968586 |
| 6,8- <i>epi</i> -1d | -1303.895765 | -1303.919276 | -1303.894821 | -1303.971763 |
| 6,8- <i>epi</i> -1e | -1303.895484 | -1303.918890 | -1303.894540 | -1303.970991 |
| 6,8- <i>epi</i> -1f | -1303.890234 | -1303.914057 | -1303.889290 | -1303.967302 |
| 6,8- <i>epi</i> -1g | -1303.888487 | -1303.912445 | -1303.887543 | -1303.966037 |
| 6,8- <i>epi</i> -1h | -1303.889093 | -1303.913005 | -1303.888148 | -1303.965767 |
| 6,8- <i>epi</i> -1i | -1303.893229 | -1303.916826 | -1303.892285 | -1303.969612 |
| 6,8- <i>epi</i> -1j | -1303.892961 | -1303.916628 | -1303.892016 | -1303.969891 |
| 6,8- <i>epi</i> -1k | -1303.888356 | -1303.912505 | -1303.887412 | -1303.967005 |
| 6,8- <i>epi</i> -1l | -1303.888029 | -1303.911991 | -1303.887084 | -1303.965601 |
| 6,8- <i>epi</i> -1m | -1303.888356 | -1303.912505 | -1303.887412 | -1303.966993 |

$E$ ,  $E'$ ,  $H$ ,  $G$ : total energy, total energy with zero point energy (ZPE), enthalpy, and Gibbs free energy.

**Table S7.** Conformational analysis of 1.

| Species             | $\Delta E^a$ | $P_E\%^b$ | $\Delta E'^c$ | $P_E\%^d$ | $\Delta G^e$ | $P_G\%^f$ |
|---------------------|--------------|-----------|---------------|-----------|--------------|-----------|
| 6,8- <i>epi</i> -1a | 3.19         | 0.2       | 2.89          | 0.3       | 2.42         | 0.8       |
| 6,8- <i>epi</i> -1b | 0.10         | 31.1      | 0.11          | 31.3      | 0.75         | 13.7      |
| 6,8- <i>epi</i> -1c | 2.63         | 0.4       | 2.42          | 0.6       | 1.99         | 1.7       |
| 6,8- <i>epi</i> -1d | 0.00         | 36.6      | 0.00          | 37.5      | 0.00         | 49.0      |
| 6,8- <i>epi</i> -1e | 0.18         | 27.2      | 0.24          | 24.9      | 0.48         | 21.6      |
| 6,8- <i>epi</i> -1f | 3.47         | 0.1       | 3.27          | 0.1       | 2.80         | 0.4       |
| 6,8- <i>epi</i> -1g | 4.57         | 0.0       | 4.29          | 0.0       | 3.59         | 0.1       |
| 6,8- <i>epi</i> -1h | 4.19         | 0.0       | 3.94          | 0.0       | 3.76         | 0.1       |
| 6,8- <i>epi</i> -1i | 1.59         | 2.5       | 1.54          | 2.8       | 1.35         | 5.0       |
| 6,8- <i>epi</i> -1j | 1.76         | 1.9       | 1.66          | 2.5       | 1.17         | 6.9       |
| 6,8- <i>epi</i> -1k | 4.65         | 0.0       | 4.25          | 0.0       | 2.99         | 0.3       |
| 6,8- <i>epi</i> -1l | 4.85         | 0.0       | 4.57          | 0.0       | 3.87         | 0.1       |
| 6,8- <i>epi</i> -1m | 4.65         | 0.0       | 4.25          | 0.0       | 2.99         | 0.3       |

<sup>a</sup>Relative energy, <sup>c</sup>relative energy with ZPE, and <sup>e</sup>relative Gibbs free energy in kcal/mol.

<sup>b,d,f</sup>Conformational distribution calculated by using the respective parameters above at B3LYP/6-31G(d,p) level in the gas phase. T=298 K.

**Table S8.** Optimized Z-matrixes of 6,8-*epi*-1 in the gas phase (Å) at B3LYP/6-31G(d,p) level.

| 6,8- <i>epi</i> -1a |           |           |           | 6,8- <i>epi</i> -1b |           |           |           |
|---------------------|-----------|-----------|-----------|---------------------|-----------|-----------|-----------|
| C                   | 3.651345  | -0.913648 | 1.494078  | C                   | 3.713585  | -1.178114 | 1.173281  |
| C                   | 4.064191  | -0.205339 | 0.196018  | C                   | 4.024320  | -0.357405 | -0.086412 |
| C                   | 3.333416  | 1.145421  | -0.026545 | C                   | 3.335789  | 1.034231  | -0.097275 |
| C                   | 1.803842  | 0.837113  | 0.189671  | C                   | 1.826305  | 0.755910  | 0.257246  |
| C                   | 1.530962  | -0.716946 | 0.122481  | C                   | 1.477780  | -0.770014 | 0.057549  |
| C                   | 2.167801  | -1.263174 | 1.407891  | C                   | 2.215317  | -1.468060 | 1.208656  |
| O                   | 1.572898  | -1.888462 | 2.261109  | O                   | 1.681457  | -2.154863 | 2.055063  |
| C                   | 2.360944  | -1.328674 | -1.042779 | C                   | 2.155006  | -1.284696 | -1.244323 |
| C                   | 3.800923  | 2.203687  | 0.989930  | C                   | 3.956390  | 1.966701  | 0.959562  |
| C                   | 3.678954  | 1.652528  | -1.442546 | C                   | 3.549288  | 1.669852  | -1.487012 |
| H                   | 5.147252  | -0.051886 | 0.158624  | H                   | 5.103787  | -0.238843 | -0.222672 |
| O                   | 3.767001  | -1.093302 | -0.886591 | O                   | 3.579074  | -1.120478 | -1.212576 |
| H                   | 1.569605  | 1.154859  | 1.213585  | H                   | 1.719797  | 0.967095  | 1.328932  |
| C                   | -0.732249 | -0.018030 | -0.850998 | C                   | -0.843660 | 0.095104  | -0.606373 |
| C                   | 0.014002  | -1.046107 | 0.046794  | C                   | -0.051907 | -1.035729 | 0.110976  |
| C                   | -1.843388 | -0.611699 | -1.696352 | C                   | -2.029679 | -0.366547 | -1.436811 |
| C                   | -2.699306 | -1.619109 | -0.891778 | C                   | -2.869999 | -1.490700 | -0.769853 |
| C                   | -1.820928 | -2.771866 | -0.335229 | C                   | -1.988372 | -2.625636 | -0.186034 |
| C                   | -0.309927 | -2.481952 | -0.411742 | C                   | -0.486787 | -2.414319 | -0.419914 |
| C                   | -3.500845 | -0.911337 | 0.222366  | C                   | -3.811026 | -0.877575 | 0.281210  |
| C                   | -4.610895 | 0.034498  | -0.209225 | C                   | -5.016161 | -0.088275 | -0.225648 |
| H                   | -0.389408 | -0.944494 | 1.059683  | H                   | -0.342016 | -1.010235 | 1.166835  |
| O                   | -3.289235 | -1.130758 | 1.400714  | O                   | -3.615232 | -0.997811 | 1.476262  |
| C                   | -4.886385 | 1.127856  | 0.816135  | C                   | -5.059962 | 1.337752  | 0.346772  |
| O                   | -5.988483 | 1.887655  | 0.328141  | O                   | -4.017431 | 2.152709  | -0.164421 |
| C                   | 0.797872  | 1.584288  | -0.735024 | C                   | 0.760312  | 1.629231  | -0.464299 |
| C                   | -0.406322 | 2.030092  | 0.095924  | C                   | -0.335708 | 2.014623  | 0.528198  |
| O                   | -1.316703 | 1.027189  | -0.002790 | O                   | -1.305314 | 1.063487  | 0.404171  |
| O                   | 0.180907  | 0.693666  | -1.672136 | O                   | 0.019110  | 0.870850  | -1.425347 |
| O                   | -0.557867 | 3.027677  | 0.748752  | O                   | -0.384162 | 2.932604  | 1.300304  |
| H                   | 4.219426  | -1.842826 | 1.609331  | H                   | 4.249595  | -2.132556 | 1.139617  |
| H                   | 3.831081  | -0.318360 | 2.395974  | H                   | 4.008358  | -0.681702 | 2.104416  |
| H                   | 2.219768  | -2.413362 | -1.078518 | H                   | 1.958302  | -2.353435 | -1.374891 |
| H                   | 2.022132  | -0.910049 | -1.996025 | H                   | 1.742973  | -0.754899 | -2.109340 |
| H                   | 4.864384  | 2.430936  | 0.857548  | H                   | 5.008831  | 2.169418  | 0.733022  |
| H                   | 3.650178  | 1.883853  | 2.025451  | H                   | 3.902490  | 1.548322  | 1.969352  |
| H                   | 3.242889  | 3.136586  | 0.854810  | H                   | 3.430678  | 2.927492  | 0.978951  |
| H                   | 3.330480  | 2.678943  | -1.594070 | H                   | 3.232593  | 2.717379  | -1.498053 |
| H                   | 4.765873  | 1.662494  | -1.573672 | H                   | 4.615093  | 1.656484  | -1.736639 |
| H                   | 3.261224  | 1.024799  | -2.231638 | H                   | 3.021661  | 1.140602  | -2.282280 |



|                   |           |           |           |                   |           |           |           |
|-------------------|-----------|-----------|-----------|-------------------|-----------|-----------|-----------|
| H                 | -1.379055 | -1.128170 | -2.542282 | H                 | -1.618837 | -0.739125 | -2.380187 |
| H                 | -2.435056 | 0.209146  | -2.107738 | H                 | -2.638244 | 0.511804  | -1.670244 |
| H                 | -3.450968 | -2.015106 | -1.587712 | H                 | -3.518399 | -1.884379 | -1.562264 |
| H                 | -2.100457 | -2.935946 | 0.708494  | H                 | -2.172073 | -2.675286 | 0.891621  |
| H                 | -2.034096 | -3.696460 | -0.881054 | H                 | -2.294149 | -3.586954 | -0.610670 |
| H                 | 0.045912  | -2.641695 | -1.436633 | H                 | -0.253613 | -2.511877 | -1.487284 |
| H                 | 0.227381  | -3.190532 | 0.224718  | H                 | 0.077148  | -3.191151 | 0.103956  |
| H                 | -5.520405 | -0.570033 | -0.340473 | H                 | -5.909039 | -0.634319 | 0.107623  |
| H                 | -4.403699 | 0.482498  | -1.185670 | H                 | -5.040012 | -0.045832 | -1.318957 |
| H                 | -3.985389 | 1.746528  | 0.935158  | H                 | -5.035020 | 1.282561  | 1.442711  |
| H                 | -5.103073 | 0.666686  | 1.788287  | H                 | -6.001378 | 1.812342  | 0.052428  |
| H                 | -6.145009 | 2.608762  | 0.950485  | H                 | -3.205479 | 1.947210  | 0.322359  |
| H                 | 1.236838  | 2.417903  | -1.278669 | H                 | 1.171932  | 2.509886  | -0.952964 |
| <b>6,8-epi-1c</b> |           |           |           | <b>6,8-epi-1d</b> |           |           |           |
| C                 | 3.639842  | -1.379391 | 1.311001  | C                 | 3.479273  | -1.017611 | 1.650347  |
| C                 | 4.106688  | -0.604147 | 0.070882  | C                 | 4.010538  | -0.384833 | 0.356176  |
| C                 | 3.562162  | 0.847799  | 0.013402  | C                 | 3.381987  | 0.999779  | 0.045578  |
| C                 | 2.012490  | 0.724354  | 0.268060  | C                 | 1.826481  | 0.793869  | 0.187718  |
| C                 | 1.527352  | -0.763767 | 0.058190  | C                 | 1.459155  | -0.741098 | 0.148880  |
| C                 | 2.120552  | -1.518489 | 1.256080  | C                 | 1.985895  | -1.285433 | 1.483965  |
| O                 | 1.471165  | -2.140750 | 2.070960  | O                 | 1.305727  | -1.852197 | 2.314008  |
| C                 | 2.229505  | -1.357212 | -1.195931 | C                 | 2.312796  | -1.441368 | -0.947169 |
| C                 | 4.200941  | 1.724511  | 1.106643  | C                 | 3.860532  | 2.065851  | 1.048570  |
| C                 | 3.929521  | 1.446957  | -1.360404 | C                 | 3.834246  | 1.430247  | -1.365593 |
| H                 | 5.198975  | -0.593967 | 0.001654  | H                 | 5.101631  | -0.301245 | 0.378455  |
| O                 | 3.658549  | -1.327638 | -1.079782 | O                 | 3.719336  | -1.291706 | -0.712697 |
| H                 | 1.857577  | 0.960193  | 1.328436  | H                 | 1.560444  | 1.156671  | 1.188740  |
| C                 | -0.647351 | 0.325109  | -0.748407 | C                 | -0.700431 | 0.067008  | -0.966366 |
| C                 | -0.021599 | -0.877286 | 0.016683  | C                 | -0.069582 | -0.979638 | -0.004064 |
| C                 | -1.841762 | -0.030077 | -1.613785 | C                 | -1.801594 | -0.479873 | -1.854873 |
| C                 | -2.812966 | -0.997100 | -0.897260 | C                 | -2.760208 | -1.407120 | -1.068679 |
| C                 | -2.087978 | -2.287073 | -0.430621 | C                 | -1.985051 | -2.600351 | -0.446128 |
| C                 | -0.556145 | -2.206963 | -0.550788 | C                 | -0.456847 | -2.404519 | -0.446280 |
| C                 | -3.576258 | -0.305288 | 0.249112  | C                 | -3.569314 | -0.620950 | -0.018117 |
| C                 | -4.400105 | 0.935818  | -0.097426 | C                 | -4.594189 | 0.386013  | -0.515937 |
| H                 | -0.372647 | -0.819892 | 1.052712  | H                 | -0.518765 | -0.826505 | 0.982799  |
| O                 | -3.553458 | -0.728765 | 1.388201  | O                 | -3.429596 | -0.831686 | 1.177139  |
| C                 | -5.742391 | 0.932970  | 0.619053  | C                 | -4.913661 | 1.472572  | 0.522827  |
| O                 | -6.531631 | -0.095705 | 0.024439  | O                 | -5.552235 | 0.949615  | 1.670660  |
| C                 | 1.088214  | 1.690718  | -0.529078 | C                 | 0.919954  | 1.573603  | -0.808972 |
| C                 | -0.022669 | 2.196769  | 0.392821  | C                 | -0.295618 | 2.118213  | -0.057317 |
| O                 | -1.066362 | 1.342676  | 0.222795  | O                 | -1.262453 | 1.169897  | -0.179355 |
| O                 | 0.333950  | 0.994619  | -1.526964 | O                 | 0.297897  | 0.695350  | -1.755012 |

|                          |           |           |           |                          |           |           |           |
|--------------------------|-----------|-----------|-----------|--------------------------|-----------|-----------|-----------|
| O                        | -0.016977 | 3.126889  | 1.153493  | O                        | -0.417770 | 3.141800  | 0.559168  |
| H                        | 4.079666  | -2.382355 | 1.312614  | H                        | 3.983254  | -1.972029 | 1.835707  |
| H                        | 3.925792  | -0.906003 | 2.256743  | H                        | 3.638499  | -0.397230 | 2.539176  |
| H                        | 1.921292  | -0.801933 | -2.087762 | H                        | 2.057971  | -1.032692 | -1.930691 |
| H                        | 1.940409  | -2.404256 | -1.330351 | H                        | 2.103619  | -2.515479 | -0.960743 |
| H                        | 3.770028  | 2.731469  | 1.089405  | H                        | 3.638933  | 1.794803  | 2.085254  |
| H                        | 5.280606  | 1.822868  | 0.949180  | H                        | 3.367433  | 3.024150  | 0.852345  |
| H                        | 4.041207  | 1.322261  | 2.111729  | H                        | 4.941027  | 2.225505  | 0.964357  |
| H                        | 3.403417  | 0.967102  | -2.187461 | H                        | 3.563398  | 2.470777  | -1.569520 |
| H                        | 3.723259  | 2.521235  | -1.394501 | H                        | 4.924721  | 1.364954  | -1.436440 |
| H                        | 5.002528  | 1.322976  | -1.539565 | H                        | 3.418343  | 0.802799  | -2.155637 |
| H                        | -1.457835 | -0.509380 | -2.519777 | H                        | -1.330194 | -1.051157 | -2.660528 |
| H                        | -2.327233 | 0.898071  | -1.924815 | H                        | -2.316541 | 0.364009  | -2.319551 |
| H                        | -3.597417 | -1.246391 | -1.624746 | H                        | -3.503083 | -1.772364 | -1.790465 |
| H                        | -2.360257 | -2.463456 | 0.613591  | H                        | -2.328420 | -2.730504 | 0.583006  |
| H                        | -2.447748 | -3.145193 | -1.006903 | H                        | -2.226443 | -3.519302 | -0.989507 |
| H                        | -0.257698 | -2.321393 | -1.599855 | H                        | -0.057734 | -2.611751 | -1.446224 |
| H                        | -0.104839 | -3.037285 | -0.000410 | H                        | 0.000637  | -3.127489 | 0.234576  |
| H                        | -4.563193 | 1.018678  | -1.177046 | H                        | -4.272018 | 0.831983  | -1.463030 |
| H                        | -3.812553 | 1.807858  | 0.214994  | H                        | -5.512319 | -0.179514 | -0.733129 |
| H                        | -6.224334 | 1.916714  | 0.511435  | H                        | -5.602043 | 2.200040  | 0.080644  |
| H                        | -5.570922 | 0.743612  | 1.686129  | H                        | -3.984803 | 2.006019  | 0.775478  |
| H                        | -7.277031 | -0.277160 | 0.609814  | H                        | -4.918702 | 0.318040  | 2.046043  |
| H                        | 1.618815  | 2.515737  | -0.999758 | H                        | 1.437737  | 2.362763  | -1.349821 |
| <b>6,8-<i>epi-1e</i></b> |           |           |           | <b>6,8-<i>epi-1f</i></b> |           |           |           |
| C                        | 3.640256  | -1.147901 | 1.471908  | C                        | 3.638073  | -1.463731 | 1.194106  |
| C                        | 4.102006  | -0.433972 | 0.192942  | C                        | 4.076595  | -0.687643 | -0.055574 |
| C                        | 3.479849  | 0.976634  | 0.016635  | C                        | 3.574082  | 0.780701  | -0.073662 |
| C                        | 1.932804  | 0.782973  | 0.241174  | C                        | 2.032970  | 0.700391  | 0.242197  |
| C                        | 1.538730  | -0.741118 | 0.121203  | C                        | 1.494734  | -0.769699 | 0.036884  |
| C                        | 2.132959  | -1.374867 | 1.386332  | C                        | 2.114442  | -1.558511 | 1.199009  |
| O                        | 1.491265  | -1.971191 | 2.226479  | O                        | 1.481003  | -2.175099 | 2.030475  |
| C                        | 2.310813  | -1.380892 | -1.067285 | C                        | 2.126317  | -1.366674 | -1.252754 |
| C                        | 4.038846  | 1.962874  | 1.059005  | C                        | 4.282803  | 1.623790  | 1.002890  |
| C                        | 3.851367  | 1.496752  | -1.387999 | C                        | 3.904198  | 1.386718  | -1.453840 |
| H                        | 5.193615  | -0.365521 | 0.153032  | H                        | 5.164858  | -0.709129 | -0.170575 |
| O                        | 3.731253  | -1.261795 | -0.914447 | O                        | 3.559173  | -1.383422 | -1.194432 |
| H                        | 1.734074  | 1.081059  | 1.278517  | H                        | 1.928214  | 0.927809  | 1.310550  |
| C                        | -0.660728 | 0.157796  | -0.838155 | C                        | -0.678389 | 0.395803  | -0.657385 |
| C                        | 0.000785  | -0.943151 | 0.043225  | C                        | -0.057349 | -0.837223 | 0.060217  |
| C                        | -1.779057 | -0.337507 | -1.734906 | C                        | -1.928404 | 0.091294  | -1.460782 |
| C                        | -2.742582 | -1.303567 | -1.006448 | C                        | -2.886054 | -0.847318 | -0.691454 |
| C                        | -1.981019 | -2.474383 | -0.327043 | C                        | -2.182986 | -2.181379 | -0.325848 |

|                   |           |           |           |                   |           |           |           |
|-------------------|-----------|-----------|-----------|-------------------|-----------|-----------|-----------|
| C                 | -0.451999 | -2.341957 | -0.416582 | C                 | -0.654771 | -2.139392 | -0.508647 |
| C                 | -3.690438 | -0.569251 | -0.037509 | C                 | -3.510338 | -0.162272 | 0.538661  |
| C                 | -4.512622 | 0.588494  | -0.583353 | C                 | -4.422414 | 1.039468  | 0.305141  |
| H                 | -0.384745 | -0.815695 | 1.060701  | H                 | -0.364052 | -0.788843 | 1.110542  |
| O                 | -3.816164 | -0.928910 | 1.123293  | O                 | -3.374970 | -0.598946 | 1.665470  |
| C                 | -5.840625 | 0.775868  | 0.169122  | C                 | -5.895198 | 0.612040  | 0.421991  |
| O                 | -5.656598 | 1.166883  | 1.512012  | O                 | -6.278718 | -0.310625 | -0.594198 |
| C                 | 0.979996  | 1.637180  | -0.643387 | C                 | 1.106732  | 1.704260  | -0.505640 |
| C                 | -0.197662 | 2.128353  | 0.202240  | C                 | 0.055223  | 2.235213  | 0.470354  |
| O                 | -1.188268 | 1.208826  | 0.035702  | O                 | -1.019442 | 1.413244  | 0.343189  |
| O                 | 0.312233  | 0.832216  | -1.621584 | O                 | 0.285360  | 1.043531  | -1.475032 |
| O                 | -0.274739 | 3.096429  | 0.908098  | O                 | 0.124340  | 3.158246  | 1.236559  |
| H                 | 4.132929  | -2.122617 | 1.553687  | H                 | 4.048159  | -2.478832 | 1.167692  |
| H                 | 3.872232  | -0.598016 | 2.390586  | H                 | 3.974941  | -1.009506 | 2.132443  |
| H                 | 2.083120  | -2.449711 | -1.132510 | H                 | 1.800374  | -0.788862 | -2.123819 |
| H                 | 2.001316  | -0.908386 | -2.005237 | H                 | 1.798843  | -2.402080 | -1.389295 |
| H                 | 5.115977  | 2.108237  | 0.922015  | H                 | 4.150841  | 1.213881  | 2.008852  |
| H                 | 3.871464  | 1.624565  | 2.086178  | H                 | 3.882906  | 2.643532  | 1.014309  |
| H                 | 3.556816  | 2.941307  | 0.957943  | H                 | 5.357870  | 1.690923  | 0.803224  |
| H                 | 3.585377  | 2.551908  | -1.504695 | H                 | 3.329382  | 0.935704  | -2.264522 |
| H                 | 4.934156  | 1.423013  | -1.532044 | H                 | 3.731608  | 2.467407  | -1.465687 |
| H                 | 3.376783  | 0.929279  | -2.190396 | H                 | 4.964359  | 1.231414  | -1.679120 |
| H                 | -1.310331 | -0.862772 | -2.572759 | H                 | -1.616685 | -0.393047 | -2.391543 |
| H                 | -2.294570 | 0.530324  | -2.152175 | H                 | -2.393945 | 1.041019  | -1.734741 |
| H                 | -3.416381 | -1.697973 | -1.780349 | H                 | -3.749142 | -1.036789 | -1.343791 |
| H                 | -2.279740 | -2.505574 | 0.724591  | H                 | -2.414579 | -2.407102 | 0.718259  |
| H                 | -2.288760 | -3.425918 | -0.771404 | H                 | -2.593356 | -2.994392 | -0.932909 |
| H                 | -0.116698 | -2.538421 | -1.441934 | H                 | -0.404628 | -2.240033 | -1.571710 |
| H                 | 0.015030  | -3.096608 | 0.222128  | H                 | -0.204255 | -2.993330 | 0.004874  |
| H                 | -4.689681 | 0.456674  | -1.658221 | H                 | -4.200054 | 1.779628  | 1.080177  |
| H                 | -3.907757 | 1.497140  | -0.466045 | H                 | -4.253963 | 1.509157  | -0.670092 |
| H                 | -6.433675 | -0.150868 | 0.089869  | H                 | -6.540764 | 1.501806  | 0.418407  |
| H                 | -6.416370 | 1.569829  | -0.317641 | H                 | -6.042470 | 0.094355  | 1.373741  |
| H                 | -5.111065 | 0.469459  | 1.909134  | H                 | -6.352682 | 0.178601  | -1.424074 |
| H                 | 1.474947  | 2.465478  | -1.146116 | H                 | 1.642661  | 2.516272  | -0.992601 |
| <b>6,8-epi-1g</b> |           |           |           | <b>6,8-epi-1h</b> |           |           |           |
| C                 | -3.702077 | -1.752577 | -0.965121 | C                 | 3.412734  | -1.833301 | 1.066099  |
| C                 | -4.067866 | -1.015024 | 0.331104  | C                 | 3.979938  | -0.922687 | -0.032558 |
| C                 | -3.750429 | 0.504608  | 0.282613  | C                 | 3.608130  | 0.573042  | 0.158470  |
| C                 | -2.272559 | 0.606248  | -0.247493 | C                 | 2.055232  | 0.589711  | 0.412780  |
| C                 | -1.534072 | -0.783309 | -0.095603 | C                 | 1.403859  | -0.774994 | -0.047939 |
| C                 | -2.192547 | -1.654812 | -1.172450 | C                 | 1.887847  | -1.774976 | 1.009527  |
| O                 | -1.602969 | -2.186349 | -2.091688 | O                 | 1.162037  | -2.426635 | 1.732877  |

|   |           |           |           |   |           |           |           |
|---|-----------|-----------|-----------|---|-----------|-----------|-----------|
| C | -1.912093 | -1.436476 | 1.262067  | C | 2.041293  | -1.237305 | -1.386828 |
| C | -4.702020 | 1.237613  | -0.680983 | C | 4.342724  | 1.174059  | 1.371134  |
| C | -3.951748 | 1.087879  | 1.696612  | C | 4.046407  | 1.346025  | -1.103007 |
| H | -5.121432 | -1.166167 | 0.586358  | H | 5.066786  | -1.027930 | -0.108567 |
| O | -3.327444 | -1.627570 | 1.392429  | O | 3.463631  | -1.390850 | -1.282773 |
| H | -2.342837 | 0.812765  | -1.323255 | H | 1.920772  | 0.655166  | 1.500170  |
| C | 0.548844  | 0.637025  | 0.398515  | C | -0.603332 | 0.675589  | -0.725978 |
| C | -0.008116 | -0.638230 | -0.314744 | C | -0.141881 | -0.677694 | -0.094876 |
| C | 1.829711  | 0.441829  | 1.190135  | C | -1.715881 | 0.573921  | -1.754298 |
| C | 2.905672  | -0.440153 | 0.525446  | C | -2.866462 | -0.389695 | -1.400377 |
| C | 2.308392  | -1.582064 | -0.351319 | C | -2.391536 | -1.650736 | -0.611639 |
| C | 0.846426  | -1.874177 | 0.013735  | C | -0.876942 | -1.866173 | -0.738339 |
| C | 3.963608  | 0.389522  | -0.207581 | C | -4.026980 | 0.333218  | -0.706241 |
| C | 5.084191  | -0.359291 | -0.934760 | C | -5.221967 | -0.500741 | -0.231901 |
| H | 0.124309  | -0.474967 | -1.390008 | H | -0.474484 | -0.663203 | 0.948665  |
| O | 3.990199  | 1.604255  | -0.159045 | O | -4.047929 | 1.540669  | -0.565428 |
| C | 6.398800  | -0.175043 | -0.179009 | C | -5.518614 | -0.233138 | 1.240436  |
| O | 6.245317  | -0.804176 | 1.092271  | O | -4.445480 | -0.783268 | 2.001740  |
| C | -1.380915 | 1.730771  | 0.350015  | C | 1.250312  | 1.773443  | -0.193437 |
| C | -0.465209 | 2.316663  | -0.733462 | C | 0.137932  | 2.205476  | 0.770938  |
| O | 0.723776  | 1.671484  | -0.620993 | O | -0.988883 | 1.567156  | 0.367417  |
| O | -0.429831 | 1.193470  | 1.269164  | O | 0.495892  | 1.349890  | -1.329511 |
| O | -0.717438 | 3.157210  | -1.555193 | O | 0.211675  | 2.936133  | 1.723264  |
| H | -3.972027 | -2.810759 | -0.881331 | H | 3.726283  | -2.868083 | 0.890980  |
| H | -4.214851 | -1.364065 | -1.851861 | H | 3.748010  | -1.566913 | 2.074384  |
| H | -1.547916 | -0.815299 | 2.086027  | H | 1.807156  | -0.516110 | -2.175703 |
| H | -1.443687 | -2.423324 | 1.346236  | H | 1.631051  | -2.209792 | -1.680285 |
| H | -5.738344 | 1.176529  | -0.330928 | H | 4.130762  | 0.633276  | 2.298678  |
| H | -4.663263 | 0.831553  | -1.696486 | H | 4.036459  | 2.214206  | 1.526589  |
| H | -4.436400 | 2.298251  | -0.746911 | H | 5.427173  | 1.167570  | 1.215415  |
| H | -3.213610 | 0.726340  | 2.414123  | H | 3.468714  | 1.075274  | -1.988209 |
| H | -3.912779 | 2.181399  | 1.683135  | H | 3.964365  | 2.427122  | -0.954321 |
| H | -4.940971 | 0.807737  | 2.073079  | H | 5.098239  | 1.131866  | -1.319116 |
| H | 1.520172  | -0.013034 | 2.136167  | H | -1.230745 | 0.237519  | -2.675851 |
| H | 2.241386  | 1.428081  | 1.412522  | H | -2.106197 | 1.578283  | -1.928676 |
| H | 3.485641  | -0.912781 | 1.331275  | H | -3.294751 | -0.736366 | -2.353304 |
| H | 2.343342  | -1.305034 | -1.412876 | H | -2.644623 | -1.543084 | 0.449070  |
| H | 2.910421  | -2.489342 | -0.247026 | H | -2.924132 | -2.537693 | -0.968503 |
| H | 0.776839  | -2.147540 | 1.073557  | H | -0.602651 | -1.989249 | -1.793232 |
| H | 0.479123  | -2.724001 | -0.567649 | H | -0.590140 | -2.784037 | -0.218159 |
| H | 5.187116  | 0.073530  | -1.935487 | H | -6.087396 | -0.188511 | -0.829639 |
| H | 4.874405  | -1.426947 | -1.037551 | H | -5.071905 | -1.571730 | -0.392683 |
| H | 6.598075  | 0.900188  | -0.074841 | H | -6.476786 | -0.696209 | 1.520072  |

|                   |           |           |           |                   |           |           |           |
|-------------------|-----------|-----------|-----------|-------------------|-----------|-----------|-----------|
| H                 | 7.223262  | -0.627151 | -0.750636 | H                 | -5.600905 | 0.851326  | 1.384788  |
| H                 | 7.003670  | -0.567942 | 1.640791  | H                 | -4.416580 | -0.338934 | 2.857602  |
| H                 | -1.948464 | 2.519371  | 0.841703  | H                 | 1.871105  | 2.623207  | -0.472642 |
| <i>6,8-epi-1i</i> |           |           |           | <i>6,8-epi-1j</i> |           |           |           |
| C                 | 3.721048  | -1.551534 | 1.204565  | C                 | 3.763216  | -1.591829 | 1.094802  |
| C                 | 4.163463  | -0.770197 | -0.041461 | C                 | 4.176617  | -0.767250 | -0.133159 |
| C                 | 3.709775  | 0.715635  | -0.026588 | C                 | 3.725704  | 0.717309  | -0.056060 |
| C                 | 2.176034  | 0.682847  | 0.325316  | C                 | 2.201872  | 0.672708  | 0.335924  |
| C                 | 1.588853  | -0.765684 | 0.094759  | C                 | 1.606052  | -0.765924 | 0.065657  |
| C                 | 2.195518  | -1.584545 | 1.241206  | C                 | 2.239037  | -1.626282 | 1.166407  |
| O                 | 1.553084  | -2.170867 | 2.088961  | O                 | 1.616466  | -2.242965 | 2.007489  |
| C                 | 2.172558  | -1.372320 | -1.209978 | C                 | 2.156968  | -1.323719 | -1.274329 |
| C                 | 4.475237  | 1.514679  | 1.044462  | C                 | 4.521367  | 1.479100  | 1.019980  |
| C                 | 4.023963  | 1.332627  | -1.405449 | C                 | 4.002711  | 1.380759  | -1.421194 |
| H                 | 5.248119  | -0.825592 | -0.176157 | H                 | 5.257580  | -0.818835 | -0.295855 |
| O                 | 3.604498  | -1.433509 | -1.180908 | O                 | 3.588922  | -1.390407 | -1.280882 |
| H                 | 2.099552  | 0.889132  | 1.400713  | H                 | 2.155319  | 0.836895  | 1.420347  |
| C                 | -0.542739 | 0.464160  | -0.637497 | C                 | -0.541861 | 0.492691  | -0.565215 |
| C                 | 0.041786  | -0.758635 | 0.141972  | C                 | 0.060763  | -0.759822 | 0.150621  |
| C                 | -1.703784 | 0.158021  | -1.568075 | C                 | -1.724127 | 0.223719  | -1.480752 |
| C                 | -2.762645 | -0.823992 | -1.024567 | C                 | -2.771559 | -0.783475 | -0.959711 |
| C                 | -2.169880 | -1.898597 | -0.064512 | C                 | -2.157304 | -1.887813 | -0.048206 |
| C                 | -0.658144 | -2.065695 | -0.269190 | C                 | -0.651201 | -2.049586 | -0.292858 |
| C                 | -3.985244 | -0.106733 | -0.438467 | C                 | -3.985321 | -0.092400 | -0.322853 |
| C                 | -5.046374 | -0.961219 | 0.241016  | C                 | -5.091228 | -0.979967 | 0.233251  |
| H                 | -0.222798 | -0.611519 | 1.195015  | H                 | -0.177585 | -0.653547 | 1.214832  |
| O                 | -4.130742 | 1.100555  | -0.552366 | O                 | -4.095890 | 1.123540  | -0.320580 |
| C                 | -6.399328 | -0.245235 | 0.355881  | C                 | -6.183998 | -0.188789 | 0.962552  |
| O                 | -6.339573 | 0.889850  | 1.193864  | O                 | -6.852275 | 0.722601  | 0.112965  |
| C                 | 1.263555  | 1.725279  | -0.380387 | C                 | 1.272171  | 1.742539  | -0.302884 |
| C                 | 0.181383  | 2.227615  | 0.585419  | C                 | 0.215134  | 2.204286  | 0.709888  |
| O                 | -0.925888 | 1.475997  | 0.344915  | O                 | -0.898771 | 1.464159  | 0.466373  |
| O                 | 0.473577  | 1.106936  | -1.397442 | O                 | 0.456215  | 1.165620  | -1.323856 |
| O                 | 0.259242  | 3.088031  | 1.420363  | O                 | 0.315400  | 3.029129  | 1.577877  |
| H                 | 4.088477  | -2.581860 | 1.148775  | H                 | 4.128157  | -2.619587 | 0.993383  |
| H                 | 4.096727  | -1.131459 | 2.143975  | H                 | 4.162044  | -1.206457 | 2.039585  |
| H                 | 1.847681  | -0.780717 | -2.071284 | H                 | 1.814489  | -0.697931 | -2.103985 |
| H                 | 1.805493  | -2.396556 | -1.341625 | H                 | 1.783078  | -2.340939 | -1.436725 |
| H                 | 4.353574  | 1.093130  | 2.046923  | H                 | 4.424411  | 1.025546  | 2.011095  |
| H                 | 4.114096  | 2.548081  | 1.082039  | H                 | 4.165349  | 2.511840  | 1.100432  |
| H                 | 5.546716  | 1.545932  | 0.818380  | H                 | 5.586691  | 1.514751  | 0.766949  |
| H                 | 3.888005  | 2.418410  | -1.393962 | H                 | 3.366715  | 0.993903  | -2.218931 |
| H                 | 5.071439  | 1.145117  | -1.663170 | H                 | 3.869108  | 2.465592  | -1.368515 |

|                   |           |           |           |                   |           |           |           |
|-------------------|-----------|-----------|-----------|-------------------|-----------|-----------|-----------|
| H                 | 3.410766  | 0.917258  | -2.206776 | H                 | 5.042214  | 1.201308  | -1.714250 |
| H                 | -1.250056 | -0.262647 | -2.470502 | H                 | -1.289071 | -0.158107 | -2.409370 |
| H                 | -2.175168 | 1.103458  | -1.842629 | H                 | -2.199682 | 1.180125  | -1.704912 |
| H                 | -3.171045 | -1.359885 | -1.894949 | H                 | -3.188627 | -1.289659 | -1.842967 |
| H                 | -2.336319 | -1.606604 | 0.979422  | H                 | -2.299601 | -1.627431 | 1.008288  |
| H                 | -2.684199 | -2.853975 | -0.204168 | H                 | -2.676862 | -2.837514 | -0.206751 |
| H                 | -0.448380 | -2.332600 | -1.312154 | H                 | -0.467007 | -2.277330 | -1.349800 |
| H                 | -0.284755 | -2.879370 | 0.357775  | H                 | -0.265078 | -2.886690 | 0.294322  |
| H                 | -5.146901 | -1.916049 | -0.291797 | H                 | -4.662288 | -1.744952 | 0.891718  |
| H                 | -4.687909 | -1.208129 | 1.249426  | H                 | -5.531839 | -1.521885 | -0.616131 |
| H                 | -7.131133 | -0.928878 | 0.798140  | H                 | -5.740993 | 0.318207  | 1.833658  |
| H                 | -6.759402 | 0.010951  | -0.653660 | H                 | -6.940281 | -0.884502 | 1.339921  |
| H                 | -5.708792 | 1.489084  | 0.764863  | H                 | -6.176577 | 1.370642  | -0.138876 |
| H                 | 1.812409  | 2.560493  | -0.812238 | H                 | 1.809701  | 2.595606  | -0.713728 |
| <b>6,8-epi-1k</b> |           |           |           | <b>6,8-epi-1l</b> |           |           |           |
| C                 | 3.549395  | -1.942709 | 0.994663  | C                 | -3.632702 | -1.766622 | -0.731219 |
| C                 | 3.558436  | -1.727335 | -0.524786 | C                 | -3.378284 | -1.587513 | 0.771964  |
| C                 | 3.575738  | -0.231150 | -0.933787 | C                 | -3.244170 | -0.102186 | 1.200779  |
| C                 | 2.423699  | 0.445504  | -0.099546 | C                 | -2.218127 | 0.534432  | 0.190519  |
| C                 | 1.434673  | -0.639083 | 0.479862  | C                 | -1.396115 | -0.588699 | -0.556157 |
| C                 | 2.260530  | -1.354551 | 1.560798  | C                 | -2.426282 | -1.229315 | -1.497171 |
| O                 | 1.942837  | -1.432935 | 2.729866  | O                 | -2.314272 | -1.291311 | -2.704579 |
| C                 | 1.173332  | -1.708737 | -0.618398 | C                 | -1.015518 | -1.701825 | 0.459460  |
| C                 | 4.925642  | 0.422497  | -0.583243 | C                 | -4.595702 | 0.629392  | 1.099728  |
| C                 | 3.382370  | -0.143858 | -2.462134 | C                 | -2.784685 | -0.063088 | 2.673564  |
| H                 | 4.398053  | -2.251184 | -0.992328 | H                 | -4.157398 | -2.077179 | 1.364557  |
| O                 | 2.380667  | -2.352527 | -1.045821 | O                 | -2.167485 | -2.284554 | 1.083098  |
| H                 | 2.911976  | 0.916662  | 0.762809  | H                 | -2.819856 | 1.044861  | -0.572128 |
| C                 | -0.316613 | 1.230086  | 0.255510  | C                 | 0.494252  | 1.153687  | -0.558877 |
| C                 | 0.152234  | 0.004503  | 1.089615  | C                 | -0.194622 | 0.002009  | -1.348859 |
| C                 | -1.816124 | 1.420514  | 0.189803  | C                 | 2.001156  | 1.189753  | -0.675664 |
| C                 | -2.582459 | 0.201264  | -0.349842 | C                 | 2.639098  | -0.123706 | -0.208783 |
| C                 | -1.958798 | -1.153151 | 0.132304  | C                 | 1.975413  | -1.382941 | -0.869529 |
| C                 | -1.026324 | -0.970503 | 1.339226  | C                 | 0.850694  | -1.021069 | -1.859086 |
| C                 | -4.043965 | 0.252624  | 0.112133  | C                 | 4.142286  | -0.114407 | -0.463283 |
| C                 | -5.069756 | -0.367899 | -0.816981 | C                 | 4.973656  | -1.212440 | 0.203213  |
| H                 | 0.450789  | 0.383379  | 2.071318  | H                 | -0.631527 | 0.452076  | -2.245139 |
| O                 | -4.359005 | 0.736717  | 1.185549  | O                 | 4.687725  | 0.736511  | -1.141666 |
| C                 | -6.459088 | -0.480958 | -0.207698 | C                 | 5.761044  | -0.625792 | 1.374862  |
| O                 | -7.300012 | -1.062490 | -1.197902 | O                 | 4.812906  | -0.164657 | 2.333580  |
| C                 | 1.607986  | 1.573340  | -0.802057 | C                 | -1.238830 | 1.604258  | 0.755506  |
| C                 | 1.416154  | 2.711804  | 0.198696  | C                 | -1.106977 | 2.741715  | -0.259808 |
| O                 | 0.244828  | 2.453648  | 0.833134  | O                 | -0.032681 | 2.435607  | -1.029851 |

|                          |           |           |           |   |           |           |           |
|--------------------------|-----------|-----------|-----------|---|-----------|-----------|-----------|
| O                        | 0.253850  | 1.179105  | -1.048871 | O | 0.102759  | 1.112937  | 0.810405  |
| O                        | 2.143855  | 3.635136  | 0.450202  | O | -1.809748 | 3.705248  | -0.413019 |
| H                        | 3.569507  | -3.014122 | 1.220593  | H | -3.746527 | -2.830125 | -0.966716 |
| H                        | 4.407006  | -1.494546 | 1.508506  | H | -4.539025 | -1.264184 | -1.086329 |
| H                        | 0.685422  | -1.239368 | -1.478766 | H | -0.352260 | -1.289640 | 1.226461  |
| H                        | 0.515023  | -2.494236 | -0.235058 | H | -0.487584 | -2.512539 | -0.052468 |
| H                        | 5.168554  | 0.334398  | 0.480068  | H | -4.476911 | 1.688913  | 1.350963  |
| H                        | 4.906632  | 1.490964  | -0.823698 | H | -5.325685 | 0.202559  | 1.796212  |
| H                        | 5.741284  | -0.033004 | -1.155453 | H | -5.022030 | 0.583470  | 0.092882  |
| H                        | 3.566230  | 0.871230  | -2.827208 | H | -1.768895 | -0.437249 | 2.812997  |
| H                        | 4.104014  | -0.798113 | -2.961803 | H | -2.837699 | 0.951884  | 3.079224  |
| H                        | 2.385875  | -0.451514 | -2.783717 | H | -3.448822 | -0.685557 | 3.282005  |
| H                        | -2.015018 | 2.306641  | -0.419249 | H | 2.371187  | 2.029193  | -0.082287 |
| H                        | -2.171011 | 1.637247  | 1.201480  | H | 2.269779  | 1.394080  | -1.715657 |
| H                        | -2.569932 | 0.210991  | -1.444505 | H | 2.525611  | -0.203770 | 0.878435  |
| H                        | -2.749389 | -1.862893 | 0.402249  | H | 2.722723  | -1.966683 | -1.419478 |
| H                        | -1.424537 | -1.606687 | -0.704965 | H | 1.603879  | -2.044837 | -0.083616 |
| H                        | -0.641605 | -1.937378 | 1.675910  | H | 0.341698  | -1.927260 | -2.199856 |
| H                        | -1.617178 | -0.582093 | 2.175804  | H | 1.310450  | -0.592568 | -2.756234 |
| H                        | -4.720098 | -1.354603 | -1.148037 | H | 5.681158  | -1.606133 | -0.533775 |
| H                        | -5.114685 | 0.242153  | -1.730532 | H | 4.347241  | -2.033274 | 0.565896  |
| H                        | -6.808809 | 0.515434  | 0.095517  | H | 6.389765  | 0.194844  | 1.001713  |
| H                        | -6.413986 | -1.096576 | 0.702856  | H | 6.419795  | -1.397212 | 1.801647  |
| H                        | -8.191617 | -1.120880 | -0.832585 | H | 5.283420  | 0.334992  | 3.012355  |
| H                        | 2.048977  | 1.921676  | -1.733285 | H | -1.519626 | 1.979220  | 1.737619  |
| <b>6,8-<i>epi</i>-1m</b> |           |           |           |   |           |           |           |
| C                        | 3.549797  | -1.942286 | 0.994531  |   |           |           |           |
| C                        | 3.557979  | -1.727598 | -0.525026 |   |           |           |           |
| C                        | 3.575108  | -0.231597 | -0.934713 |   |           |           |           |
| C                        | 2.423584  | 0.445480  | -0.100106 |   |           |           |           |
| C                        | 1.434843  | -0.638821 | 0.480345  |   |           |           |           |
| C                        | 2.261297  | -1.353788 | 1.561151  |   |           |           |           |
| O                        | 1.944292  | -1.431584 | 2.730445  |   |           |           |           |
| C                        | 1.172824  | -1.709018 | -0.617208 |   |           |           |           |
| C                        | 4.925251  | 0.422135  | -0.585239 |   |           |           |           |
| C                        | 3.380834  | -0.144968 | -2.462973 |   |           |           |           |
| H                        | 4.397315  | -2.251688 | -0.992804 |   |           |           |           |
| O                        | 2.379897  | -2.352972 | -1.045124 |   |           |           |           |
| H                        | 2.912370  | 0.917009  | 0.761759  |   |           |           |           |
| C                        | -0.316541 | 1.230257  | 0.256033  |   |           |           |           |
| C                        | 0.152744  | 0.005067  | 1.090477  |   |           |           |           |
| C                        | -1.816087 | 1.420460  | 0.190842  |   |           |           |           |
| C                        | -2.582141 | 0.200941  | -0.348508 |   |           |           |           |

|   |           |           |           |
|---|-----------|-----------|-----------|
| C | -1.958900 | -1.153237 | 0.134977  |
| C | -1.025727 | -0.969749 | 1.341252  |
| C | -4.044016 | 0.252866  | 0.112194  |
| C | -5.069021 | -0.368797 | -0.817046 |
| H | 0.451852  | 0.384415  | 2.071830  |
| O | -4.359984 | 0.738327  | 1.184713  |
| C | -6.458870 | -0.481113 | -0.208810 |
| O | -7.299023 | -1.063594 | -1.199111 |
| C | 1.607516  | 1.573038  | -0.802665 |
| C | 1.416185  | 2.711925  | 0.197703  |
| O | 0.245132  | 2.454076  | 0.832788  |
| O | 0.253280  | 1.178663  | -1.048622 |
| O | 2.144008  | 3.635357  | 0.448485  |
| H | 3.569972  | -3.013599 | 1.220933  |
| H | 4.407731  | -1.493954 | 1.507688  |
| H | 0.684289  | -1.240109 | -1.477472 |
| H | 0.514809  | -2.494342 | -0.233000 |
| H | 5.168807  | 0.334415  | 0.477954  |
| H | 4.906131  | 1.490511  | -0.826090 |
| H | 5.740521  | -0.033616 | -1.157780 |
| H | 4.102154  | -0.799470 | -2.962785 |
| H | 2.384129  | -0.452722 | -2.783806 |
| H | 3.564534  | 0.869954  | -2.828589 |
| H | -2.015373 | 2.306446  | -0.418293 |
| H | -2.170811 | 1.637291  | 1.202551  |
| H | -2.568740 | 0.209972  | -1.443172 |
| H | -2.749684 | -1.862272 | 0.406192  |
| H | -1.425261 | -1.608032 | -0.702001 |
| H | -0.640900 | -1.936437 | 1.678359  |
| H | -1.616079 | -0.580779 | 2.177922  |
| H | -5.113211 | 0.240167  | -1.731359 |
| H | -4.719073 | -1.355887 | -1.146640 |
| H | -6.808745 | 0.515623  | 0.093089  |
| H | -6.414594 | -1.095800 | 0.702418  |
| H | -8.190955 | -1.121444 | -0.834509 |
| H | 2.048038  | 1.920979  | -1.734262 |



## References

- (1) Frisch, M. J.; Trucks, G. W.; Schlegel, H. B.; Scuseria, G. E.; Robb, M. A.; Cheeseman, J. R.; Scalmani, G.; Barone, V.; Mennucci, B.; Petersson, G. A.; Nakatsuji, H.; Caricato, M.; Li, X.; Hratchian, H. P.; Izmaylov, A. F.; Bloino, J.; Zheng, G.; Sonnenberg, J. L.; Hada, M.; Ehara, M.; Toyota, K.; Fukuda, R.; Hasegawa, J.; Ishida, M.; Nakajima, T.; Honda, Y.; Kitao, O.; Nakai, H.; Vreven, T.; Montgomery, J. A., Jr., J. E. P.; Ogliaro, F.; Bearpark, M.; Heyd, J. J.; Brothers, E.; Kudin, K. N.; Staroverov, V. N.; Keith, T.; Kobayashi, R.; Normand, J.; Raghavachari, K.; Rendell, A.; Burant, J. C.; Iyengar, S. S.; Tomasi, J.; Cossi, M.; Rega, N.; Millam, J. M.; Klene, M.; Knox, J. E.; Cross, J. B.; Bakken, V.; Adamo, C.; Jaramillo, J.; Gomperts, R.; Stratmann, R. E.; Yazyev, O.; Austin, A. J.; Cammi, R.; Pomelli, C.; Ochterski, J. W.; Martin, R. L.; Morokuma, K.; Zakrzewski, V. G.; Voth, G. A.; Salvador, P.; Dannenberg, J. J.; Dapprich, S.; Daniels, A. D.; Farkas, O.; Foresman, J. B.; Ortiz, J. V.; Cioslowski, J.; Fox, D. J. *Gaussian 09*, Revision B.01; Gaussian, Inc., Wallingford CT: **2010**.
- (2) Glendening, E. D.; Reed, A. E.; Carpenter, E. J.; Weinhold, F. *NBO*, Version 3.1; Gaussian, Inc., Wallingford, CT: 2009.
- (3) Lu, T.; Chen, F. W. J. *Comput. Chem.* **2012**, 33, 580-592.
- (4) Humphrey, W.; Dalke, A.; Schulten, K. *J. Mol. Graph.* **1996**, 14, 33-38.
- (5) Sugidachi, A.; Asai, F.; Yoneda, K.; Iwamura, R.; Ogawa, T.; Otsuguro, K.; Koike, H. *Br. J. Pharmacol.* **2001**, 132, 47-54.
